# Supplementary material
Source: PubMed Central journal article supplement (PMC5999033)

# Supplementary Material

## SAR Studies on Truxillic Acid Mono Esters as a New Class of Antinociceptive Agents, Targeting Fatty Acid Binding Proteins

Su Yan,<sup>a,#</sup> Matthew W. Elmes,<sup>b,#</sup> Simon Tong,<sup>a</sup> Kongzhen Hu,<sup>c</sup> Monaf Awwa,<sup>a</sup> Gary Y. H. Teng,<sup>c</sup> Yunrong Jing,<sup>c</sup> Matthew Freitag,<sup>a</sup> Qianwen Gan,<sup>a</sup> Timothy Clement,<sup>a</sup> Longfei Wei,<sup>a</sup> Joseph M. Sweeney,<sup>b</sup> Olivia M. Joseph,<sup>b</sup> Joyce Che,<sup>b</sup> Gregory S. Carbonetti,<sup>b</sup> Liqun Wang,<sup>b</sup> Diane M. Bogdan,<sup>c</sup> Jerome Falcone,<sup>c</sup> Norbert Smietalo,<sup>c</sup> Yuchen Zhou,<sup>d</sup> Brian Ralph,<sup>d</sup> Hao-Chi Hsu,<sup>f</sup> Huilin Li,<sup>f</sup> Robert C. Rizzo,<sup>d,e</sup> Dale G. Deutsch,<sup>b,e</sup> Martin Kaczocho,<sup>b,c,e</sup> and Iwao Ojima,<sup>a,e,\*</sup>

<sup>a</sup>Department of Chemistry, Stony Brook University, Stony Brook, New York 11794-3400, U.S.A.;

<sup>b</sup>Department of Biochemistry and Cell Biology, Stony Brook University, Stony Brook, New York 11794-5215, U.S.A.; <sup>c</sup>Department of Anesthesiology, Stony Brook University, Stony Brook, New York 11794-8480, U.S.A.; <sup>d</sup>Applied Mathematics and Statistics, Stony Brook University, Stony Brook, New York 11794-3600, U.S.A.; <sup>e</sup>Institute of Chemical Biology and Drug Discovery, Stony Brook University, Stony Brook, New York 11794-3400, U.S.A.; <sup>f</sup>Cryo-EM Structural Biology Laboratory, Van Andel Research Institute, Grand Rapids, Michigan 49503, U.S.A.

### Table of Contents

|                                                                              |         |
|------------------------------------------------------------------------------|---------|
| Single crystal X-ray crystallographic analysis of SB-FI-26A (3-A) .....      | S2-S8   |
| Figure S1 .....                                                              | S2      |
| Table S1 .....                                                               | S3      |
| Table S2 .....                                                               | S4      |
| Table S3 .....                                                               | S5      |
| Table S4 .....                                                               | S6      |
| Table S5 .....                                                               | S7      |
| Table S6 .....                                                               | S8      |
| Figures S2, S3 and S4 (Chiral HPLC traces for optical resolution of 3) ..... | S9-S10  |
| Table S7 (Docking for drug design) .....                                     | S11-13  |
| Protein Expression and Purification of FABP3 .....                           | S13     |
| Crystallization and structure determination of FABP3 .....                   | S13     |
| Table S8 (Data collection for FABP3 structure) .....                         | S14     |
| AutoDock 4.2 parameters .....                                                | S15     |
| Figure S5 (FABP4 affinity assay) .....                                       | S16     |
| NMR Spectra of New Compounds .....                                           | S17-S70 |

---

\*Corresponding author: phone: 631-632-1339. Fax: 631-632-7942. E-mail:

[iwao.ojima@stonybrook.edu](mailto:iwao.ojima@stonybrook.edu).

&S.Y. and M.E. contributed equally to this work.

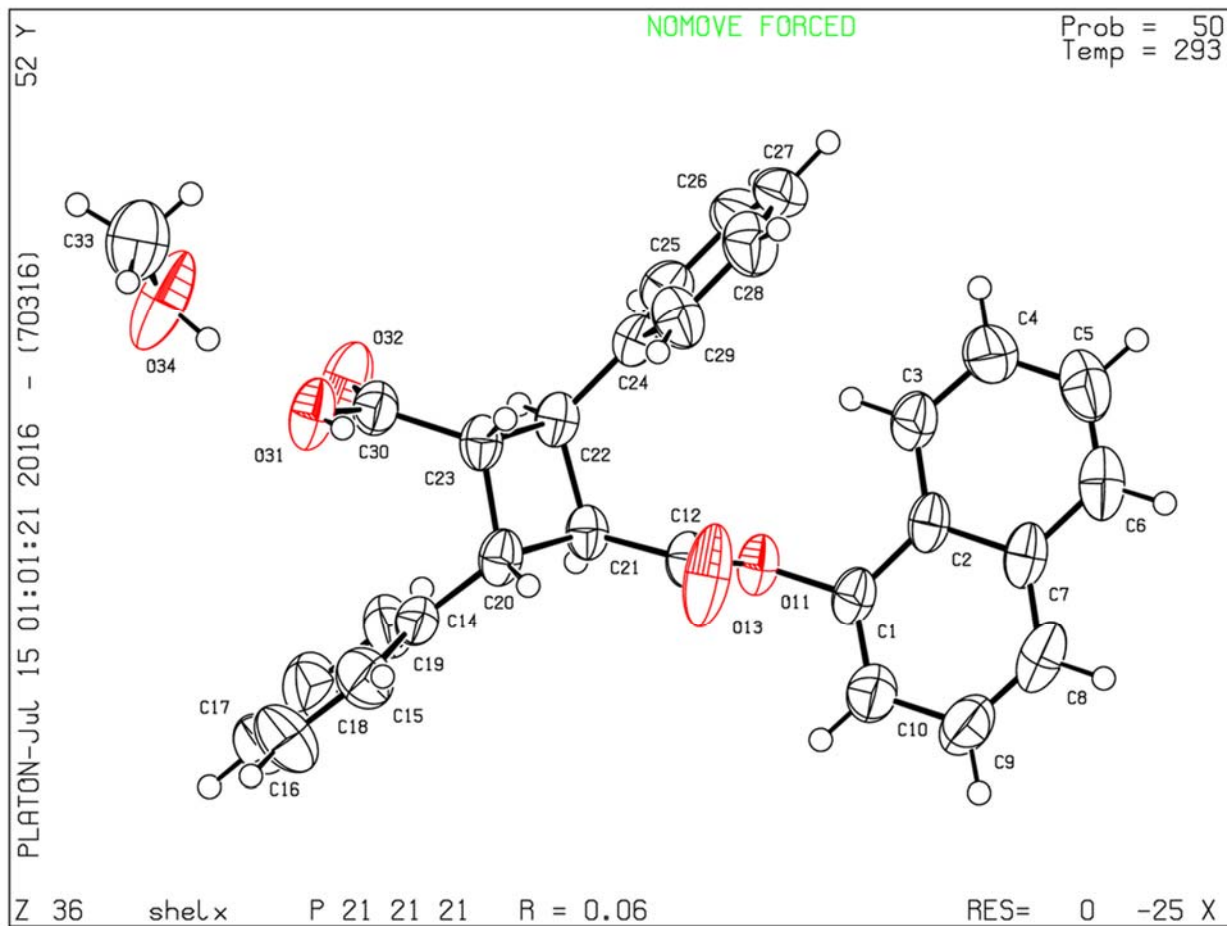

**Figure S1.** ORTEP representation of the crystal structure of (*R,R,R,R*)-SB-FI-26 (**3-A**)

**Table S1.** Crystal data and structure refinement for (*R,R,R,R*)-SB-FI-26 (**3-A**).

|                                             |                                                               |
|---------------------------------------------|---------------------------------------------------------------|
| Identification code                         | SB-FI-26 A                                                    |
| Empirical formula                           | C <sub>30</sub> H <sub>28</sub> O <sub>4</sub>                |
| Formula weight                              | 452.52                                                        |
| Temperature/K                               | 293(2)                                                        |
| Crystal system                              | orthorhombic                                                  |
| Space group                                 | P2 <sub>1</sub> 2 <sub>1</sub> 2 <sub>1</sub>                 |
| a/Å                                         | 5.9061(2)                                                     |
| b/Å                                         | 8.3860(5)                                                     |
| c/Å                                         | 47.6746(19)                                                   |
| $\alpha$ /°                                 | 90                                                            |
| $\beta$ /°                                  | 90                                                            |
| $\gamma$ /°                                 | 90                                                            |
| Volume/Å <sup>3</sup>                       | 2361.25(19)                                                   |
| Z                                           | 4                                                             |
| $\rho_{\text{calc}}/\text{cm}^3$            | 1.273                                                         |
| $\mu/\text{mm}^{-1}$                        | 0.666                                                         |
| F(000)                                      | 960.0                                                         |
| Crystal size/mm <sup>3</sup>                | ? × ? × ?                                                     |
| Radiation                                   | CuK $\alpha$ ( $\lambda$ = 1.54184)                           |
| 2 $\theta$ range for data collection/°      | 7.418 to 146.328                                              |
| Index ranges                                | -5 ≤ h ≤ 7, -10 ≤ k ≤ 9, -56 ≤ l ≤ 58                         |
| Reflections collected                       | 6076                                                          |
| Independent reflections                     | 3943 [R <sub>int</sub> = 0.0396, R <sub>sigma</sub> = 0.0392] |
| Data/restraints/parameters                  | 3943/0/313                                                    |
| Goodness-of-fit on F <sup>2</sup>           | 1.187                                                         |
| Final R indexes [I ≥ 2 $\sigma$ (I)]        | R <sub>1</sub> = 0.0607, wR <sub>2</sub> = 0.1537             |
| Final R indexes [all data]                  | R <sub>1</sub> = 0.0696, wR <sub>2</sub> = 0.1602             |
| Largest diff. peak/hole / e Å <sup>-3</sup> | 0.24/-0.31                                                    |
| Flack parameter                             | 0.0(3)                                                        |

**Table S2** Fractional Atomic Coordinates ( $\times 10^4$ ) and Equivalent Isotropic Displacement Parameters ( $\text{\AA}^2 \times 10^3$ ) for (*R,R,R,R*)-SB-FI-26 (**3-A**).  $U_{\text{eq}}$  is defined as 1/3 of the trace of the orthogonalised  $U_{\text{IJ}}$  tensor.

| <b>Atom</b> | <b><i>x</i></b> | <b><i>y</i></b> | <b><i>z</i></b> | <b><i>U</i>(eq)</b> |
|-------------|-----------------|-----------------|-----------------|---------------------|
| O11         | 12254(5)        | 12069(4)        | 10822.0(6)      | 48(3)               |
| O32         | 6516(6)         | 13212(6)        | 11852.7(7)      | 68(3)               |
| O31         | 9195(6)         | 13183(7)        | 12166.5(6)      | 65(3)               |
| C1          | 14134(8)        | 12124(7)        | 10639.8(9)      | 47(3)               |
| C2          | 14554(9)        | 13568(7)        | 10496.0(9)      | 46(3)               |
| C21         | 10659(8)        | 11975(6)        | 11277.0(8)      | 40(3)               |
| C12         | 12743(8)        | 12153(6)        | 11101.5(9)      | 45(3)               |
| O13         | 14593(6)        | 12340(8)        | 11181.5(7)      | 93(3)               |
| C23         | 10335(8)        | 13231(6)        | 11680.6(9)      | 43(3)               |
| C20         | 11226(8)        | 11549(6)        | 11588.6(9)      | 45(3)               |
| C22         | 9477(8)         | 13545(6)        | 11378.6(9)      | 41(3)               |
| C30         | 8497(10)        | 13225(6)        | 11902.5(10)     | 49(3)               |
| C6          | 16953(12)       | 15040(9)        | 10169.0(11)     | 69(3)               |
| C7          | 16485(10)       | 13611(7)        | 10314.2(9)      | 53(3)               |
| C14         | 10133(9)        | 10100(6)        | 11711.8(10)     | 48(3)               |
| C25         | 8385(9)         | 15690(7)        | 11043.3(11)     | 51(3)               |
| O34         | 3414(8)         | 13546(9)        | 12264.3(9)      | 108(4)              |
| C24         | 9950(8)         | 15101(6)        | 11234.2(9)      | 43(3)               |
| C3          | 13206(10)       | 14936(7)        | 10522(1)        | 54(3)               |
| C29         | 11881(11)       | 15991(7)        | 11280.9(11)     | 59(3)               |
| C8          | 17823(10)       | 12231(9)        | 10284.0(11)     | 69(3)               |
| C4          | 13709(13)       | 16290(8)        | 10374.9(11)     | 69(3)               |
| C27         | 10647(11)       | 17972(7)        | 10952.4(11)     | 64(3)               |
| C10         | 15433(11)       | 10812(8)        | 10603.4(11)     | 61(3)               |
| C9          | 17296(12)       | 10858(9)        | 10421.4(12)     | 72(3)               |
| C5          | 15601(13)       | 16338(9)        | 10197.4(12)     | 76(4)               |
| C15         | 11248(14)       | 9305(8)         | 11927.1(13)     | 78(3)               |
| C26         | 8746(11)        | 17099(7)        | 10902.3(11)     | 63(3)               |
| C19         | 8089(12)        | 9502(7)         | 11624.8(12)     | 66(3)               |
| C28         | 12242(12)       | 17425(7)        | 11141.7(11)     | 66(3)               |
| C18         | 7165(14)        | 8156(8)         | 11746.2(14)     | 84(4)               |
| C16         | 10300(20)       | 7960(11)        | 12049.1(17)     | 112(4)              |
| C17         | 8320(20)        | 7383(9)         | 11957.4(17)     | 105(4)              |
| C33         | 4125(14)        | 14668(11)       | 12463.7(14)     | 95(4)               |

**Table S3.** Anisotropic Displacement Parameters ( $\text{\AA}^2 \times 10^3$ ) for (*R,R,R,R*)-SB-FI-26 (**3-A**). The Anisotropic displacement factor exponent takes the form:  $-2\pi^2[h^2a^*^2U_{11}+2hka^*b^*U_{12}+\dots]$ .

| Atom | U <sub>11</sub> | U <sub>22</sub> | U <sub>33</sub> | U <sub>23</sub> | U <sub>13</sub> | U <sub>12</sub> |
|------|-----------------|-----------------|-----------------|-----------------|-----------------|-----------------|
| O11  | 41(3)           | 72(4)           | 32(3)           | 2.3(15)         | 3.7(13)         | -3.0(19)        |
| O32  | 40(3)           | 109(4)          | 54(4)           | -13(2)          | 7.3(17)         | -12(2)          |
| O31  | 53(4)           | 103(4)          | 37(3)           | -1(2)           | 6.6(16)         | -3(3)           |
| C1   | 42(4)           | 67(4)           | 32(4)           | -1(2)           | 1.8(19)         | 2(3)            |
| C2   | 42(4)           | 68(4)           | 27(3)           | -1(2)           | 0.4(19)         | -5(3)           |
| C21  | 36(4)           | 50(4)           | 35(4)           | -1(2)           | 0.2(19)         | -13(2)          |
| C12  | 45(4)           | 55(4)           | 35(4)           | -3(2)           | 3(2)            | -10(3)          |
| O13  | 43(4)           | 196(7)          | 41(3)           | -10(3)          | 2.0(17)         | -41(3)          |
| C23  | 40(4)           | 54(4)           | 34(4)           | -2(2)           | 0.8(19)         | -10(2)          |
| C20  | 36(4)           | 64(4)           | 35(4)           | 2(2)            | -0.1(19)        | -1(3)           |
| C22  | 31(4)           | 55(4)           | 37(4)           | -2(2)           | -0.8(18)        | -7(2)           |
| C30  | 55(4)           | 50(4)           | 42(4)           | -5(2)           | 9(2)            | -9(3)           |
| C6   | 68(5)           | 94(6)           | 44(4)           | 4(3)            | 10(3)           | -19(4)          |
| C7   | 45(4)           | 81(5)           | 33(4)           | -2(2)           | 3(2)            | -8(3)           |
| C14  | 56(4)           | 52(4)           | 38(4)           | 4(2)            | 11(2)           | 10(3)           |
| C25  | 36(4)           | 60(4)           | 58(4)           | -1(2)           | 0(2)            | 3(3)            |
| O34  | 47(4)           | 214(8)          | 63(4)           | -41(4)          | 9(2)            | -2(4)           |
| C24  | 36(4)           | 53(4)           | 40(4)           | -3(2)           | 4(2)            | -1(2)           |
| C3   | 54(4)           | 69(4)           | 37(4)           | 1(2)            | 4(2)            | 2(3)            |
| C29  | 70(5)           | 60(4)           | 47(4)           | 4(2)            | -5(3)           | -18(3)          |
| C8   | 51(4)           | 110(6)          | 45(4)           | -7(3)           | 11(2)           | 9(4)            |
| C4   | 90(5)           | 66(5)           | 51(4)           | 7(3)            | 4(3)            | 9(4)            |
| C27  | 93(5)           | 40(4)           | 58(4)           | 2(2)            | 12(3)           | 2(3)            |
| C10  | 64(5)           | 69(5)           | 51(4)           | 4(3)            | 10(3)           | 7(3)            |
| C9   | 69(5)           | 88(5)           | 58(4)           | -1(3)           | 15(3)           | 25(4)           |
| C5   | 97(6)           | 82(5)           | 50(4)           | 11(3)           | 6(3)            | -20(4)          |
| C15  | 90(6)           | 81(5)           | 61(4)           | 24(3)           | 4(4)            | 23(4)           |
| C26  | 72(5)           | 57(4)           | 60(4)           | 7(3)            | -2(3)           | 12(3)           |
| C19  | 75(5)           | 66(5)           | 57(4)           | 7(3)            | 12(3)           | -15(4)          |
| C28  | 78(5)           | 61(4)           | 60(4)           | -6(3)           | 5(3)            | -26(3)          |
| C18  | 99(6)           | 72(5)           | 82(5)           | -6(4)           | 31(4)           | -24(4)          |
| C16  | 164(10)         | 91(7)           | 81(6)           | 46(5)           | 17(6)           | 31(7)           |
| C17  | 171(10)         | 55(5)           | 89(6)           | 13(4)           | 55(6)           | 2(6)            |
| C33  | 98(7)           | 122(7)          | 65(5)           | -4(4)           | 2(4)            | -7(6)           |

**Table S4.** Bond Lengths for (*R,R,R,R*)-SB-FI-26 (**3-A**).

| Atom | Atom | Length/Å | Atom | Atom | Length/Å  |
|------|------|----------|------|------|-----------|
| O11  | C12  | 1.365(5) | C7   | C8   | 1.409(8)  |
| O11  | C1   | 1.410(5) | C14  | C19  | 1.371(9)  |
| O32  | C30  | 1.194(7) | C14  | C15  | 1.390(8)  |
| O31  | C30  | 1.325(6) | C25  | C26  | 1.376(8)  |
| C1   | C10  | 1.352(8) | C25  | C24  | 1.388(7)  |
| C1   | C2   | 1.413(7) | O34  | C33  | 1.402(9)  |
| C2   | C3   | 1.402(7) | C24  | C29  | 1.381(8)  |
| C2   | C7   | 1.433(7) | C3   | C4   | 1.367(8)  |
| C21  | C12  | 1.496(6) | C29  | C28  | 1.390(7)  |
| C21  | C20  | 1.564(6) | C8   | C9   | 1.361(9)  |
| C21  | C22  | 1.567(7) | C4   | C5   | 1.402(9)  |
| C12  | O13  | 1.168(6) | C27  | C26  | 1.362(9)  |
| C23  | C30  | 1.516(6) | C27  | C28  | 1.383(8)  |
| C23  | C22  | 1.549(6) | C10  | C9   | 1.402(8)  |
| C23  | C20  | 1.568(7) | C15  | C16  | 1.387(11) |
| C20  | C14  | 1.496(7) | C19  | C18  | 1.381(8)  |
| C22  | C24  | 1.502(7) | C18  | C17  | 1.379(11) |
| C6   | C5   | 1.357(9) | C16  | C17  | 1.339(13) |
| C6   | C7   | 1.411(8) |      |      |           |

**Table S5.** Bond Angles for (*R,R,R,R*)-SB-FI-26 (**3-A**).

| <b>Atom</b> | <b>Atom</b> | <b>Atom</b> | <b>Angle/°</b> | <b>Atom</b> | <b>Atom</b> | <b>Atom</b> | <b>Angle/°</b> |
|-------------|-------------|-------------|----------------|-------------|-------------|-------------|----------------|
| C12         | O11         | C1          | 115.6(4)       | C8          | C7          | C6          | 122.5(5)       |
| C10         | C1          | O11         | 119.9(5)       | C8          | C7          | C2          | 119.2(5)       |
| C10         | C1          | C2          | 122.3(5)       | C6          | C7          | C2          | 118.3(6)       |
| O11         | C1          | C2          | 117.7(5)       | C19         | C14         | C15         | 117.7(6)       |
| C3          | C2          | C1          | 123.9(4)       | C19         | C14         | C20         | 123.9(5)       |
| C3          | C2          | C7          | 119.0(5)       | C15         | C14         | C20         | 118.4(6)       |
| C1          | C2          | C7          | 117.1(5)       | C26         | C25         | C24         | 121.5(6)       |
| C12         | C21         | C20         | 112.2(4)       | C29         | C24         | C25         | 117.6(5)       |
| C12         | C21         | C22         | 117.1(4)       | C29         | C24         | C22         | 123.3(5)       |
| C20         | C21         | C22         | 89.6(3)        | C25         | C24         | C22         | 119.1(5)       |
| O13         | C12         | O11         | 121.6(4)       | C4          | C3          | C2          | 120.7(5)       |
| O13         | C12         | C21         | 126.9(4)       | C24         | C29         | C28         | 121.1(6)       |
| O11         | C12         | C21         | 111.5(4)       | C9          | C8          | C7          | 121.2(5)       |
| C30         | C23         | C22         | 114.5(4)       | C3          | C4          | C5          | 120.5(6)       |
| C30         | C23         | C20         | 115.6(4)       | C26         | C27         | C28         | 119.8(5)       |
| C22         | C23         | C20         | 90.1(3)        | C1          | C10         | C9          | 120.2(6)       |
| C14         | C20         | C21         | 117.8(4)       | C8          | C9          | C10         | 120.0(6)       |
| C14         | C20         | C23         | 118.4(4)       | C6          | C5          | C4          | 120.4(6)       |
| C21         | C20         | C23         | 89.3(4)        | C16         | C15         | C14         | 120.6(8)       |
| C24         | C22         | C23         | 120.9(4)       | C27         | C26         | C25         | 120.3(6)       |
| C24         | C22         | C21         | 120.4(4)       | C14         | C19         | C18         | 121.4(7)       |
| C23         | C22         | C21         | 89.9(4)        | C27         | C28         | C29         | 119.6(6)       |
| O32         | C30         | O31         | 119.6(5)       | C17         | C18         | C19         | 119.6(8)       |
| O32         | C30         | C23         | 124.3(5)       | C17         | C16         | C15         | 120.6(8)       |
| O31         | C30         | C23         | 116.1(5)       | C16         | C17         | C18         | 120.1(8)       |
| C5          | C6          | C7          | 121.1(6)       |             |             |             |                |

**Table S6.** Hydrogen Atom Coordinates ( $\text{\AA}\times 10^4$ ) and Isotropic Displacement Parameters ( $\text{\AA}^2\times 10^3$ ) for (*R,R,R,R*)-SB-FI-26 (**3-A**).

| <b>Atom</b> | <b>x</b> | <b>y</b>  | <b>z</b> | <b>U(eq)</b> |
|-------------|----------|-----------|----------|--------------|
| H31         | 10571    | 13307     | 12172    | 97           |
| H21         | 9578     | 11223     | 11194    | 49           |
| H23         | 11581    | 13949     | 11731    | 51           |
| H20         | 12870    | 11494     | 11614    | 54           |
| H22         | 7837     | 13368     | 11376    | 49           |
| H6          | 18210    | 15093     | 10052    | 82           |
| H25         | 7062     | 15119     | 11010    | 61           |
| H3          | 11955    | 14922     | 10641    | 64           |
| H29         | 12958    | 15624     | 11408    | 71           |
| H8          | 19090    | 12258     | 10168    | 82           |
| H4          | 12791    | 17185     | 10393    | 82           |
| H27         | 10873    | 18935     | 10860    | 77           |
| H10         | 15089    | 9878      | 10699    | 74           |
| H9          | 18172    | 9949      | 10395    | 86           |
| H5          | 15931    | 17265     | 10098    | 92           |
| H15         | 12642    | 9678      | 11990    | 93           |
| H26         | 7688     | 17457     | 10772    | 75           |
| H19         | 7310     | 10013     | 11481    | 79           |
| H28         | 13548    | 18013     | 11176    | 80           |
| H18         | 5770     | 7773      | 11686    | 101          |
| H16         | 11050    | 7454      | 12196    | 134          |
| H17         | 7728     | 6459      | 12036    | 126          |
| H33A        | 2903     | 14894     | 12590    | 142          |
| H33B        | 4574     | 15632     | 12370    | 142          |
| H33C        | 5386     | 14247     | 12567    | 142          |
| H1          | 4600(70) | 13230(50) | 12182(7) | 10(3)        |



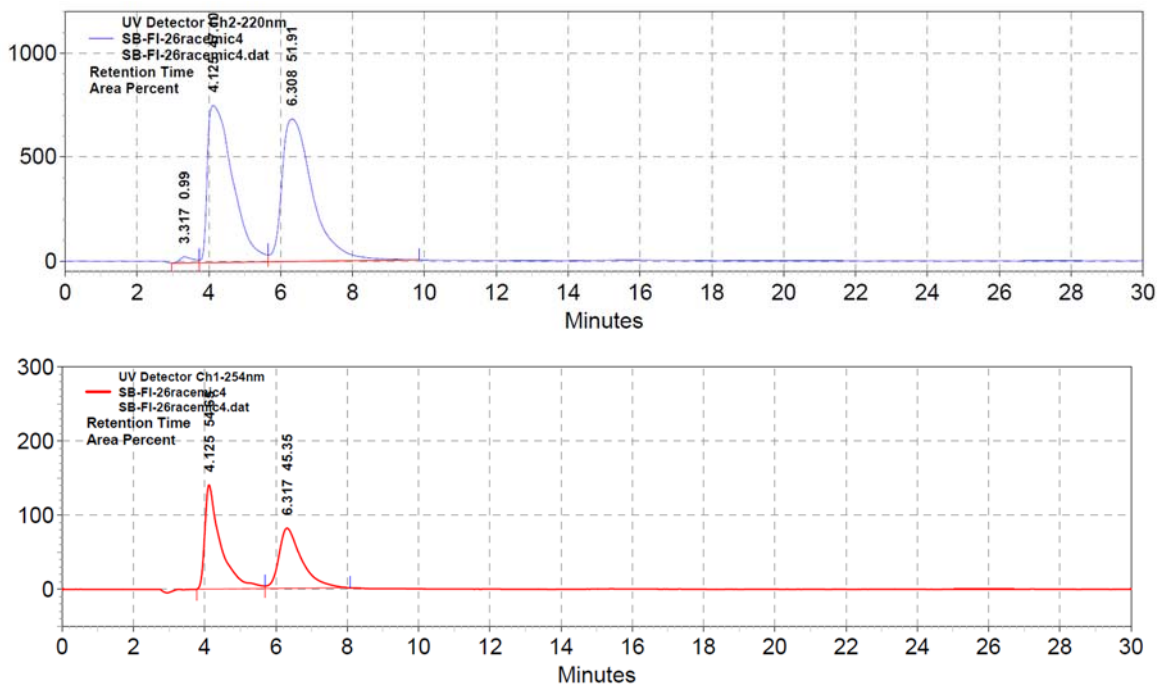

**Figure S2.** Separation of two enantiomers of SB-FI-26 using racemic SB-FI-26 (65%: 35% isopropanol: hexanes Chiralcel ODH).

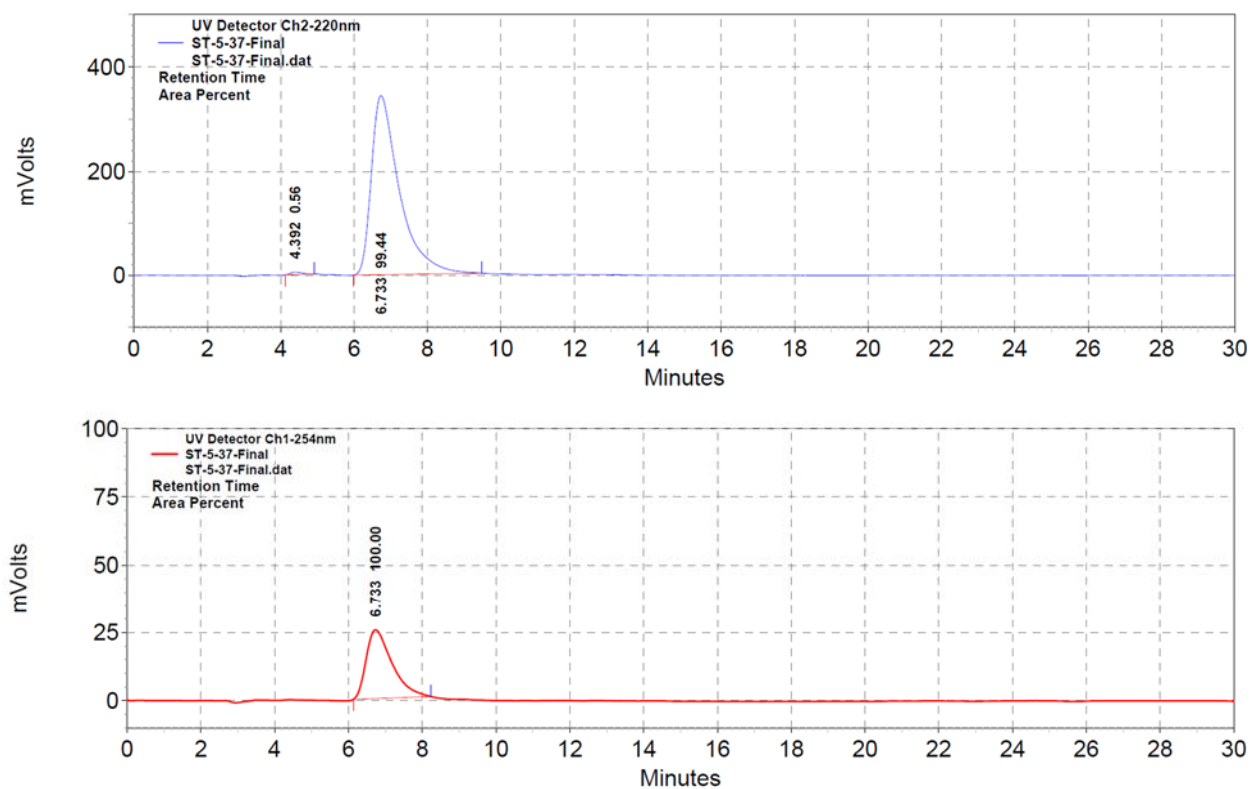

**Figure S3.** Optical resolution of *rac*-SB-FI-26 with L-phenylalaninol, giving SB-FI-26A (**3-A**), i.e., (*R,R,R,R*)-SB-FI-26 (65%: 35% isopropanol: hexanes Chiralcel ODH).

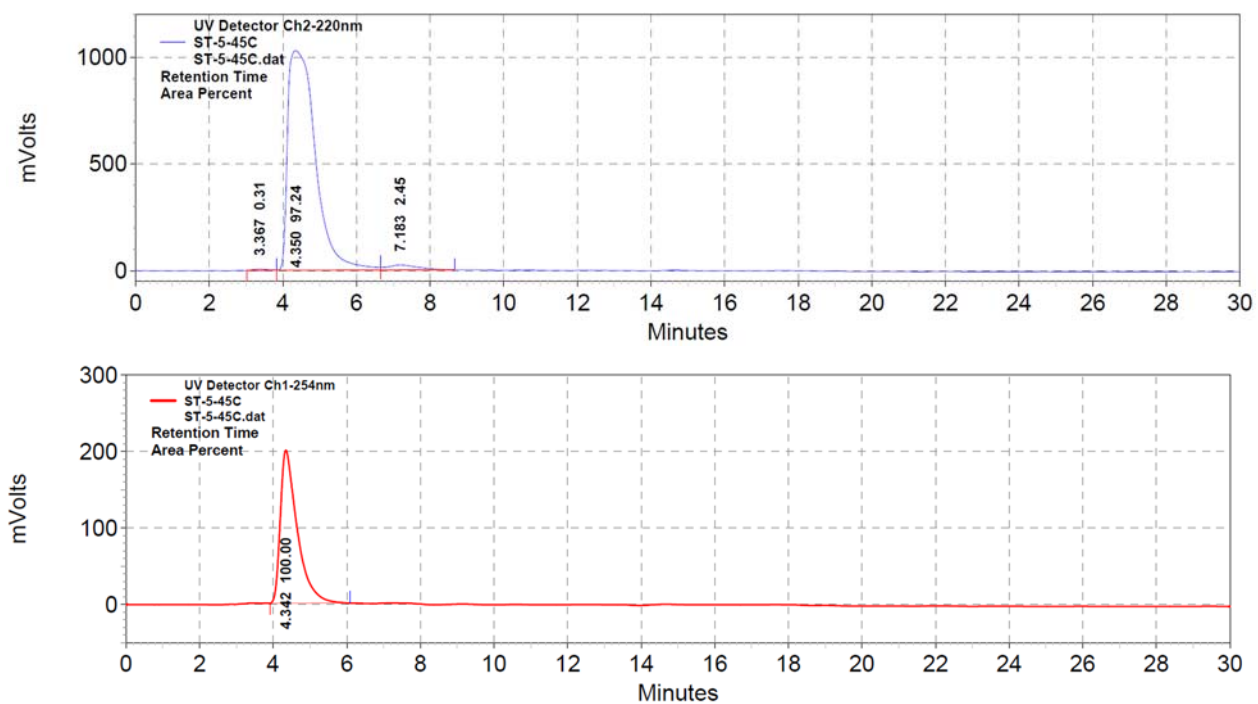

**Figure S4.** Optical resolution *rac*-SB-FI-26 with D-phenylalaninol, giving SB-FI-26B (**3-B**), i.e., (*S,S,S,S*)-SB-FI-26 (65%: 35% isopropanol: hexanes Chiralcel ODH).

**Table S7.** Docking energy scores and cLogP values of **3**-analogs for FABP5 and FABP7

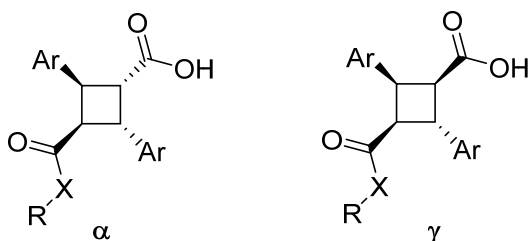

| Compound*                       | Ar | X | R                                     | FABP5<br>(kcal/mol) | FABP7<br>(kcal/mol) | cLogP | Selected<br>for<br>synthesis |
|---------------------------------|----|---|---------------------------------------|---------------------|---------------------|-------|------------------------------|
| <i>(R,R,R,R)</i> - <b>3</b>     | Ph | O | 1-naphthyl                            | -7.95               | -9.46               | 6.97  | ✓                            |
| <i>(S,S,S,S)</i> - <b>3</b>     | Ph | O | 1-naphthyl                            | -8.17               | -9.49               | 6.97  | ✓                            |
| <b>3a</b>                       | Ph | O | benzyl                                | -8.14               | -8.77               | 5.28  | ✓                            |
| <b>3b</b>                       | Ph | O | 4-MeO-benzyl                          | -7.60               | -8.92               | 5.20  | ✓                            |
| <b>3c</b>                       | Ph | O | 4-F-benzyl                            | -7.86               | -7.79               | 5.42  | ✓                            |
| <b>3d</b>                       | Ph | O | 4-Br-benzyl                           | -8.40               | -8.27               | 6.13  | ✓                            |
| <b>3e</b>                       | Ph | O | 2-iodophenyl                          | -8.15               | -9.98               | 5.77  | ✓                            |
| <b>3f</b>                       | Ph | O | 3-ethynylphenyl                       | -7.39               | -8.88               | 5.06  | ✓                            |
| <b>3g</b>                       | Ph | O | biphenyl-2-yl                         | -8.75               | -9.94               | 6.12  | ✓                            |
| <b>3h</b>                       | Ph | O | biphenyl-3-yl                         | -7.63               | -8.91               | 6.68  | ✓                            |
| <b>3i</b>                       | Ph | O | biphenyl-4-yl                         | -8.21               | -8.13               | 6.68  | ✓                            |
| <b>3j</b>                       | Ph | O | 2'-HO-biphenyl-2-yl                   | -8.06               | -9.24               | 5.19  | ✓                            |
| <b>3k</b>                       | Ph | O | 2,4,5-trichlorophenyl                 | -8.44               | -9.10               | 6.67  | ✓                            |
| <b>3l-a</b><br><i>(R,R,R,R)</i> | Ph | O | <i>(1R,2S)</i> -2-phenylcyclohex-1-yl | -8.86               | -10.25              | 7.17  | ✓                            |
| <b>3l-b</b><br><i>(S,S,S,S)</i> | Ph | O | <i>(1S,2R)</i> -2-phenylcyclohex-1-yl | -8.40               | -10.20              | 7.17  | ✓                            |
| <b>3l-c</b><br><i>(S,S,S,S)</i> | Ph | O | <i>(1R,2S)</i> -2-phenylcyclohex-1-yl | -8.53               | -10.56              | 7.17  | ✓                            |
| <b>3l-d</b><br><i>(R,R,R,R)</i> | Ph | O | <i>(1S,2R)</i> -2-phenylcyclohex-1-yl | -8.70               | -10.48              | 7.17  | ✓                            |
| <b>3m</b>                       | Ph | O | Indan-2-yl                            | -9.27               | -8.63               | 5.56  | ✓                            |
| <b>3n</b>                       | Ph | O | CF <sub>3</sub> CH <sub>2</sub> -     | -6.36               | -7.20               | 3.87  | ✓                            |
| <b>3o</b>                       | Ph | O | 6-acetamidonaphth-1-yl                | -8.92               | -10.08              | 5.10  | ✓                            |
| <b>3p</b>                       | Ph | O | 5-ethynyl-naphth-1-yl                 | -7.63               | -9.21               | 6.23  | ✓                            |
| <b>3q</b>                       | Ph | O | 9-fluorenylmethyl                     | -8.53               | -10.77              | 7.10  | ✓                            |
| <b>3r</b>                       | Ph | O | cyclohexyl                            | -6.47               | -9.30               | 5.61  | ✓                            |

|             |                         |    |                                                         |        |        |       |   |
|-------------|-------------------------|----|---------------------------------------------------------|--------|--------|-------|---|
| <b>3s</b>   | Ph                      | O  | 3-[1-(3,6,9-trioxa-dodecanyl)-1,2,3-triazol-4-yl]phenyl | -5.47  | -8.94  | 4.49  | ✓ |
| <b>3o-γ</b> | Ph                      | O  | 6-acetamidonaphth-1-yl                                  | -7.69  | -8.94  | 5.10  | ✓ |
| <b>4a</b>   | 3-MeO-4-HO-Ph           | O  | 1-naphthyl                                              | -7.04  | -8.05  | 4.33  | ✓ |
| <b>4b</b>   | 2-MeO-Ph                | O  | 1-naphthyl                                              | -8.59  | -8.90  | 5.00  | ✓ |
| <b>4c</b>   | 2-O <sub>2</sub> N-Ph   | O  | 1-naphthyl                                              | -9.37  | -10.75 | 5.29  | ✓ |
| <b>4d</b>   | 4-HO-Ph                 | O  | 1-naphthyl                                              | -8.14  | -9.23  | 4.63  | ✓ |
| <b>4e</b>   | 2-MeO-Ph                | O  | (1 <i>R</i> ,2 <i>S</i> )-2-phenylcyclohex-1-yl         | -7.99  | -9.29  | 6.20  | ✓ |
| <b>4f</b>   | 2-Cl-Ph                 | O  | (1 <i>R</i> ,2 <i>S</i> )-2-phenylcyclohex-1-yl         | -8.37  | -11.22 | 8.59  | ✓ |
| <b>4g</b>   | 2,6-Cl <sub>2</sub> -Ph | O  | (1 <i>R</i> ,2 <i>S</i> )-2-phenylcyclohex-1-yl         | -8.49  | -11.87 | 10.01 | ✓ |
| <b>4h</b>   | 2-Br-Ph                 | O  | (1 <i>R</i> ,2 <i>S</i> )-2-phenylcyclohex-1-yl         | -9.09  | -10.45 | 8.89  | ✓ |
| <b>4i</b>   | 2-O <sub>2</sub> N-Ph   | O  | (1 <i>R</i> ,2 <i>S</i> )-2-phenylcyclohex-1-yl         | -10.01 | -10.57 | 6.49  | ✓ |
| <b>4j</b>   | 2-MeO-Ph                | O  | 9-fluorenylmethyl                                       | -8.41  | -9.77  | 6.14  | ✓ |
| <b>4k</b>   | 2-Cl-Ph                 | O  | 9-fluorenylmethyl                                       | -8.76  | -11.09 | 8.52  | ✓ |
| <b>4l</b>   | 2-MeO-Ph                | O  | quinolin-5-yl                                           | -8.42  | -9.10  | 4.89  | ✓ |
| <b>5a</b>   | Ph                      | O  | benzyl                                                  | -6.85  | -8.55  | 7.50  | ✓ |
| <b>5b</b>   | Ph                      | O  | 4-MeO-benzyl                                            | -7.09  | -8.00  | 7.33  | ✓ |
| <b>5c</b>   | Ph                      | O  | 4-F-benzyl                                              | -7.13  | -8.30  | 7.78  | ✓ |
| <b>5d</b>   | Ph                      | O  | tetrahydropyran-4-ylmethyl                              | -6.85  | -8.83  | 3.97  | ✓ |
| <b>5e</b>   | Ph                      | O  | biphenyl-3-yl                                           | -8.47  | -10.14 | 10.29 | ✓ |
| <b>6a</b>   | Ph                      | NH | 4-(5,6,7,8-tetrahydronaphth-2-yl)thiazol-2-yl           | -9.60  | N.D.** | 7.48  | ✓ |
| <b>6b</b>   | Ph                      | NH | biphenyl-4-yl                                           | -6.32  | -8.36  | 6.46  | ✓ |
| <b>6a-γ</b> | Ph                      | NH | 4-(5,6,7,8-tetrahydronaphth-2-yl)thiazol-2-yl           | -8.05  | N.D.** | 7.48  | ✓ |
|             | Ph                      | O  | 2-(trifluoromethyl)phenyl                               | -6.89  | -8.01  | 5.92  |   |
|             | Ph                      | O  | 6,7-dihydro-5H-cyclopenta[d]pyridazin-6-yl              | -6.71  | -8.48  | 2.83  |   |
|             | Ph                      | O  | 5-((trifluoromethoxy)methyl)naphthalen-1-yl             | -6.85  | -7.86  | 6.73  |   |
|             | Ph                      | NH | 4-cyanophenyl                                           | -6.43  | -7.62  | 4.61  |   |
|             | Ph                      | O  | 2,4-dimethoxyphenyl                                     | -6.15  | -7.15  | 4.52  |   |
|             | 4-O <sub>2</sub> N-Ph   | O  | 3-chloropyridin-4-yl                                    | -6.03  | -6.78  | 3.72  |   |
|             | 2-NH <sub>2</sub> -Ph   | O  | quinolin-5-yl                                           | -6.44  | -7.48  | 2.30  |   |

4-O<sub>2</sub>N-Ph O quinolin-5-yl -6.23 -7.08 4.46

---

\***1x**: unsubstituted and substituted  $\alpha$ -truxillic acid; **3x**:  $\alpha$ -truxillic acid mono ester; **3o- $\gamma$** :  $\gamma$ -truxillic acid mono ester; **4x**: substituted  $\gamma$ -truxillic acid mono ester; **5x**:  $\alpha$ -truxillic acid mono ester; **6x**:  $\alpha$ -truxillic acid mono amide; **6a- $\gamma$** :  $\gamma$ -truxillic acid mono amide). \*\*The compound does not fit into the binding pocket.

### Protein Expression and Purification of FABP3

pET28a vector consisting of human FABP3 gene was expressed in BL21(DE3) strain. Cells were grown at 37 °C to OD<sub>600</sub> = 0.5-0.6 before being induced with 0.5 mM IPTG and were expressed at 16 °C for 16 hours. Cells were harvested by centrifugation and were lysed by passing through a Microfluidizer cell disruptor in 10 mM potassium phosphate (pH 8.0), 10 mM imidazole, and 0.25 M NaCl. The homogenate was clarified by spinning at 27,000g, and the supernatant was applied to a HiTrap-Ni column (GE Healthcare) pre-equilibrated with the lysis buffer. His-tagged FABP3 was eluted with a 10–300 mM imidazole gradient in 10mM potassium phosphate (pH 8.0) and 0.25 M NaCl. To remove the N-terminal His-tag, FABP3 was incubated with thrombin overnight at 4 °C in 50 mM Tris (pH 8.5) and 0.15 M NaCl. After clearing the undigested His-FABPs by passing through HiTrap-Ni column, FABP3 was applied to a Superdex 75 column (16 x 1000 mm, GE Healthcare) equilibrated with 10mM Tris (pH 8.5), 1 mM dithiothreitol, and 0.15 M NaCl. Delipidation was performed by incubating FABP3 with hydroxyalkoxypropyl-dextran (Sigma) for 1 hour at 37 °C. The purified FABP3 was concentrated to 50 mg/ml for crystallization.

### Crystallization and structure determination of FABP3

Before crystallization, FABP3 was incubated with SBF1-26 at room temperature for 30 min at a molar ratio of 1: 2 (protein: ligand). FABP3 crystals were grown at 293 °K by sitting-drop vapor diffusion method using 0.1 M sodium cacodylate pH 7.0, and 2.3 M ammonium sulfate as the mother liquor. Diffraction data to resolution of 1.4Å were collected at Lilly Research Laboratories Collaborative Access Team (LRL-CAT) beamline of Advanced Photon Source (APS), Argonne National Laboratory, and were processed with Mosflm software. The space group of FABP3 crystal was P21 and the structure was solved by molecular replacement program PHASER using previously solved FABP3 structure (PDB ID: 1HMS) as initial search model. However, we only found endogenous palmitic acid from *E. coli* in the ligand binding pocket. Crystallographic data are summarized in Table S7.

**Table S8. Data collection and refinement statistics for FABP3**

|                                                     | Human FABP3                 |
|-----------------------------------------------------|-----------------------------|
| <b>Data collection</b>                              |                             |
| Wavelength                                          | 0.97931                     |
| Space group                                         | P 1 21 1                    |
| Cell dimensions                                     |                             |
| <i>a</i> , <i>b</i> , <i>c</i> (Å)                  | 43.50, 52.90, 55.51         |
| $\alpha$ , $\beta$ , $\gamma$ (°)                   | 90.00, 97.45, 90.00         |
| Resolution (Å)                                      | 20.39 – 1.40 (1.48 - 1.40)* |
| <i>R</i> <sub>merge</sub> (%)                       | 6.0 (31.8)                  |
| <i>I</i> / $\sigma I$                               | 14.0 (4.4)                  |
| Total reflections                                   | 203192                      |
| Completeness (%)                                    | 96.6 (95)                   |
| Redundancy                                          | 4.3 (4.3)                   |
| <b>Refinement</b>                                   |                             |
| Resolution (Å)                                      | 19.54 – 1.40                |
| No. reflections                                     | 47498                       |
| <i>R</i> <sub>work</sub> / <i>R</i> <sub>free</sub> | 0.1702 / 0.1979             |
| No. of non-hydrogen atoms                           | 2634                        |
| Protein                                             | 2216                        |
| Ligand                                              | 56                          |
| Water                                               | 362                         |
| <i>B</i> -factors                                   | 15.07                       |
| Protein                                             | 13.29                       |
| Ligand/ion                                          | 20.97                       |
| Water                                               | 25.08                       |
| R.m.s. deviations                                   |                             |
| Bond lengths (Å)                                    | 0.005                       |
| Bond angles (°)                                     | 0.781                       |
| Ramachandran statistics (%)                         |                             |
| Favored                                             | 99.3                        |
| Allowed                                             | 0.7                         |
| Outliers                                            | 0                           |

\*Values in parentheses are for highest-resolution shell.

## Autodock 4.2 Parameters

### **Docking (Lamarckian Genetic Algorithm)**

```
rmstol 2.0          # cluster_tolerance/A
extnrg 1000.0       # external grid energy
e0max 0.0 10000     # max initial energy; max number of retries
ga_pop_size 150     # number of individuals in population
ga_num_evals 2500000 # maximum number of energy evaluations
ga_num_generations 27000 # maximum number of generations
ga_elitism 1        # number of top individuals to survive to next generation
ga_mutation_rate 0.02 # rate of gene mutation
ga_crossover_rate 0.8 # rate of crossover
ga_window_size 10   #
ga_cauchy_alpha 0.0 # Alpha parameter of Cauchy distribution
ga_cauchy_beta 1.0  # Beta parameter Cauchy distribution
set_ga              # set the above parameters for GA or LGA
sw_max_its 300      # iterations of Solis & Wets local search
sw_max_succ 4       # consecutive successes before changing rho
sw_max_fail 4       # consecutive failures before changing rho
sw_rho 1.0          # size of local search space to sample
sw_lb_rho 0.01      # lower bound on rho
ls_search_freq 0.06 # probability of performing local search on individual
set_psw1           # set the above pseudo-Solis & Wets parameters
unbound_model bound # state of unbound ligand
ga_run 10           # do this many hybrid GA-LS runs
```

### **Energy Minimization Parameters**

```
rmstol 1.0          # cluster_tolerance/A
extnrg 1000.0       # external grid energy
e0max 0.0 10000     # max initial energy; max number of retries
ga_pop_size 1500    # number of individuals in population
sw_max_its 30000     # iterations of Solis & Wets local search
sw_max_succ 20       # consecutive successes before changing rho
sw_max_fail 20       # consecutive failures before changing rho
sw_rho 1000.0       # size of local search space to sample
sw_lb_rho 0.01      # lower bound on rho
set_psw1           # set the above pseudo-Solis & Wets parameters
unbound_model bound # state of unbound ligand
do_local_only 50    # do this many
```

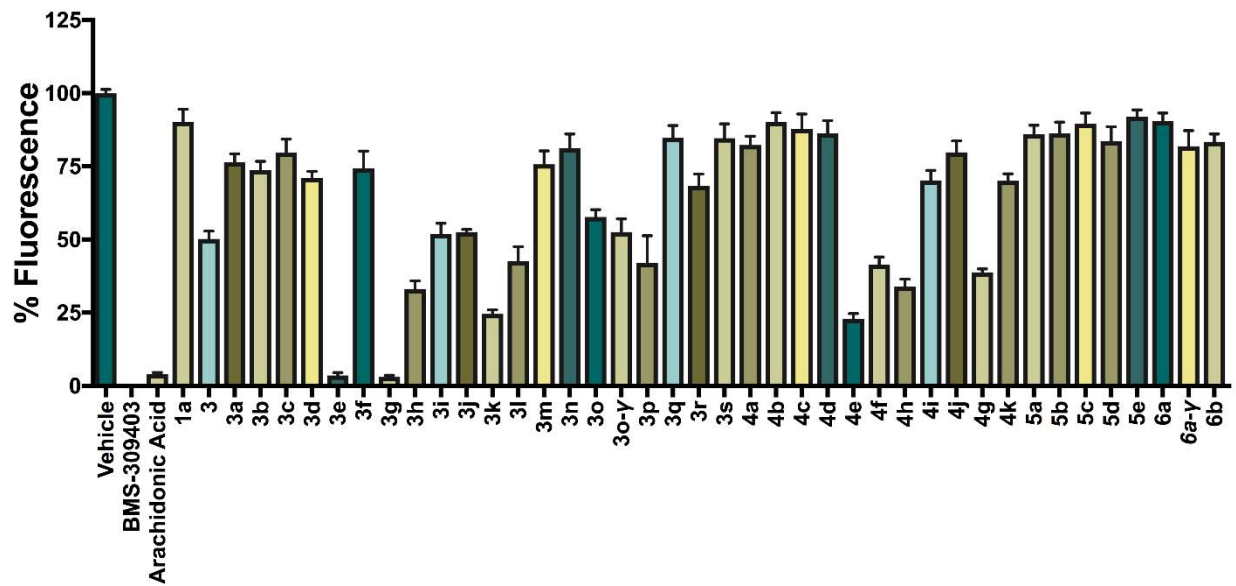

**Figure S5.** Binding of inhibitors to FABP4. Displacement of ANS from purified human FABP4 by each compound (10  $\mu$ M). Data expressed as mean  $\pm$  SEM relative to vehicle.



<sup>1</sup>H NMR of Compound **1a**

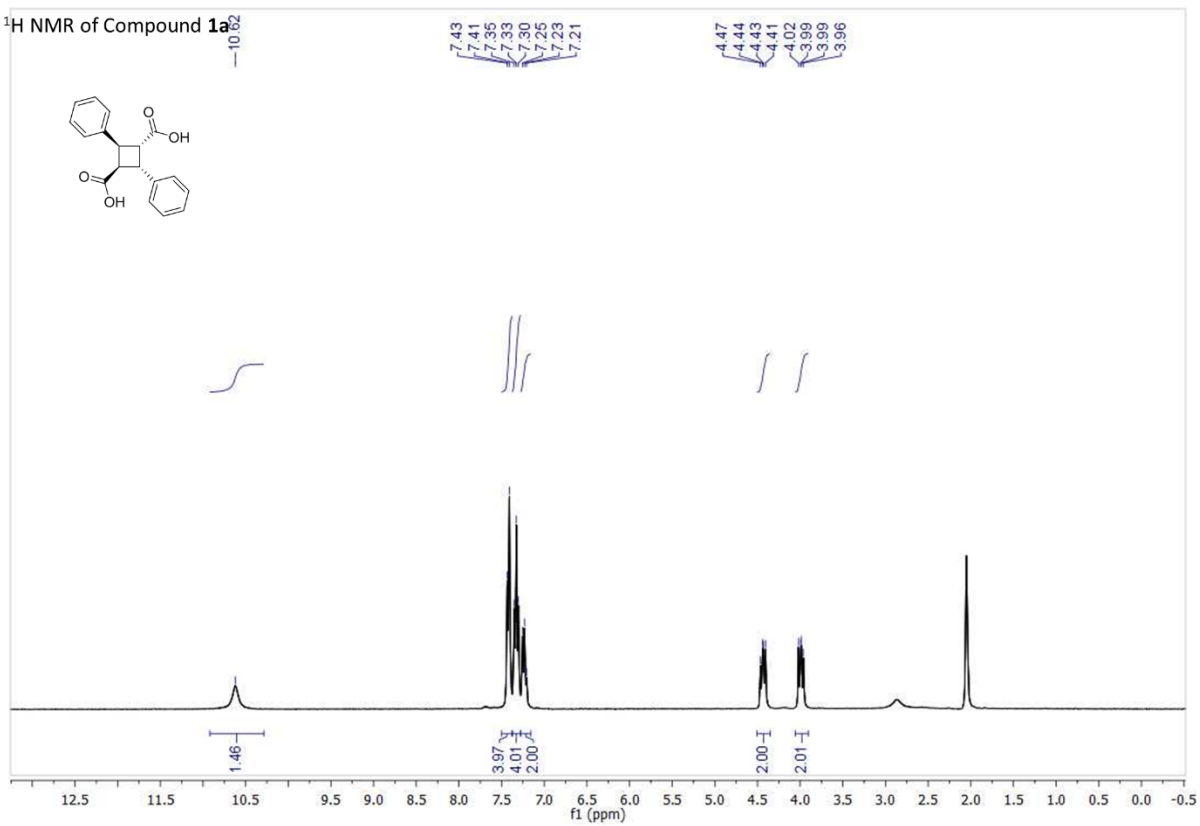

<sup>1</sup>H NMR of Compound 1b

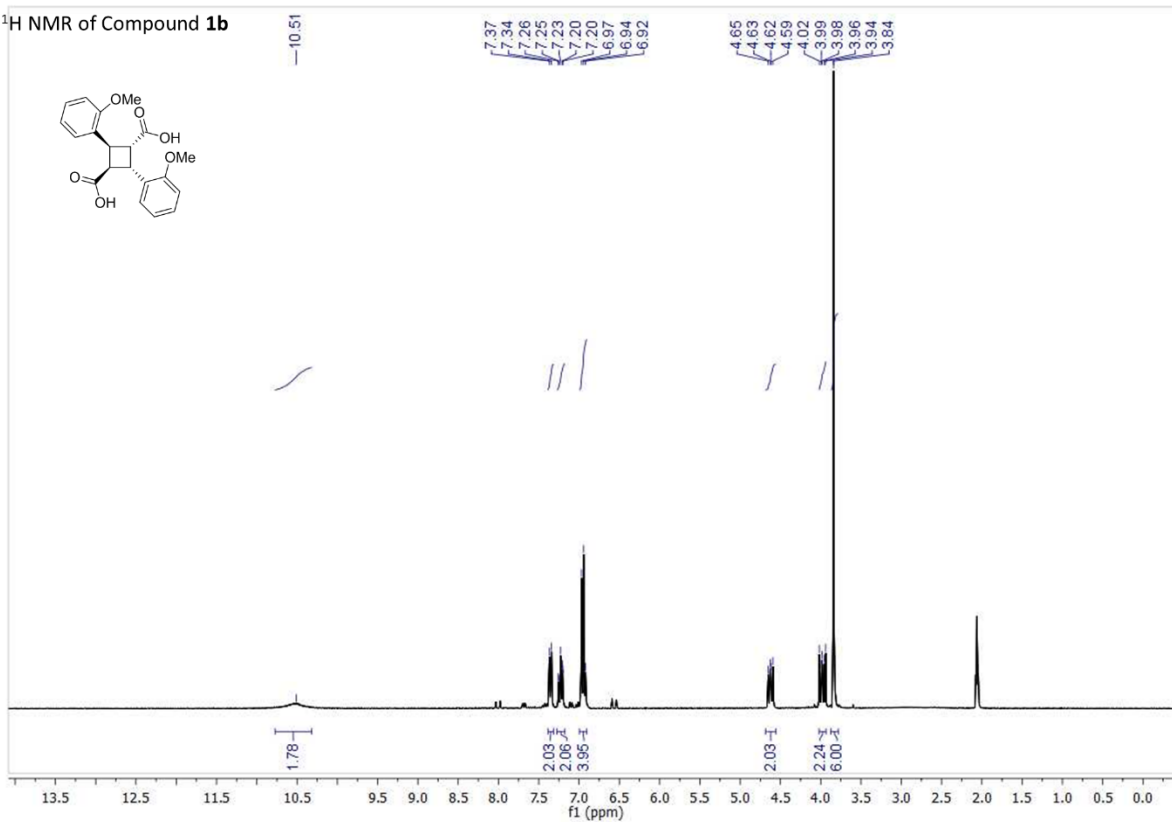

<sup>13</sup>C NMR of Compound 1b

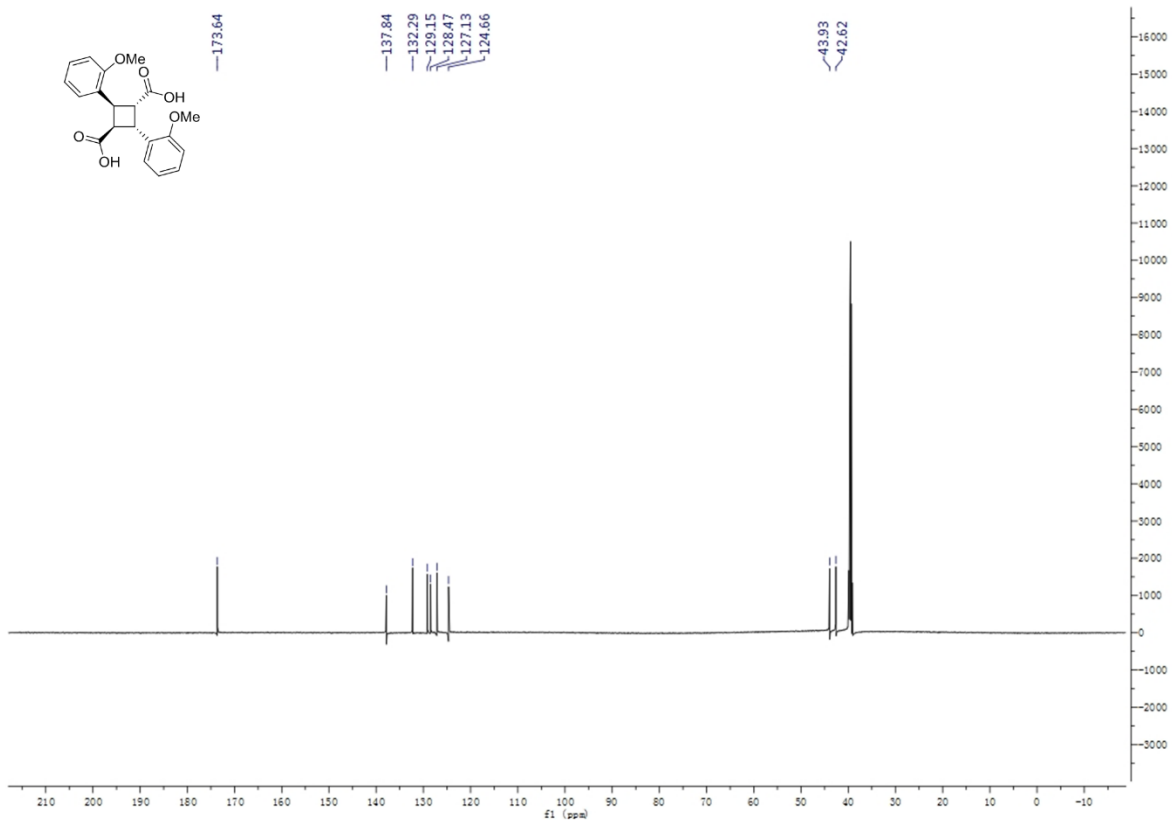

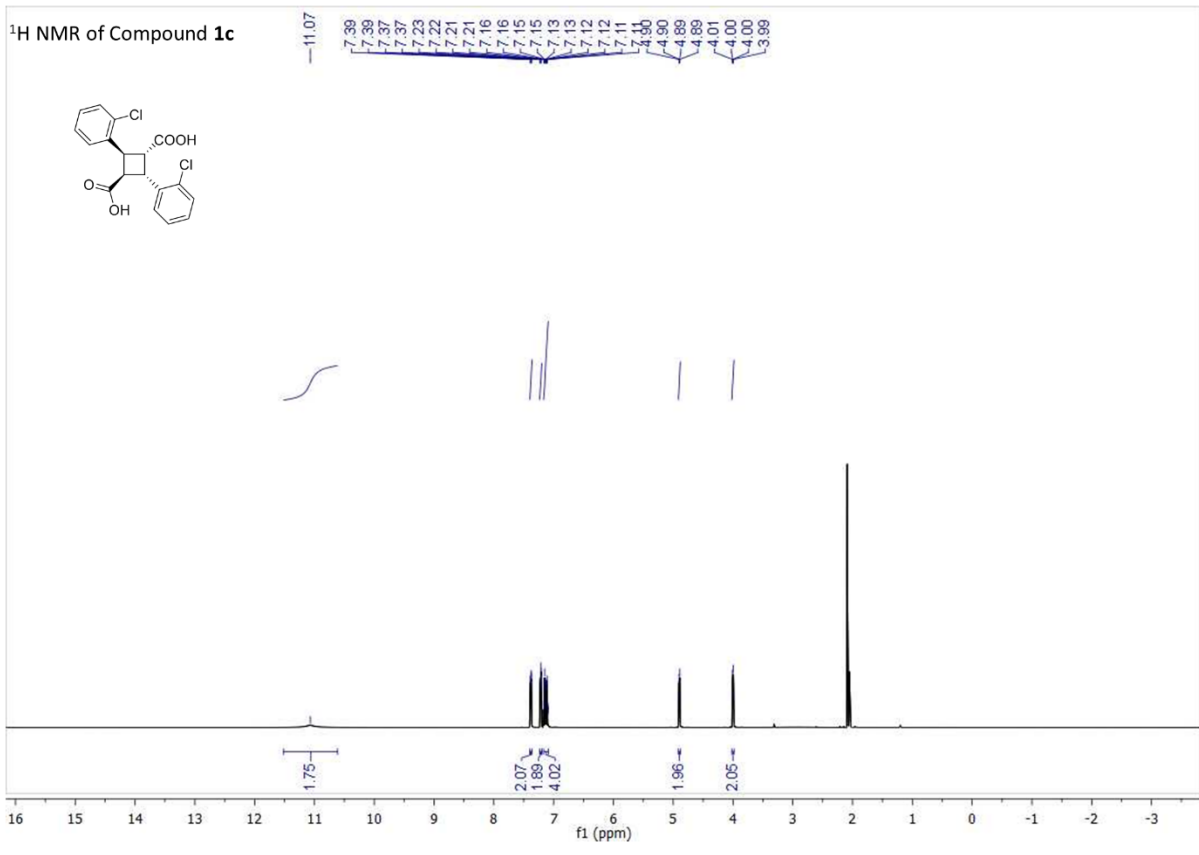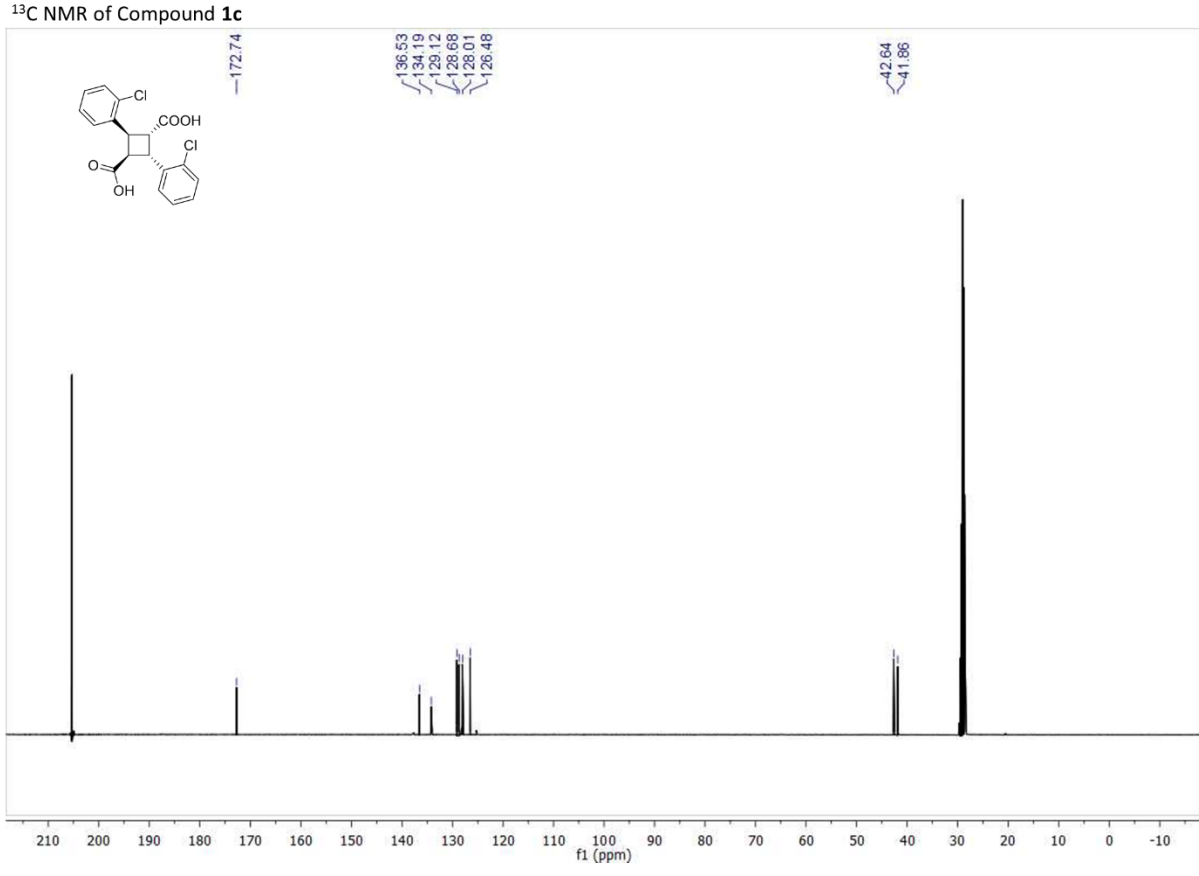

<sup>1</sup>H NMR of Compound 1d

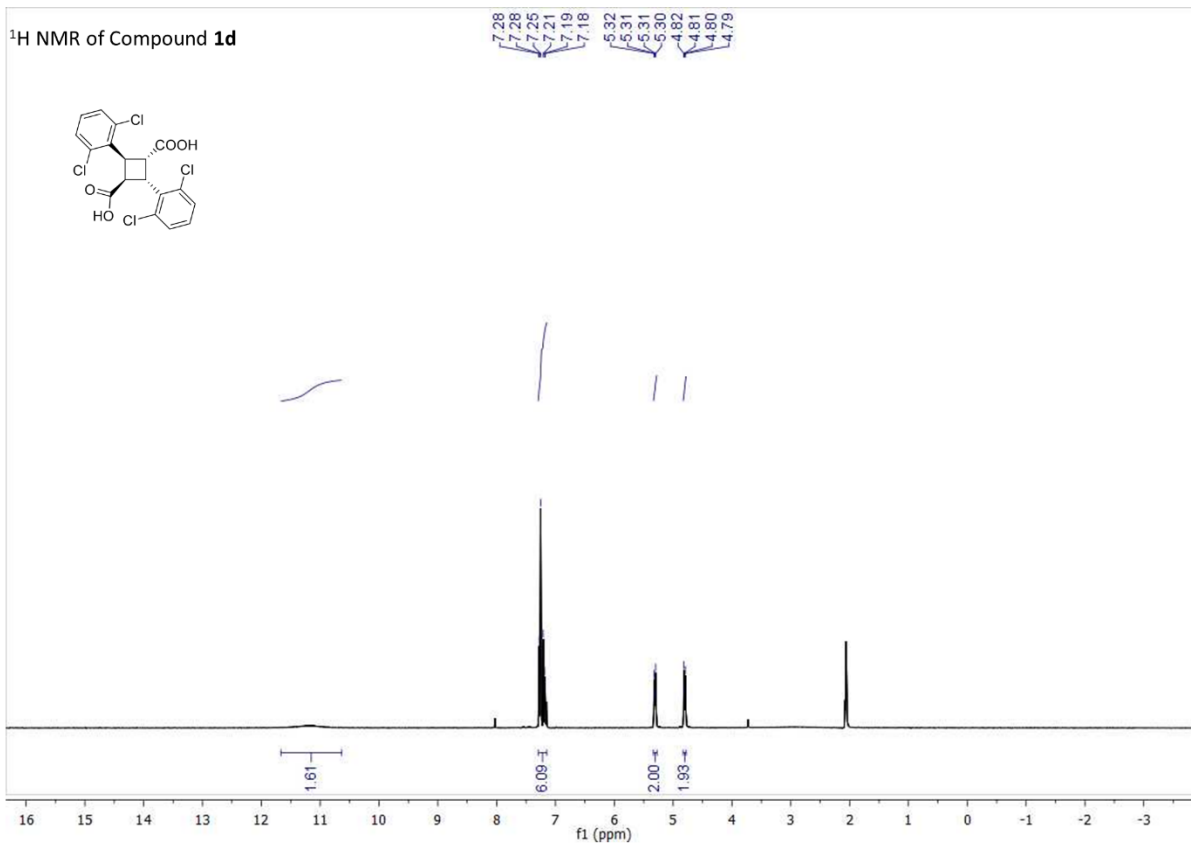

<sup>13</sup>C NMR of Compound 1d

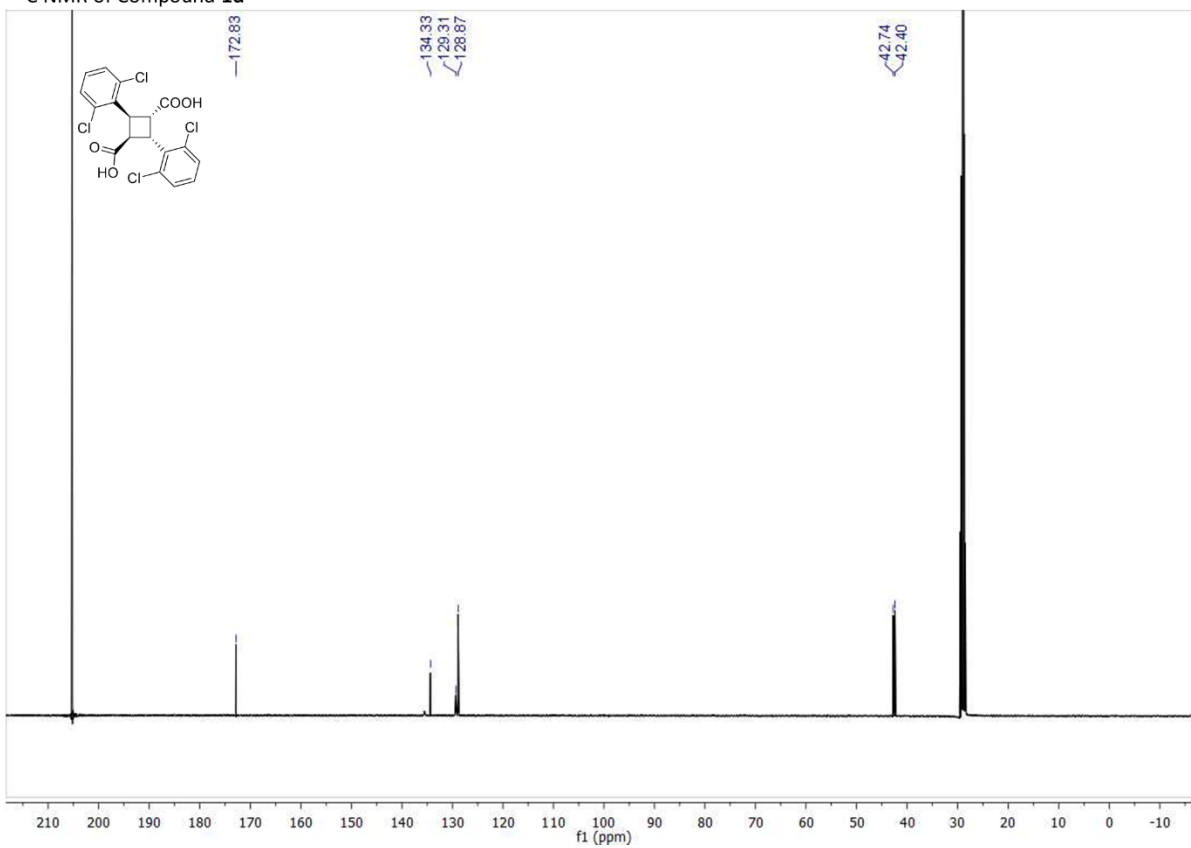

<sup>1</sup>H NMR of Compound 1e

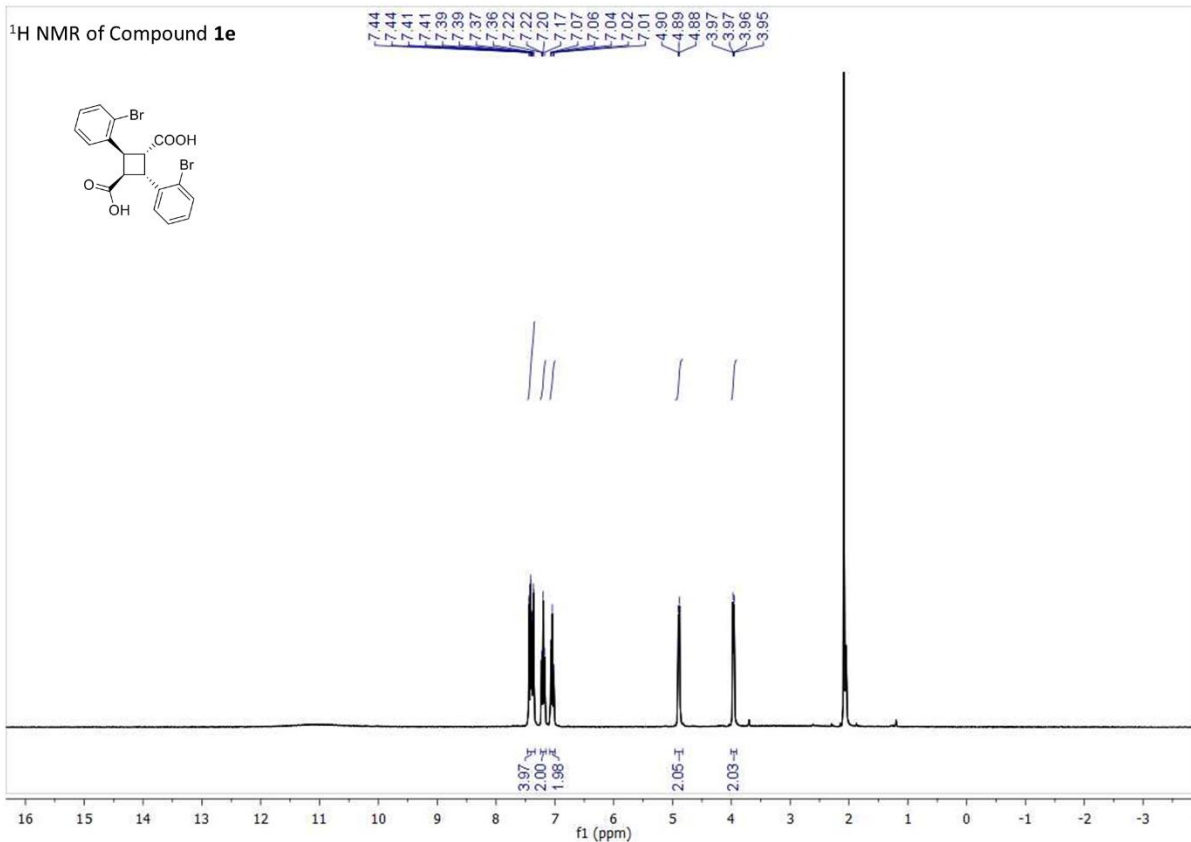

<sup>13</sup>C NMR of Compound 1e

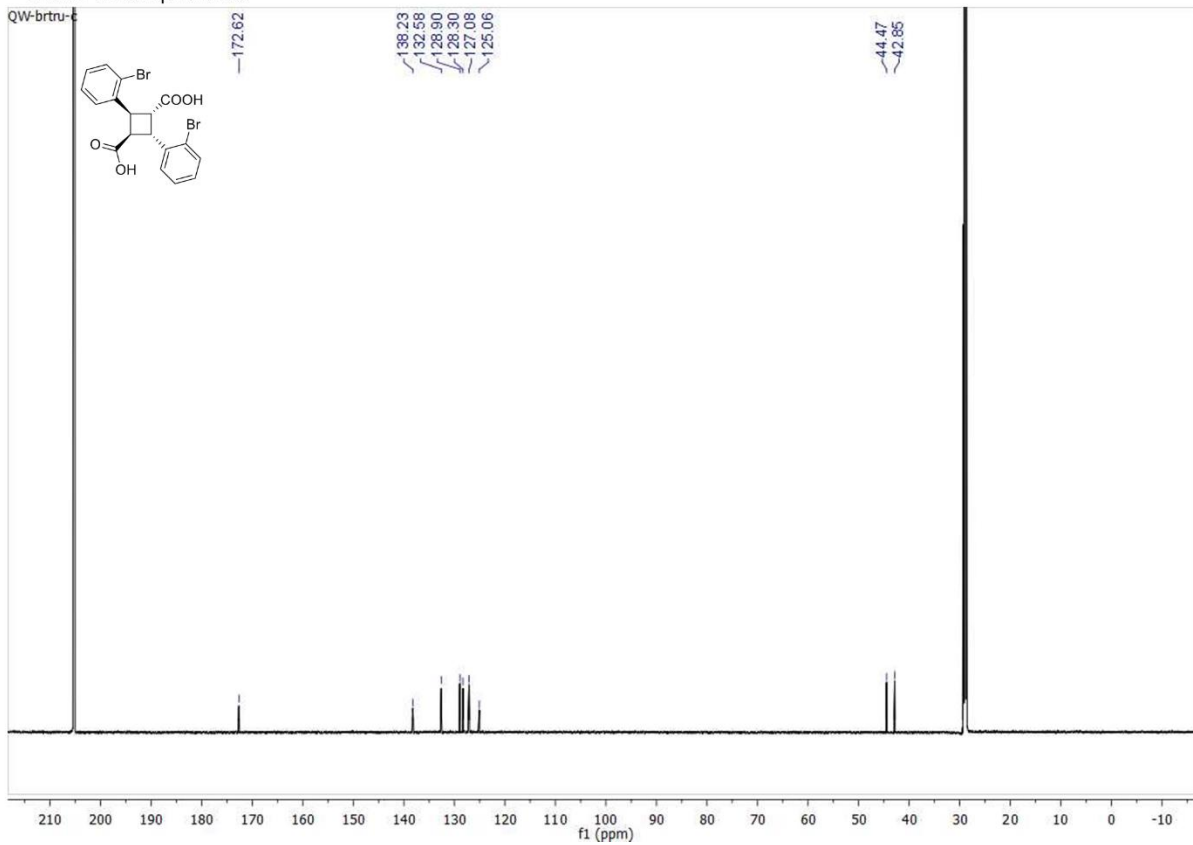

<sup>1</sup>H NMR of Compound 1f

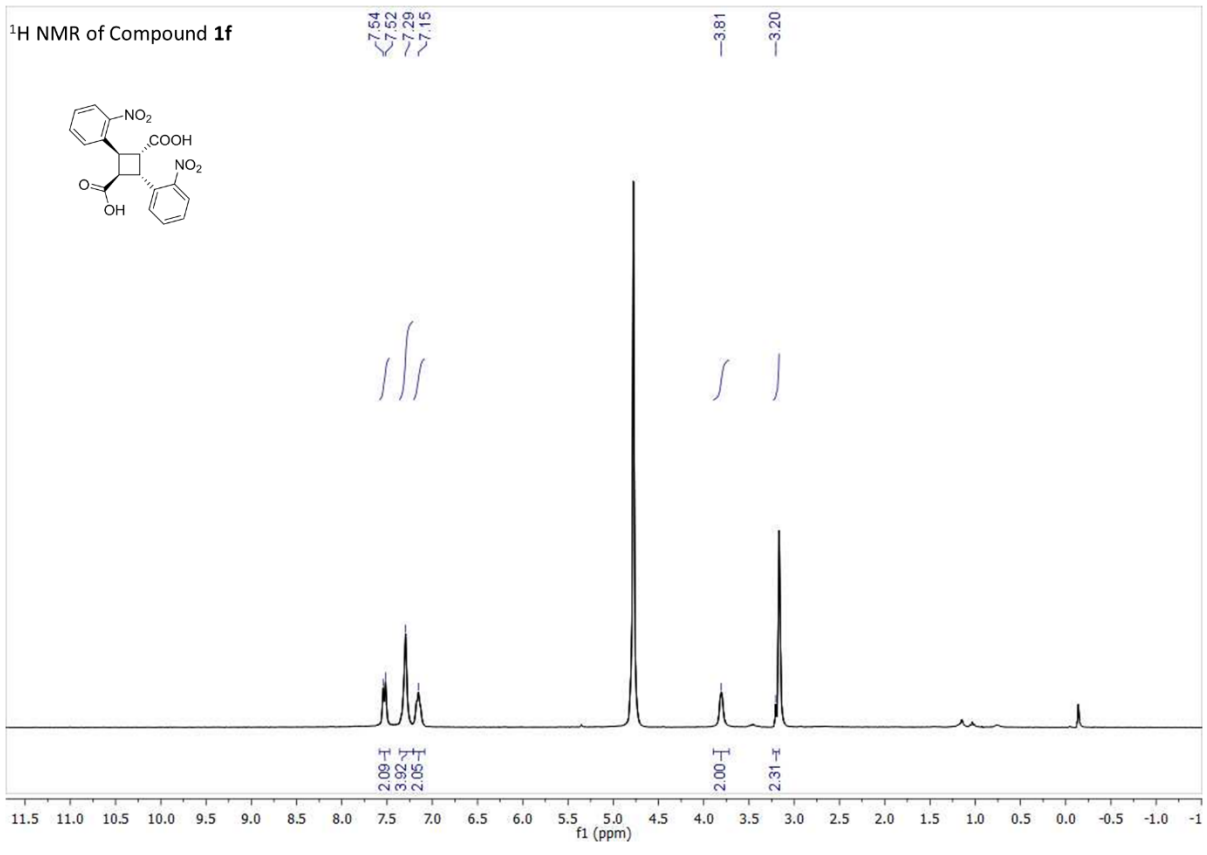

<sup>13</sup>C NMR of Compound 1f

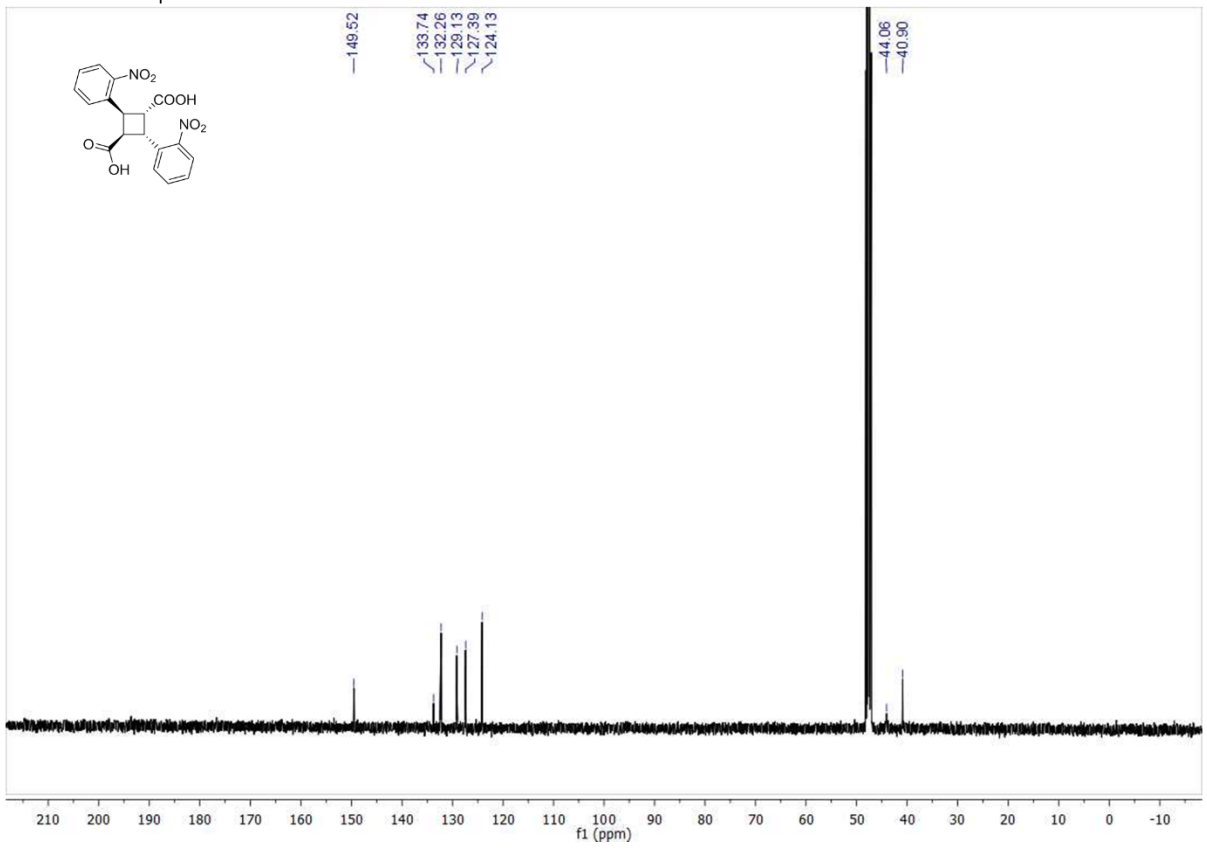

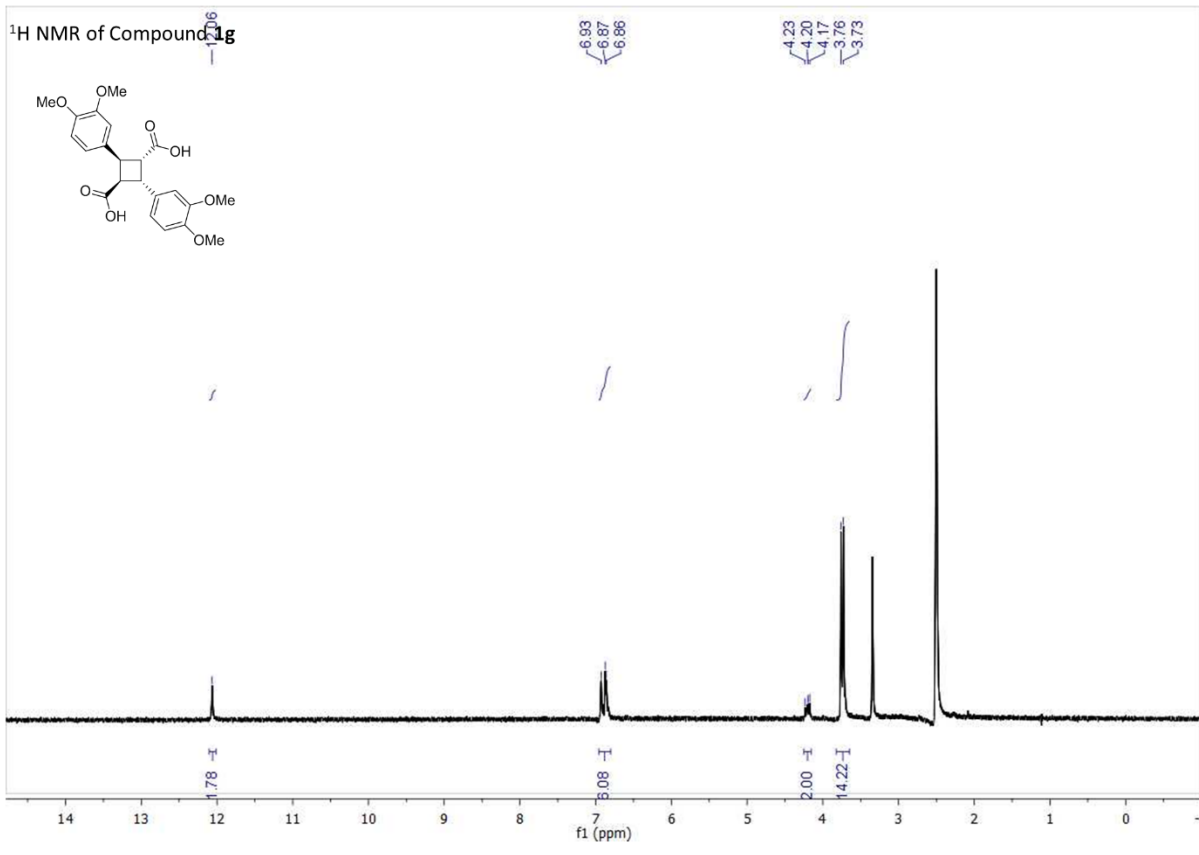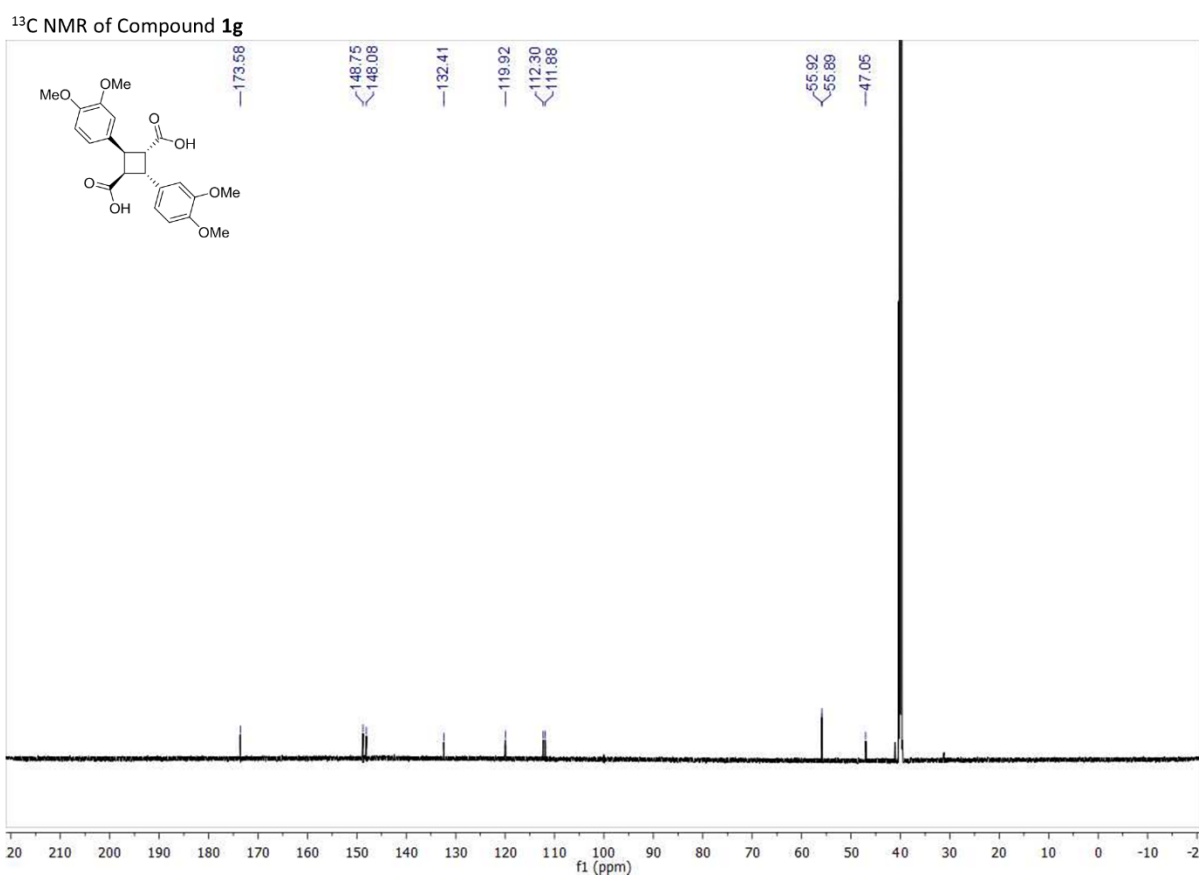

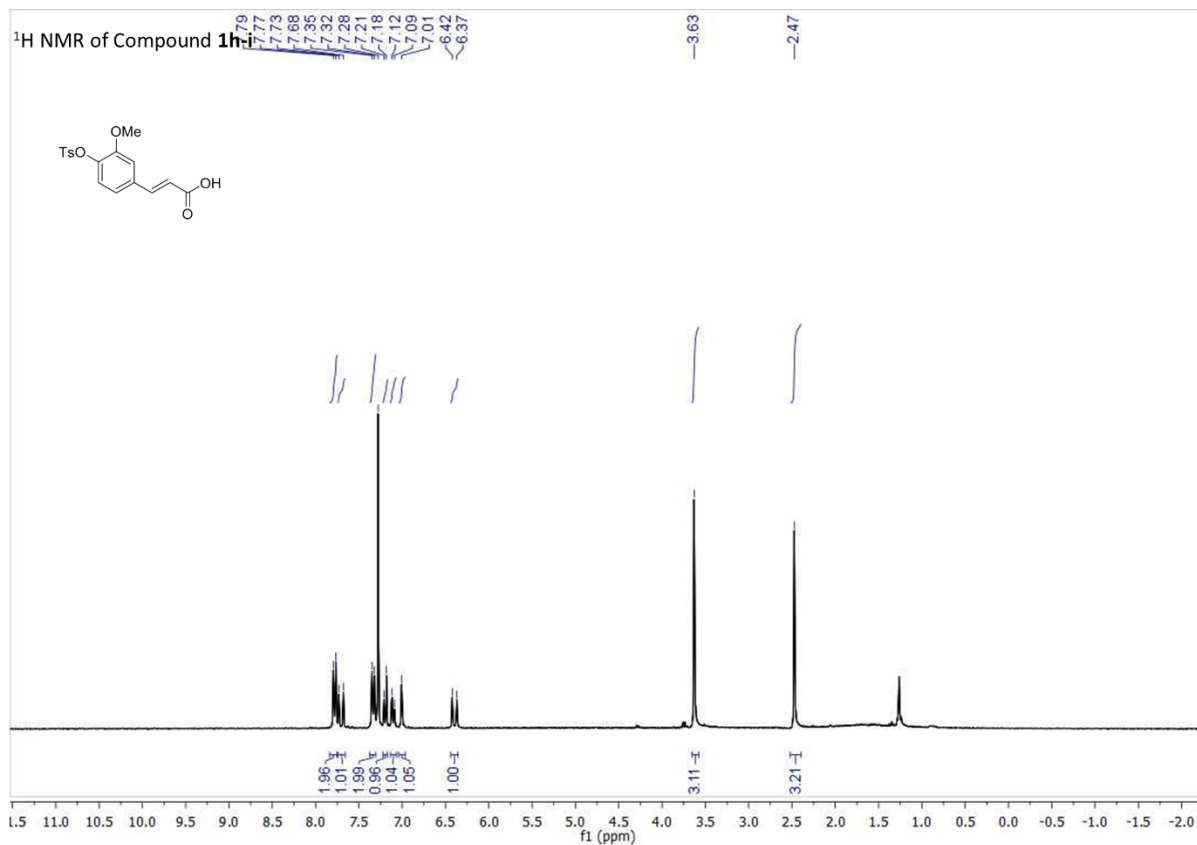



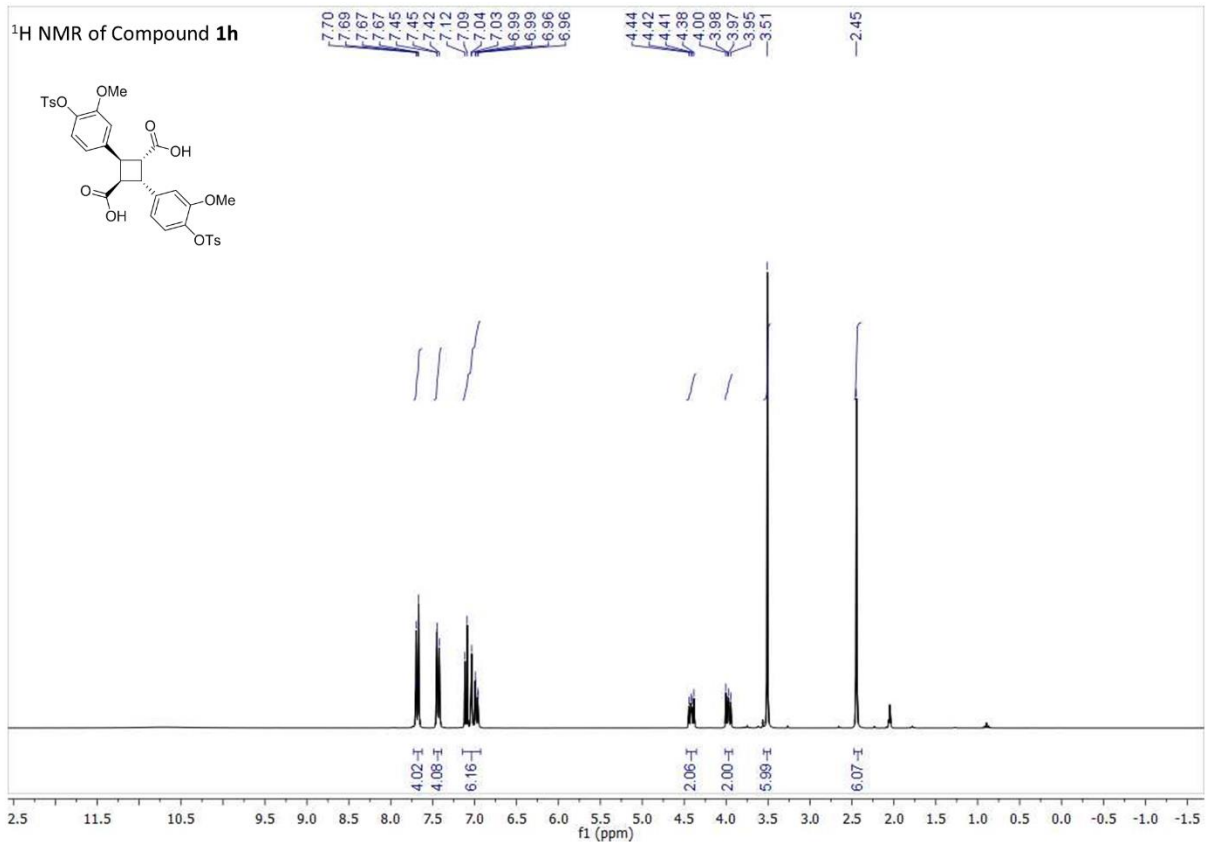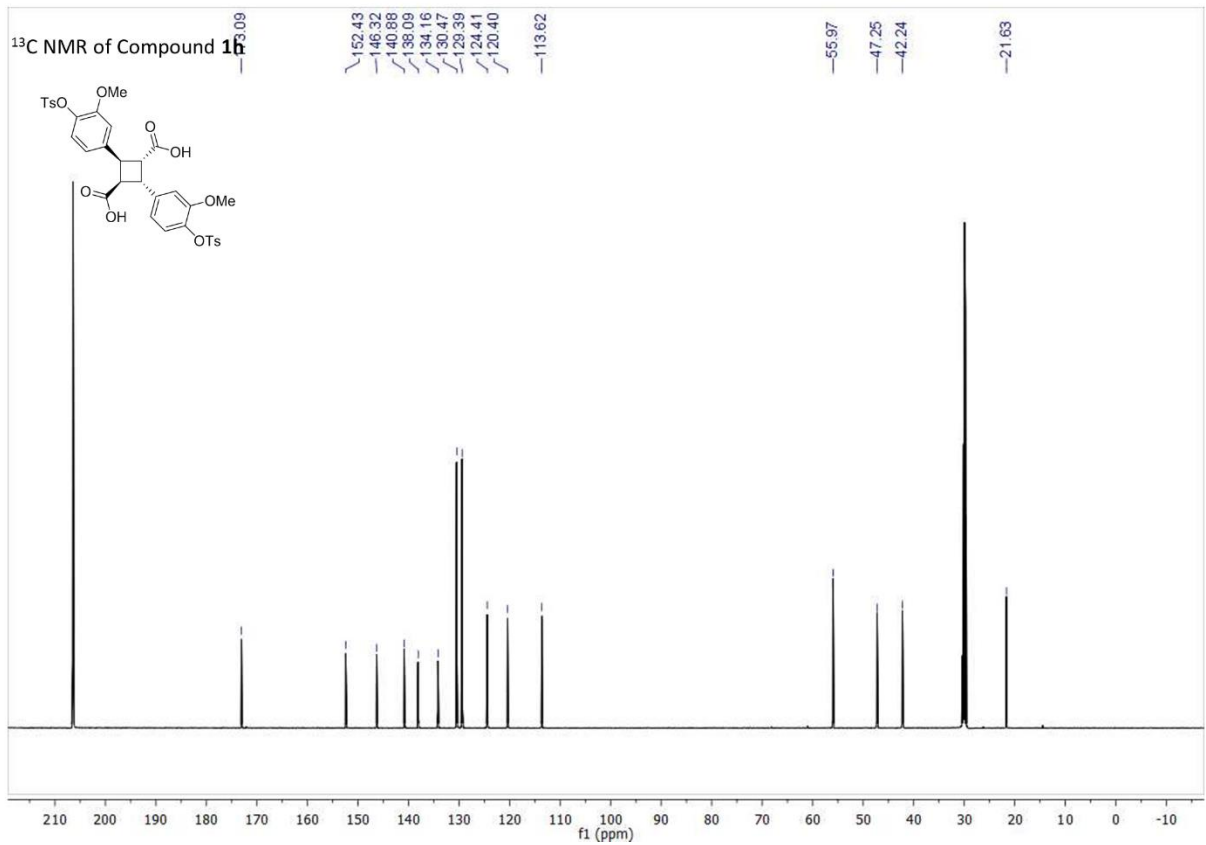

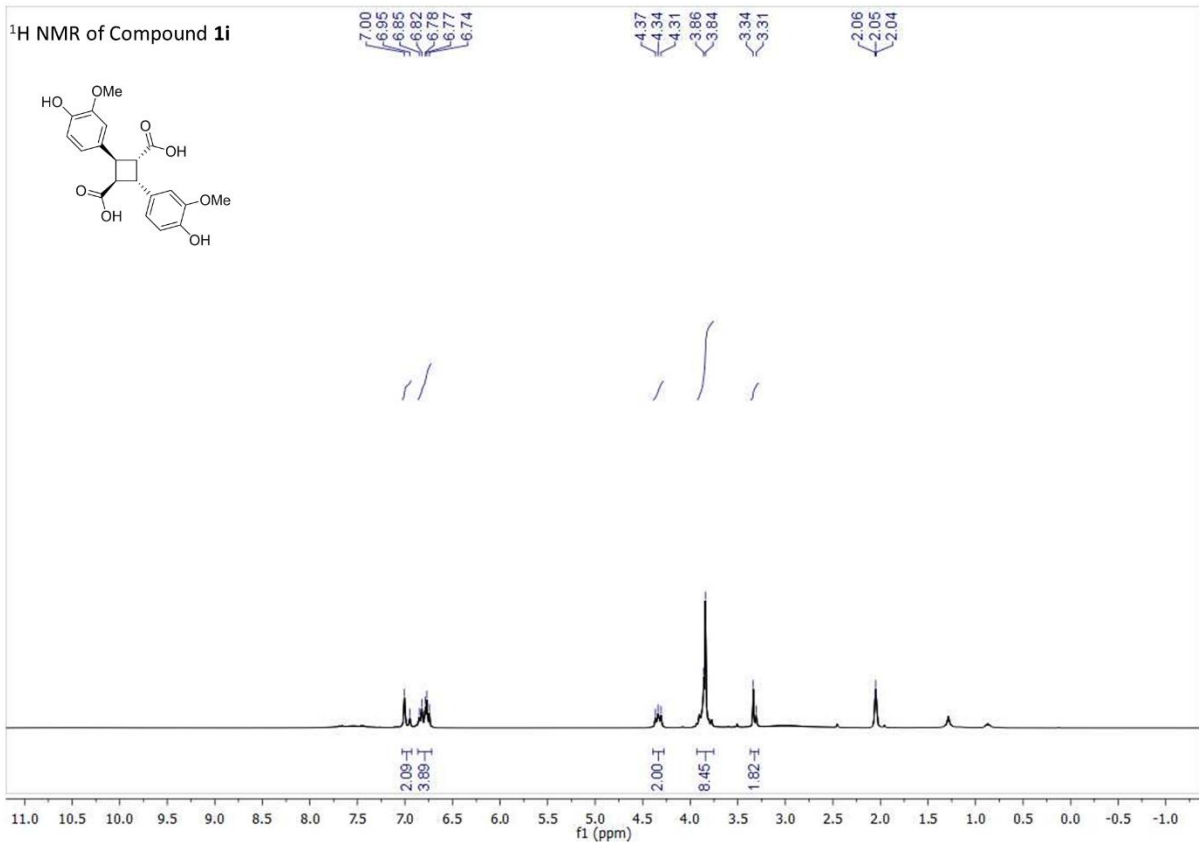

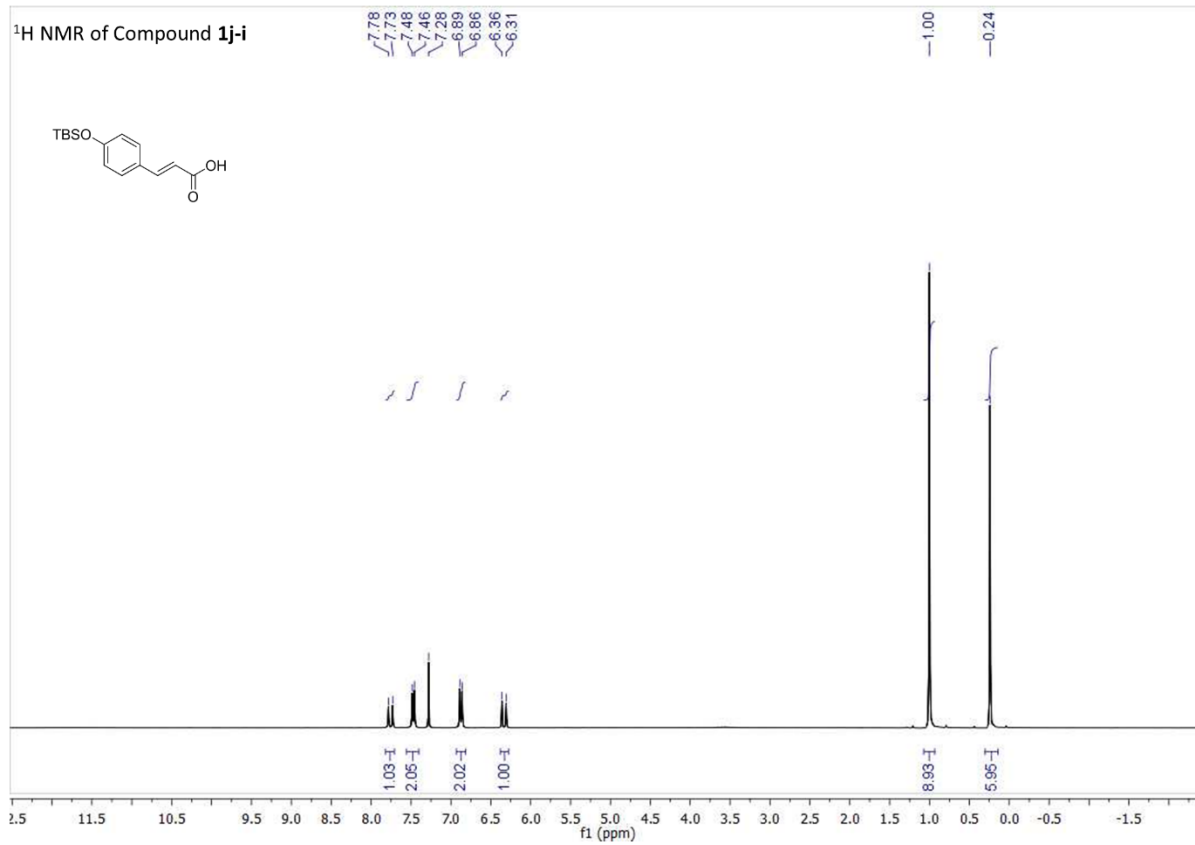

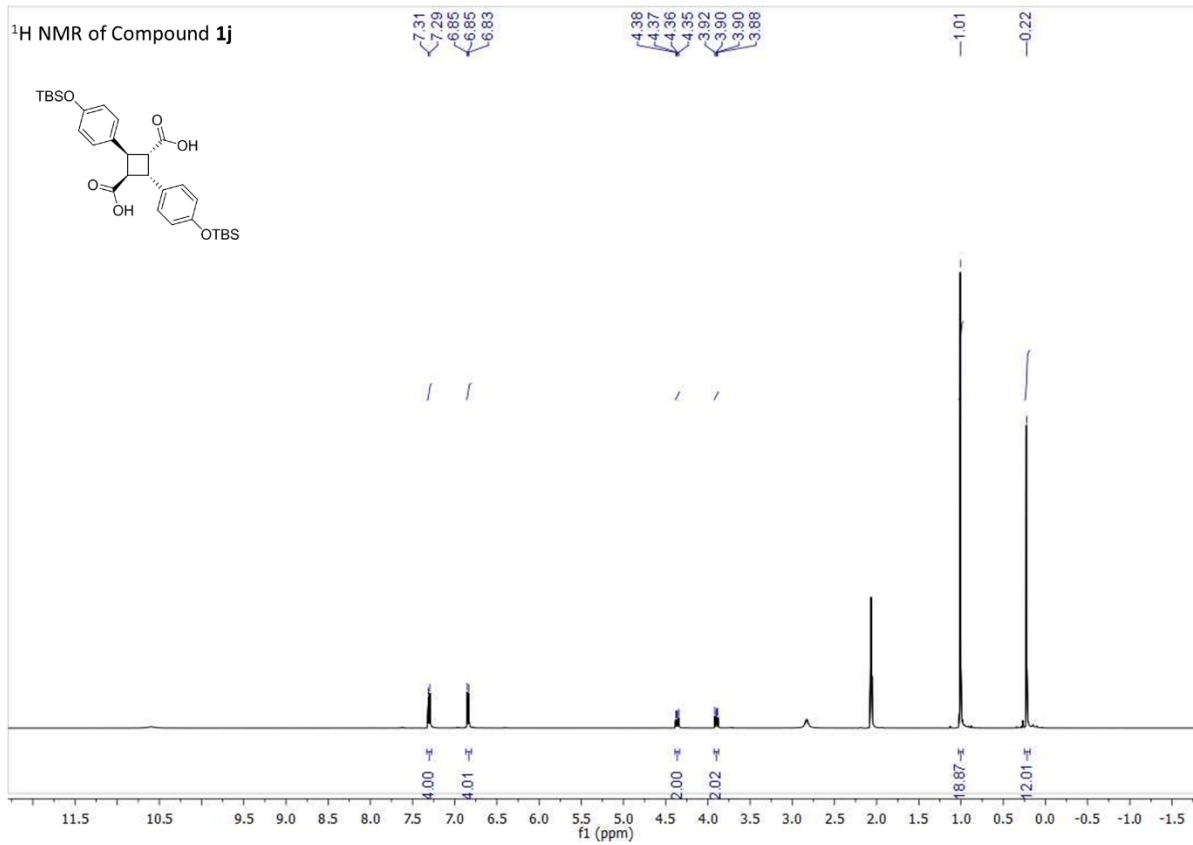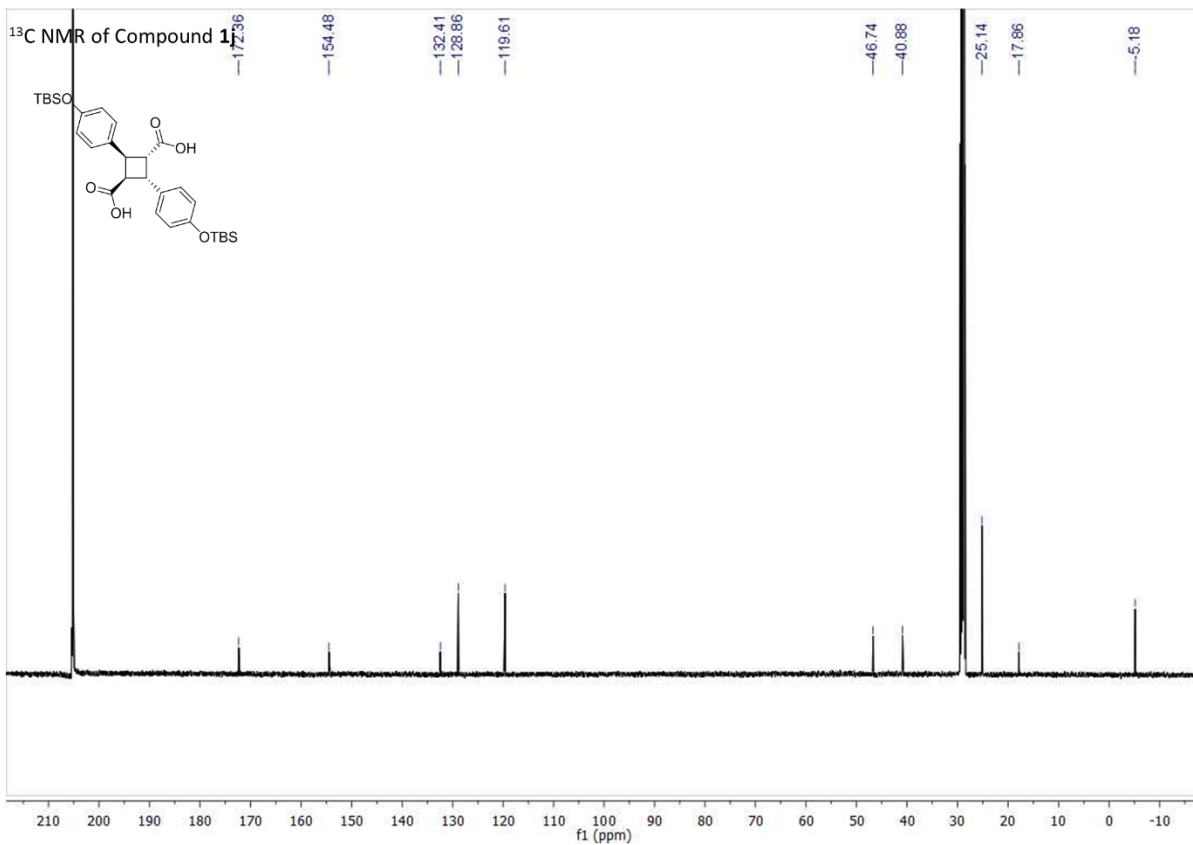

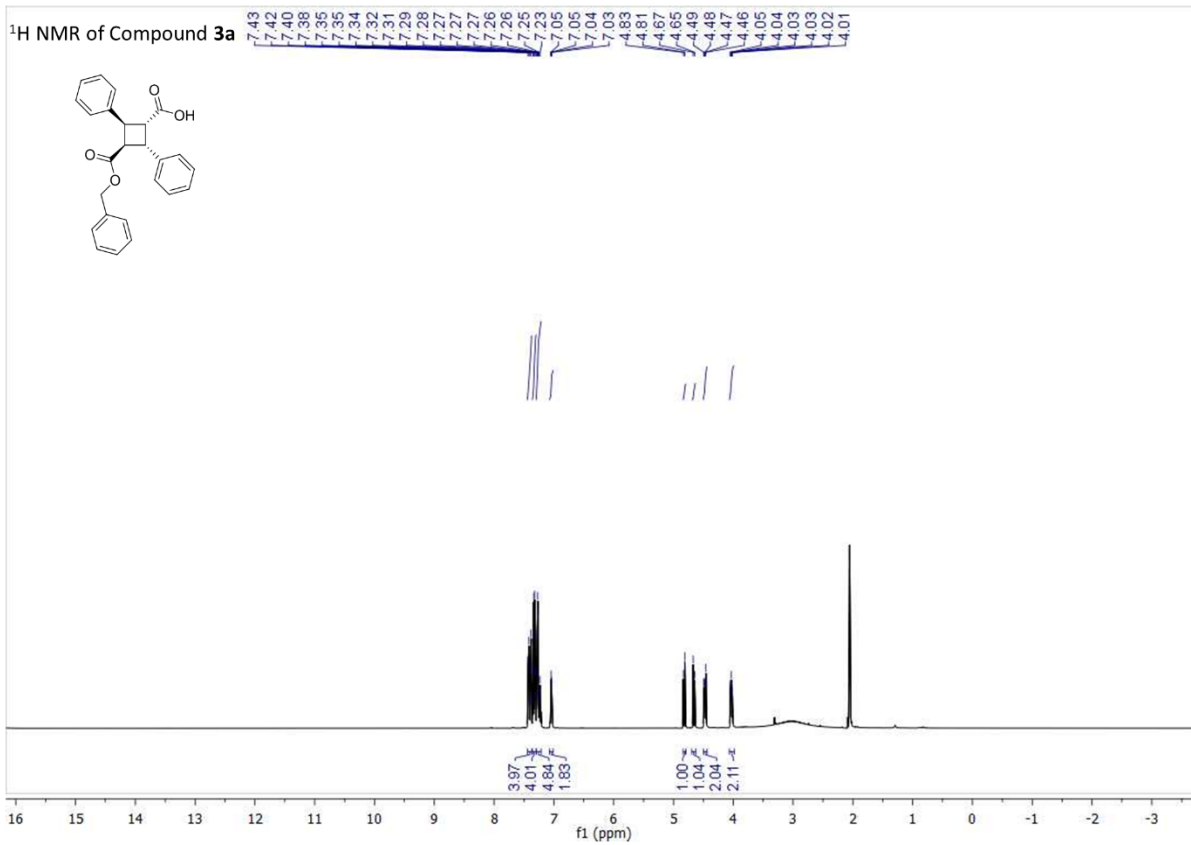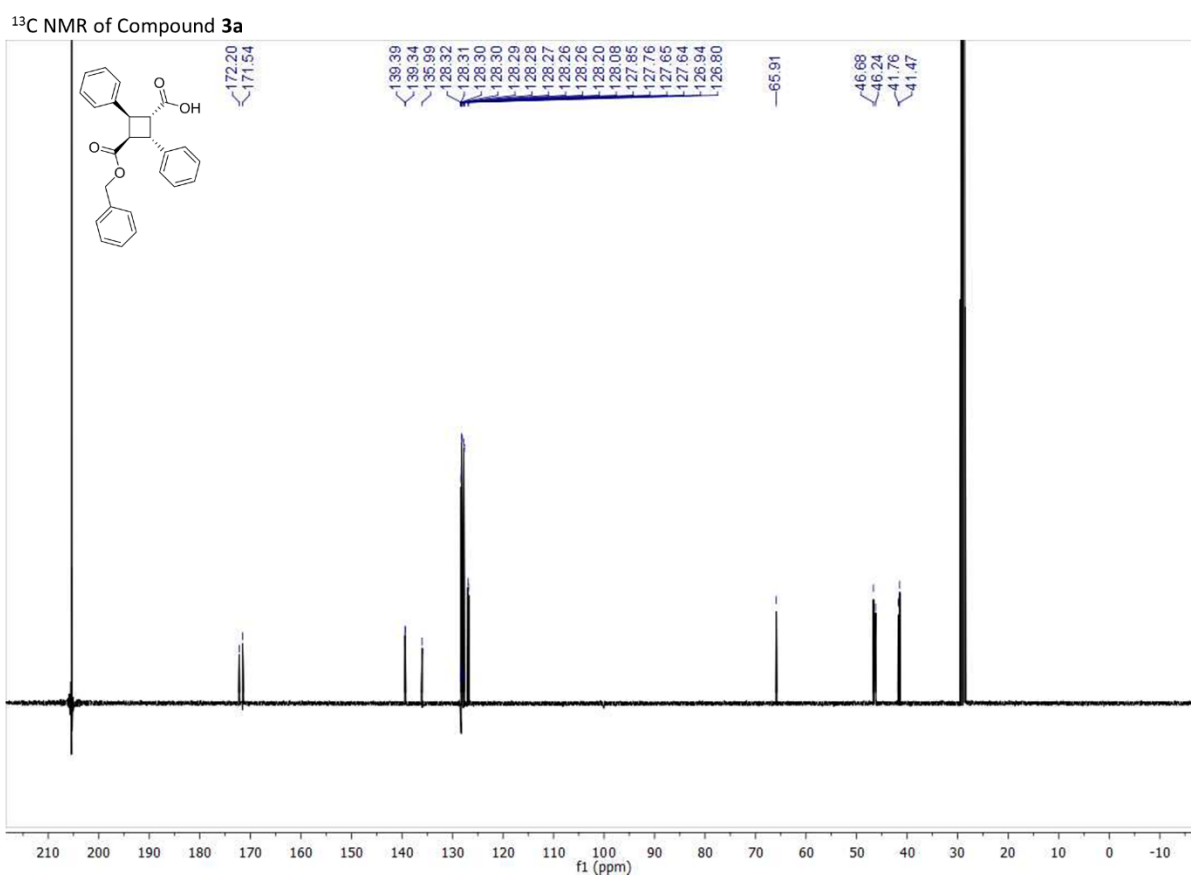

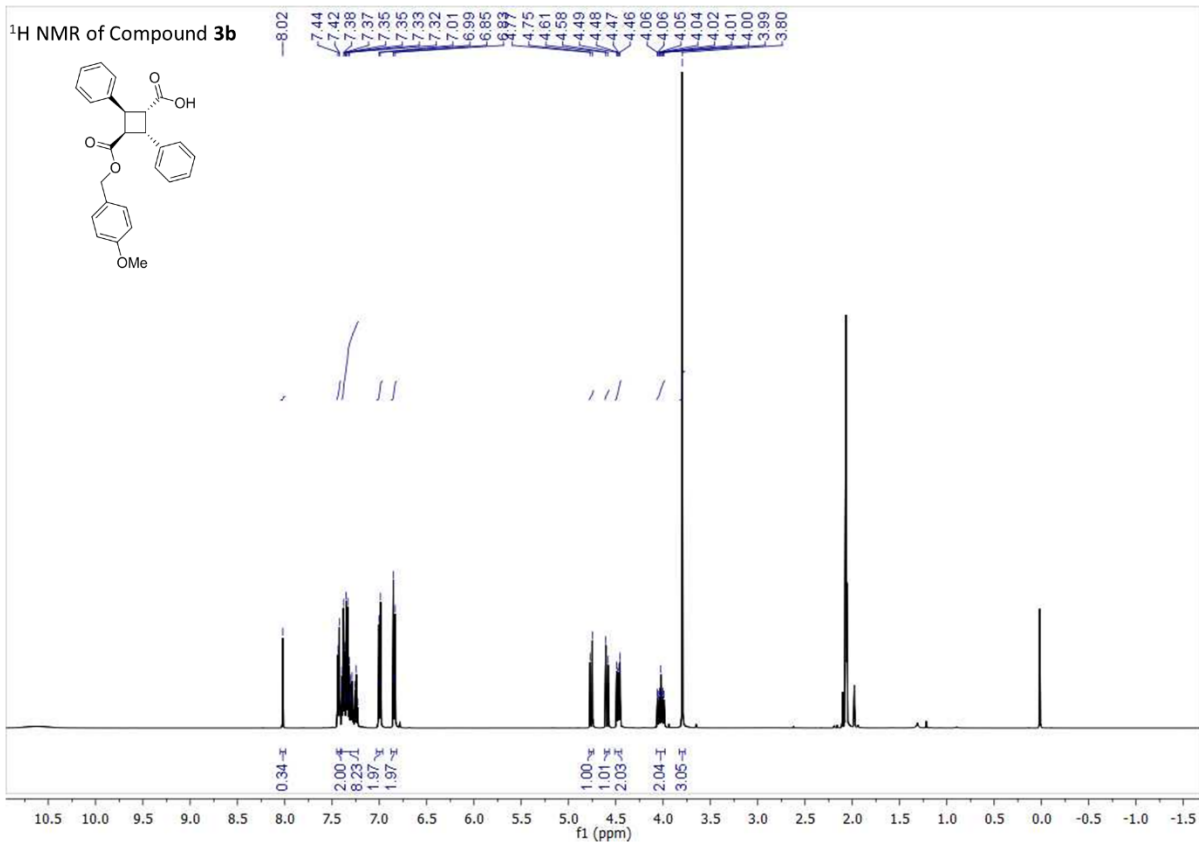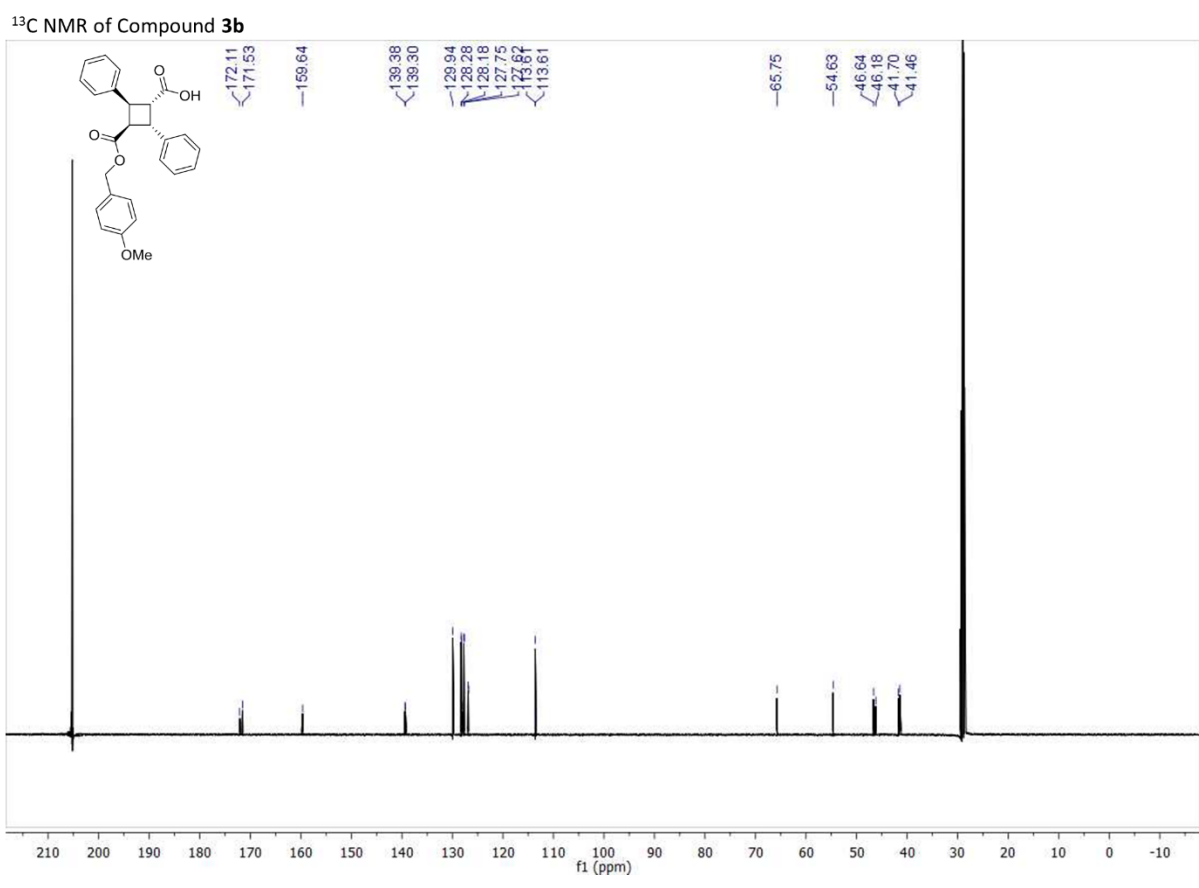

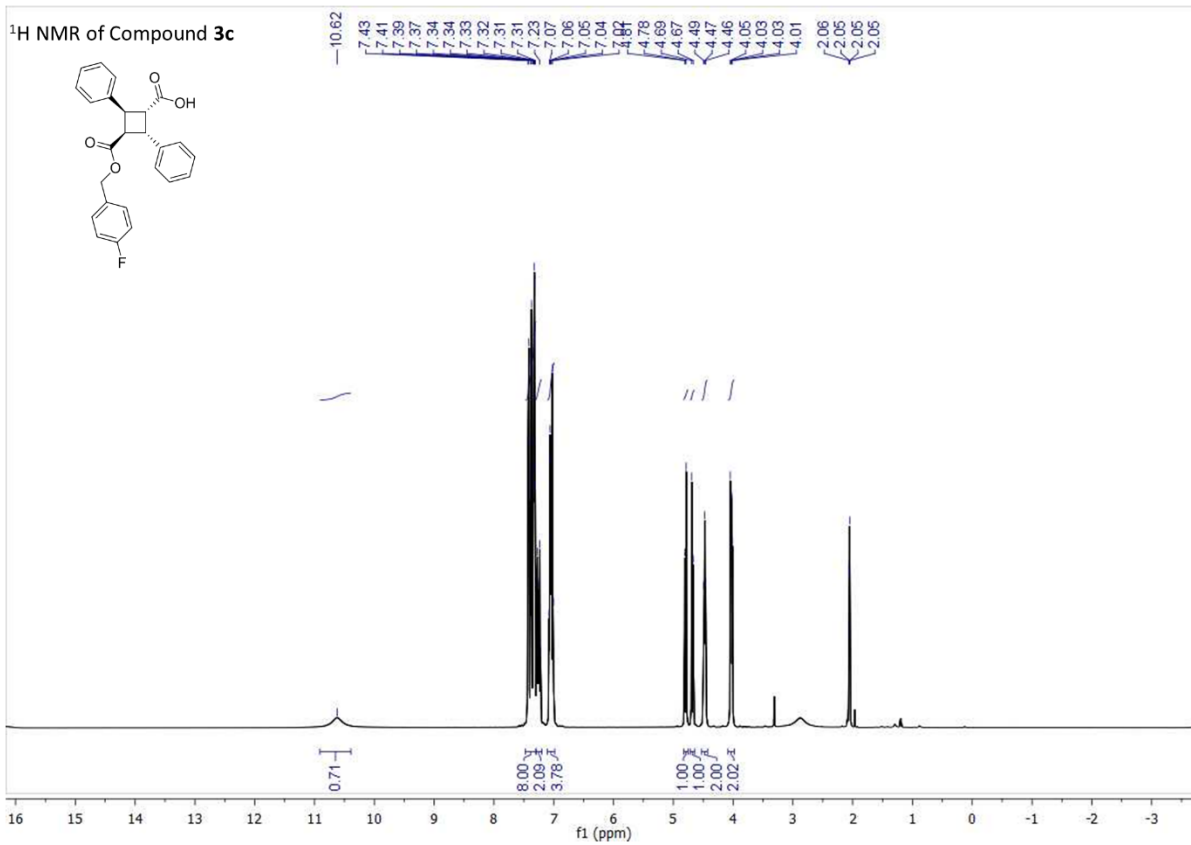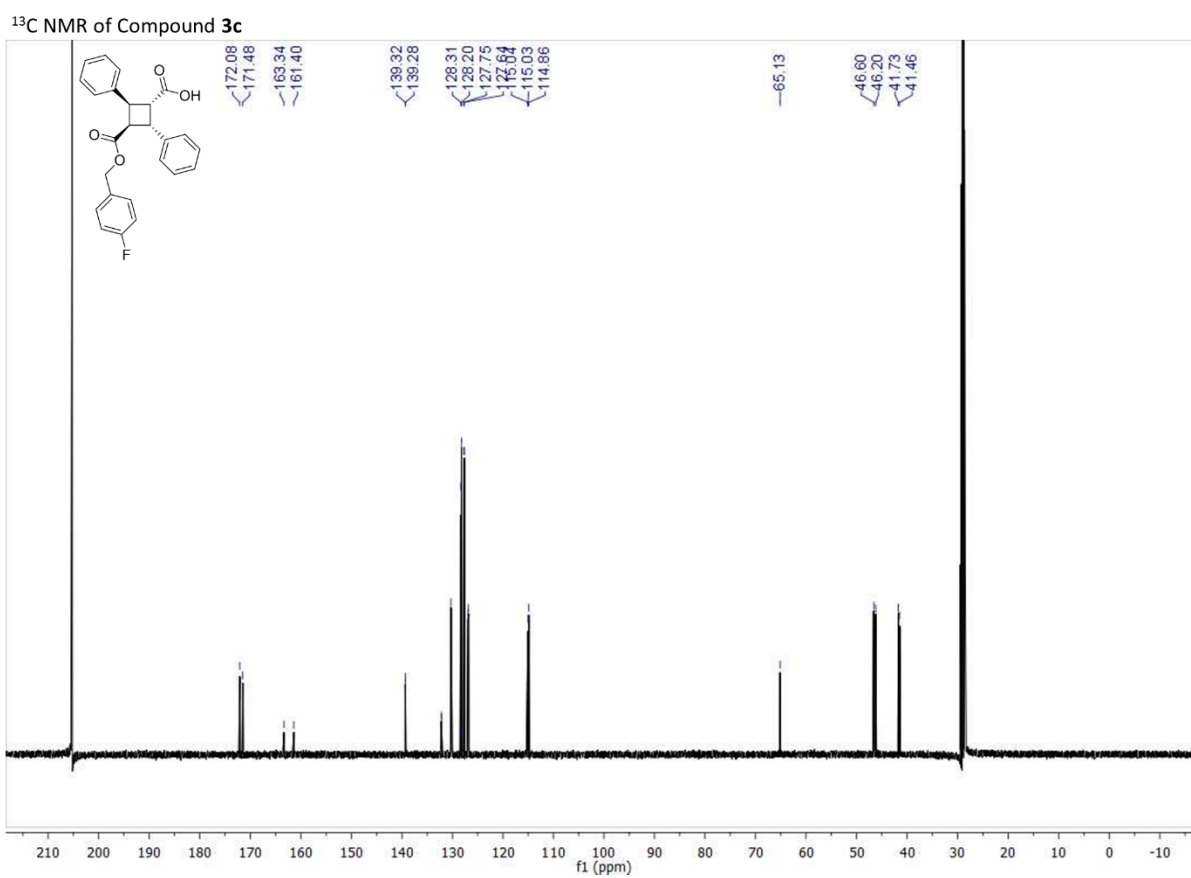

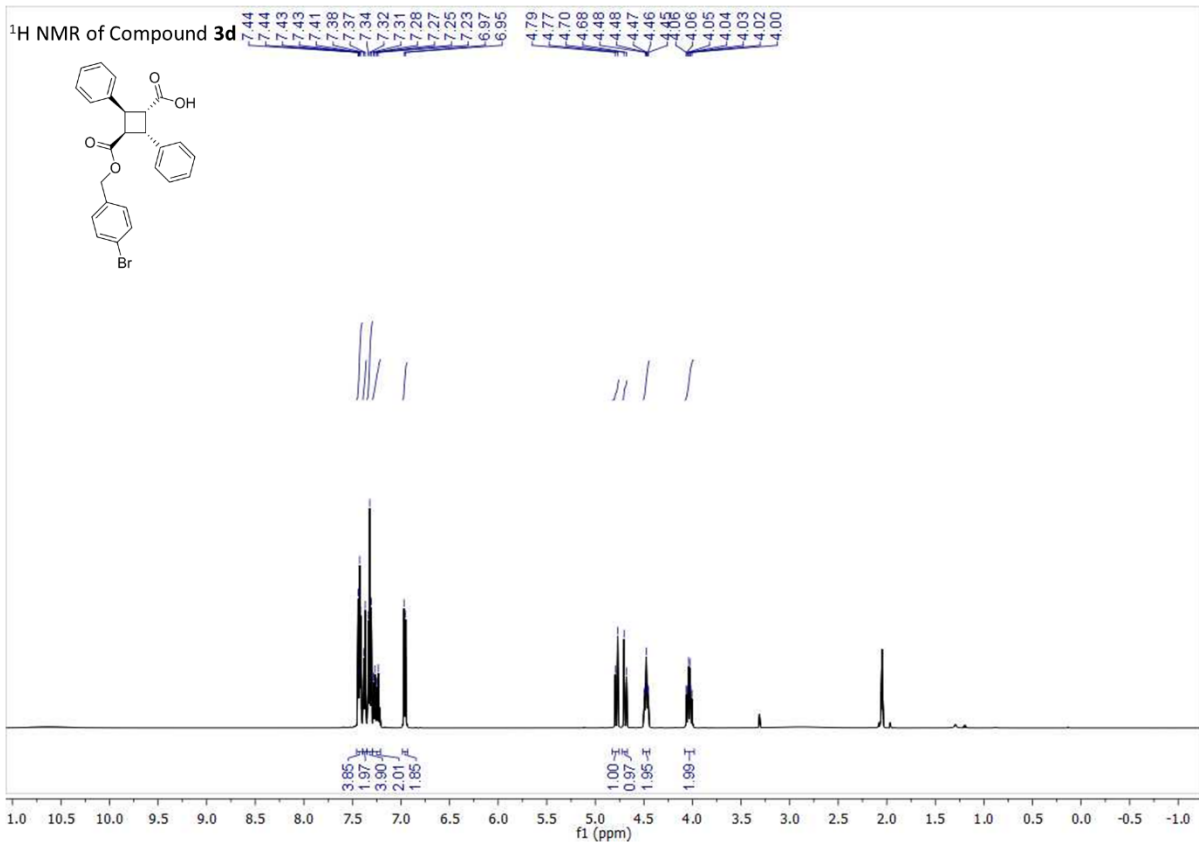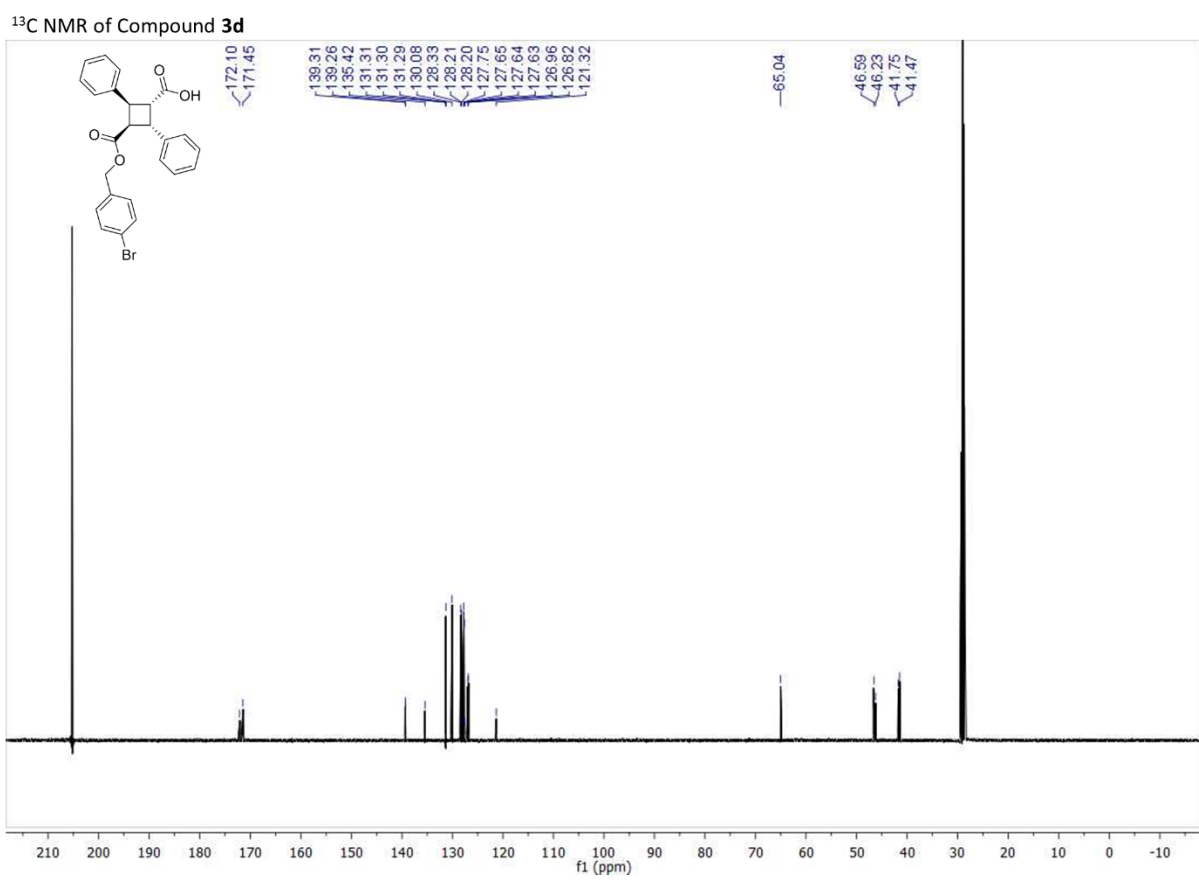



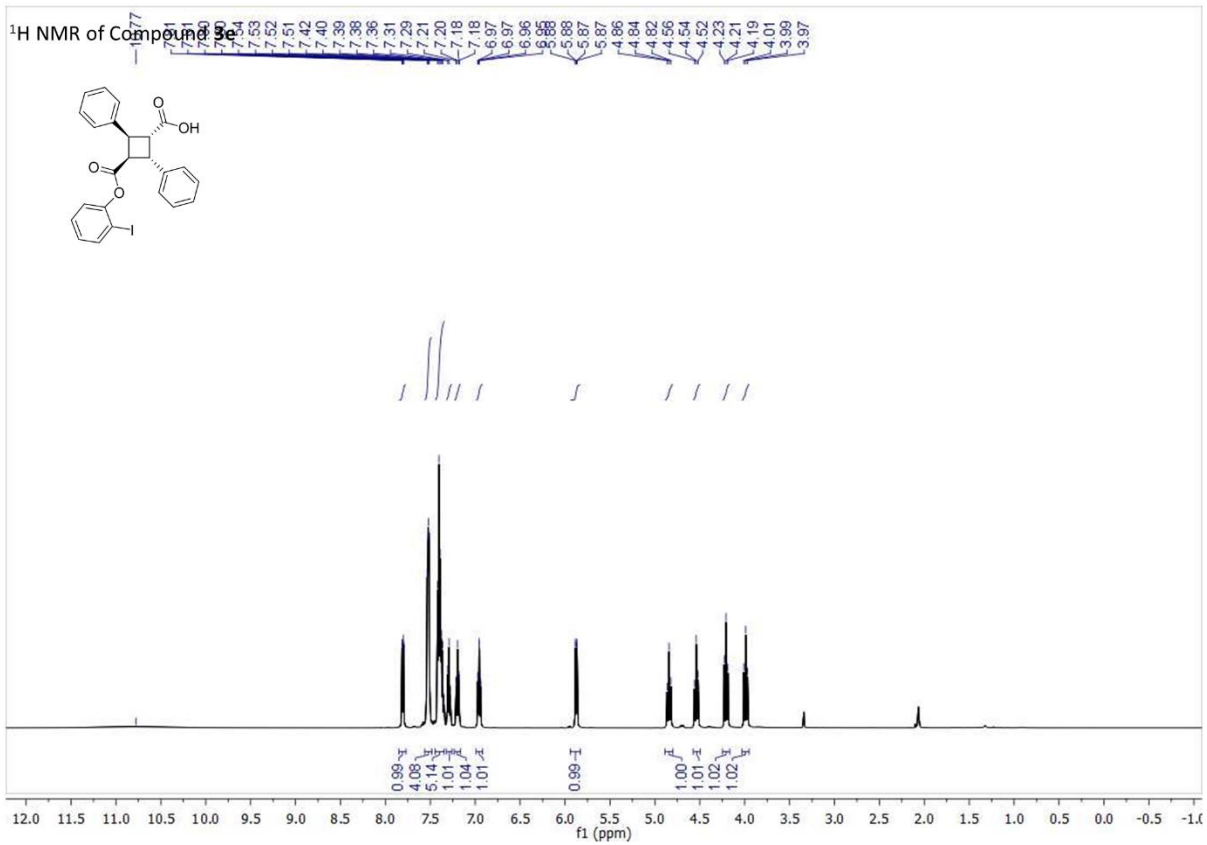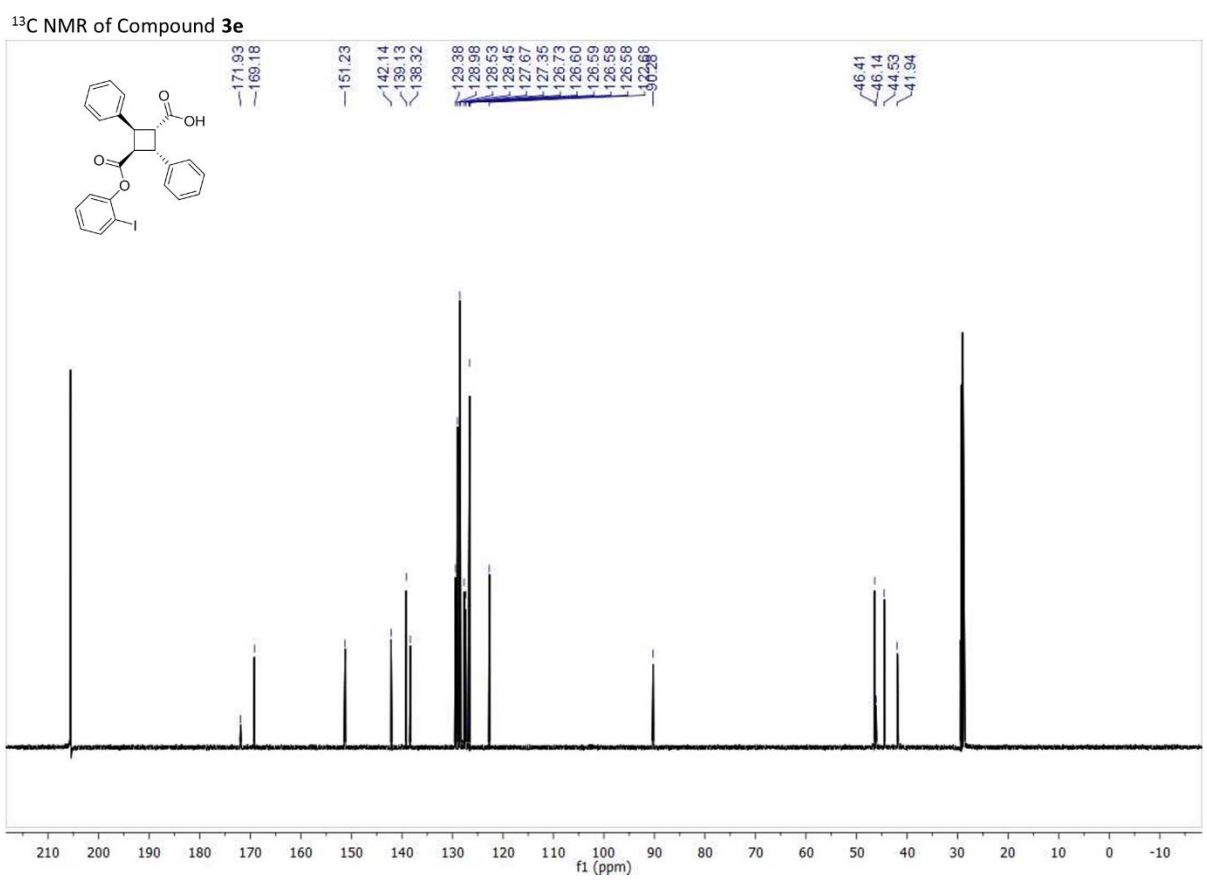

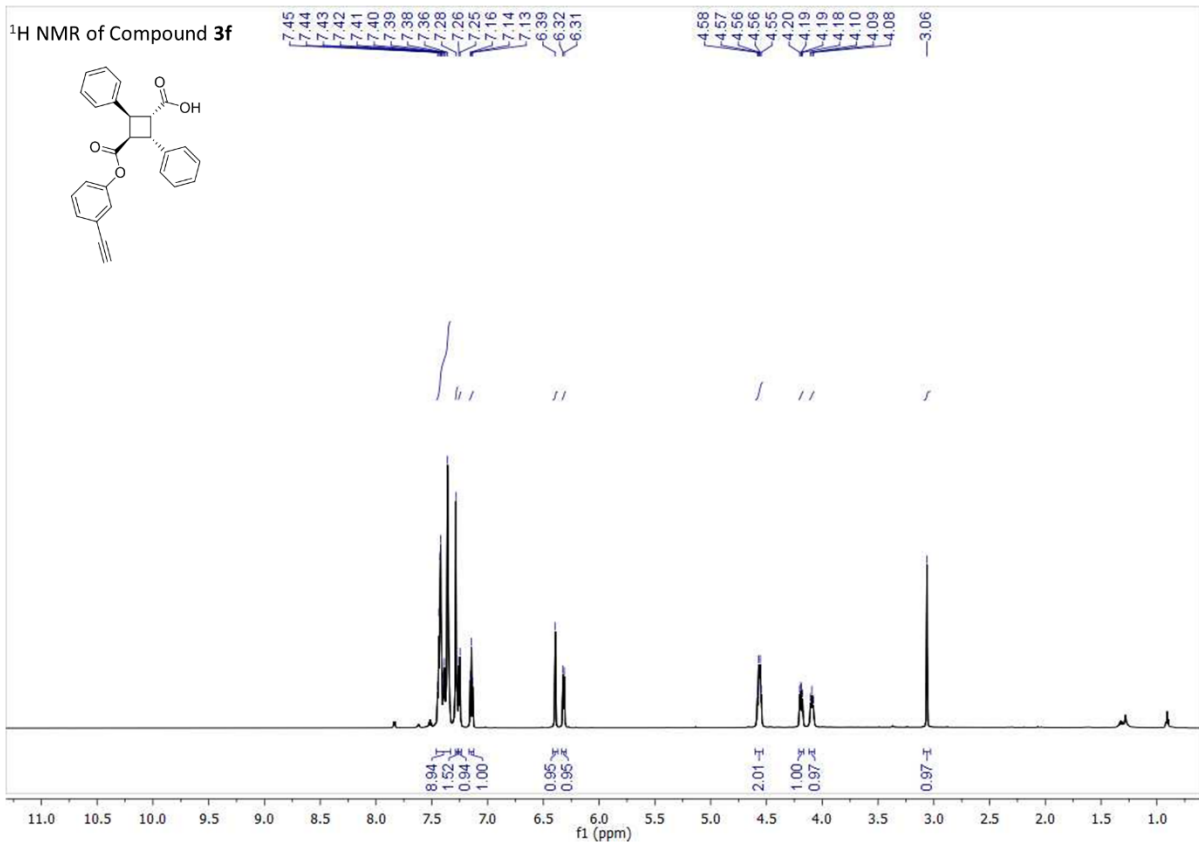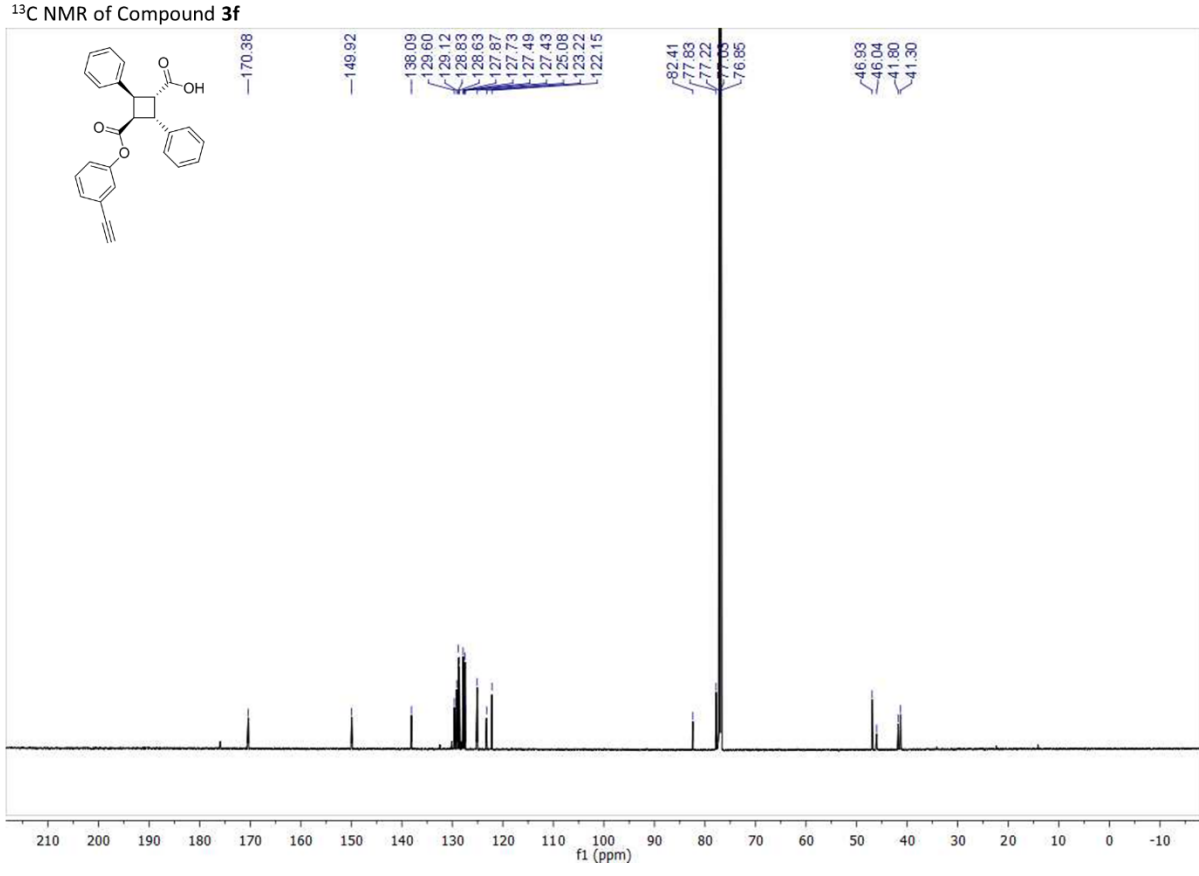



<sup>1</sup>H NMR of Compound 3h

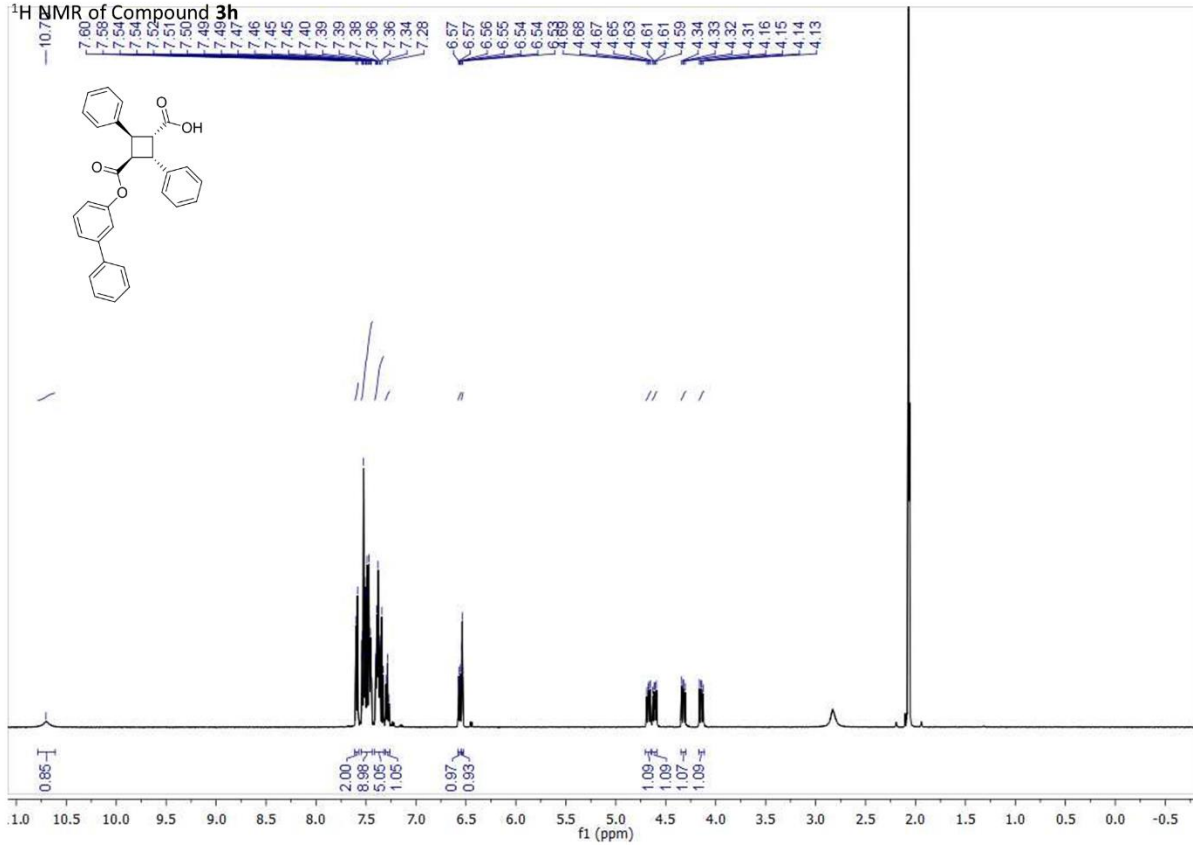

<sup>13</sup>C NMR of Compound 3h

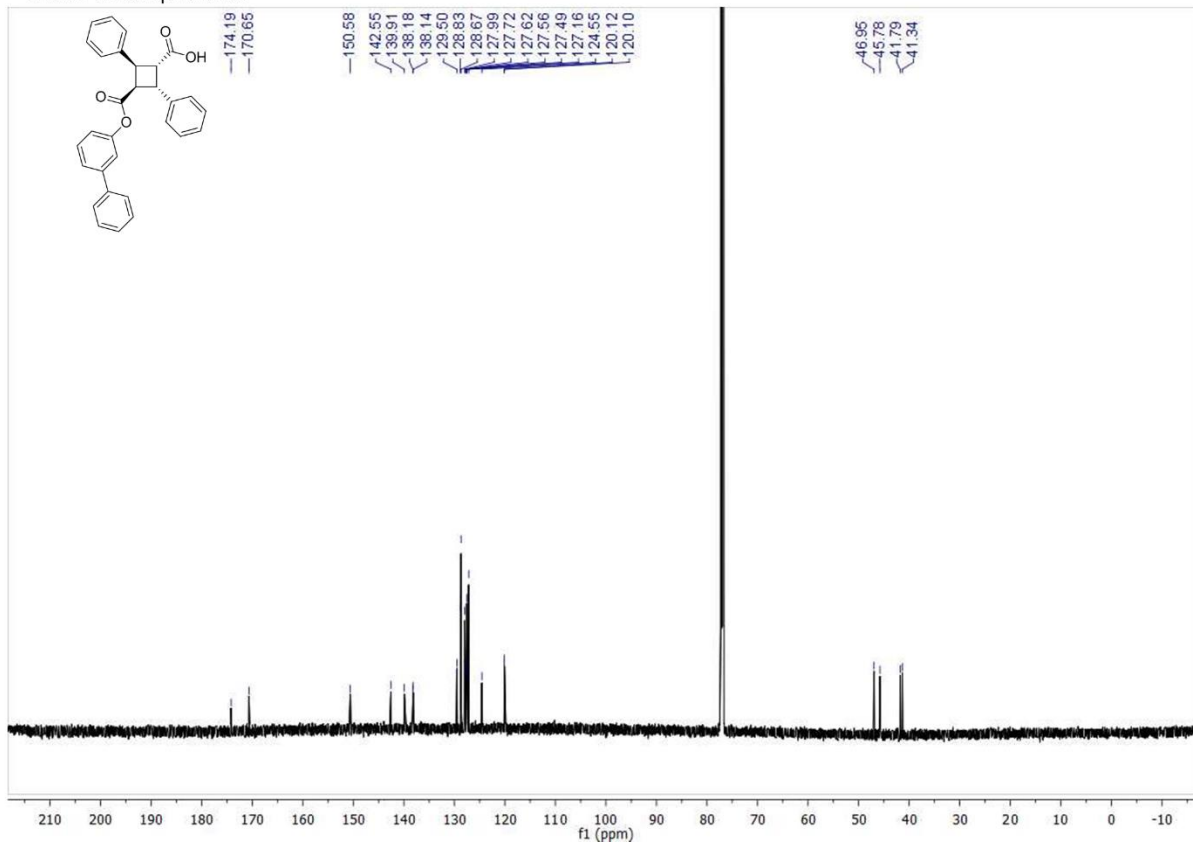

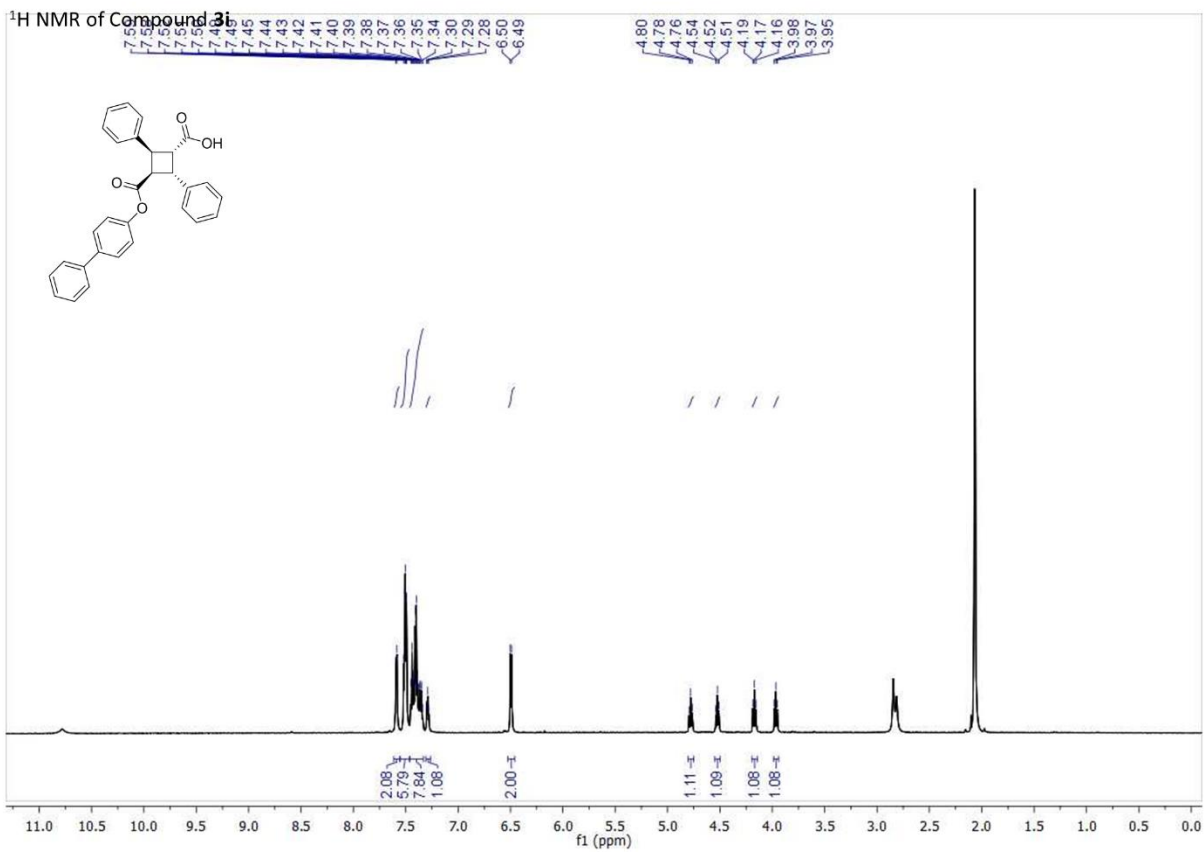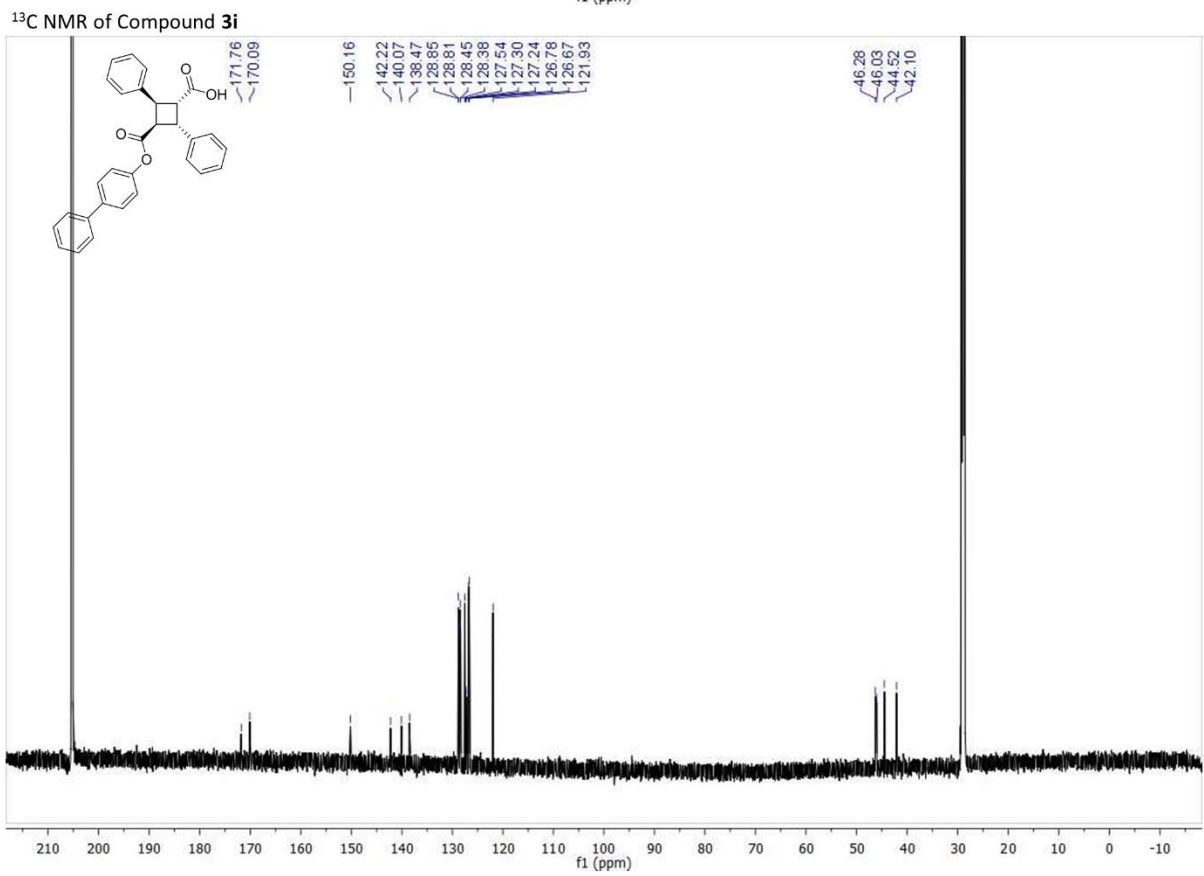

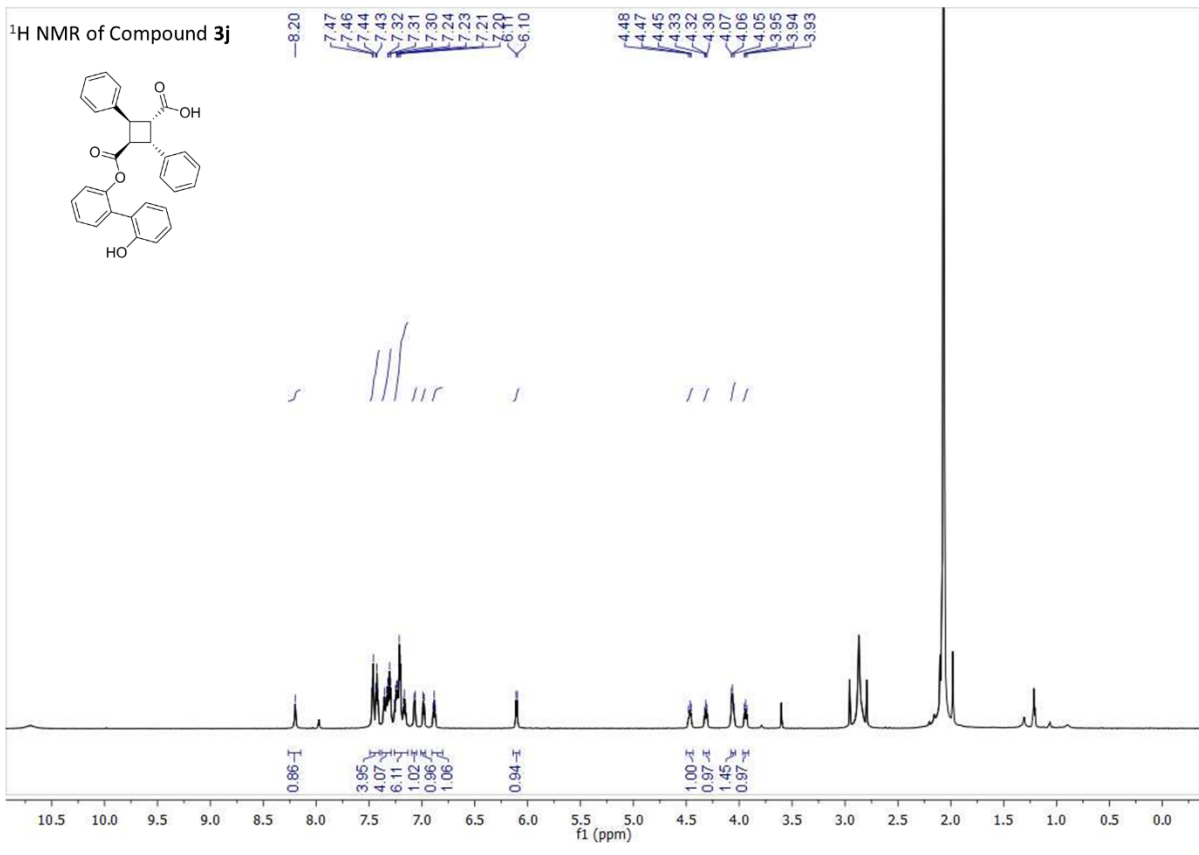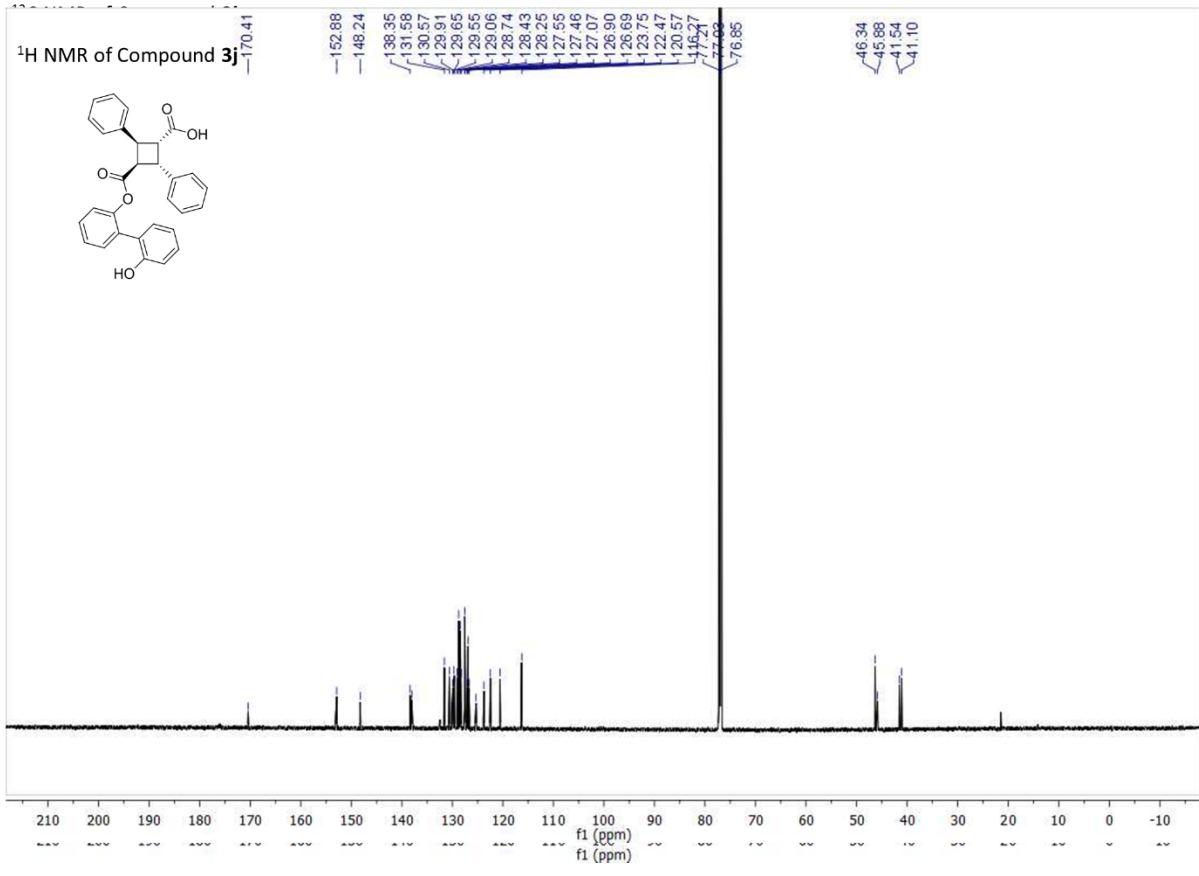

<sup>1</sup>H NMR of Compound 3k

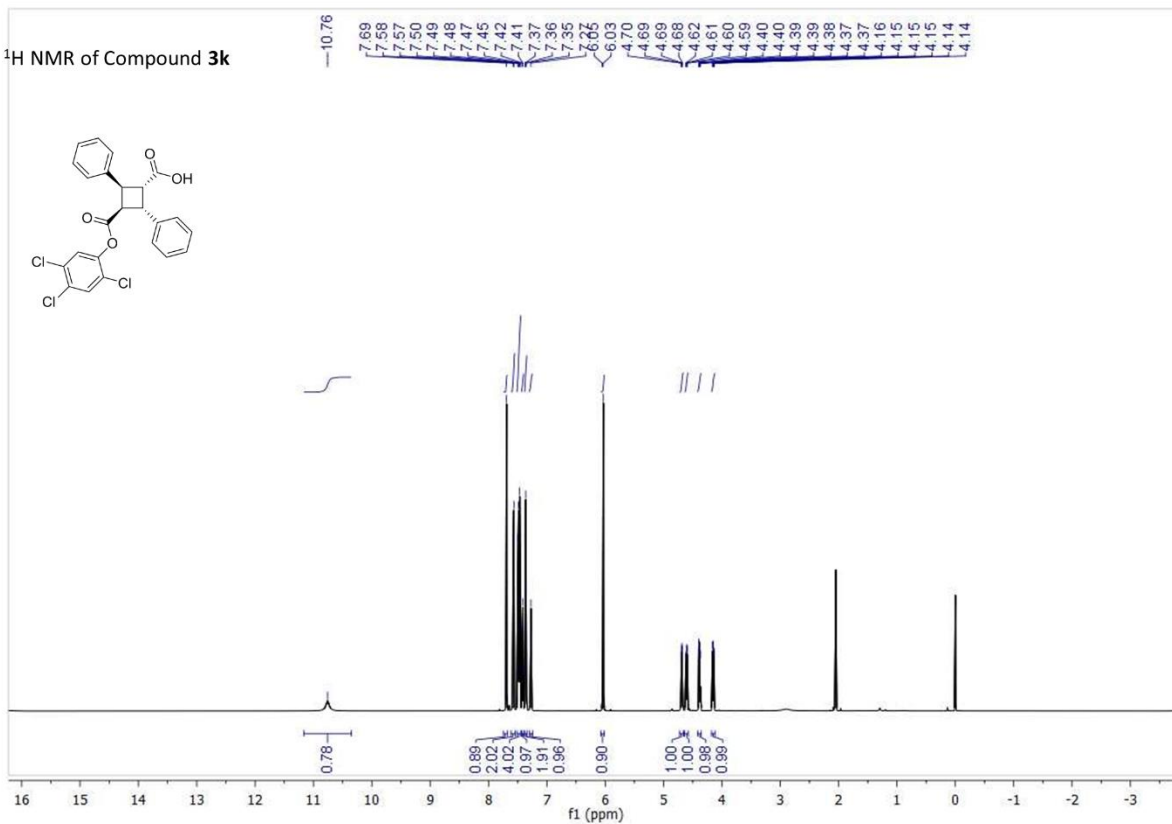

<sup>13</sup>C NMR of Compound 3k

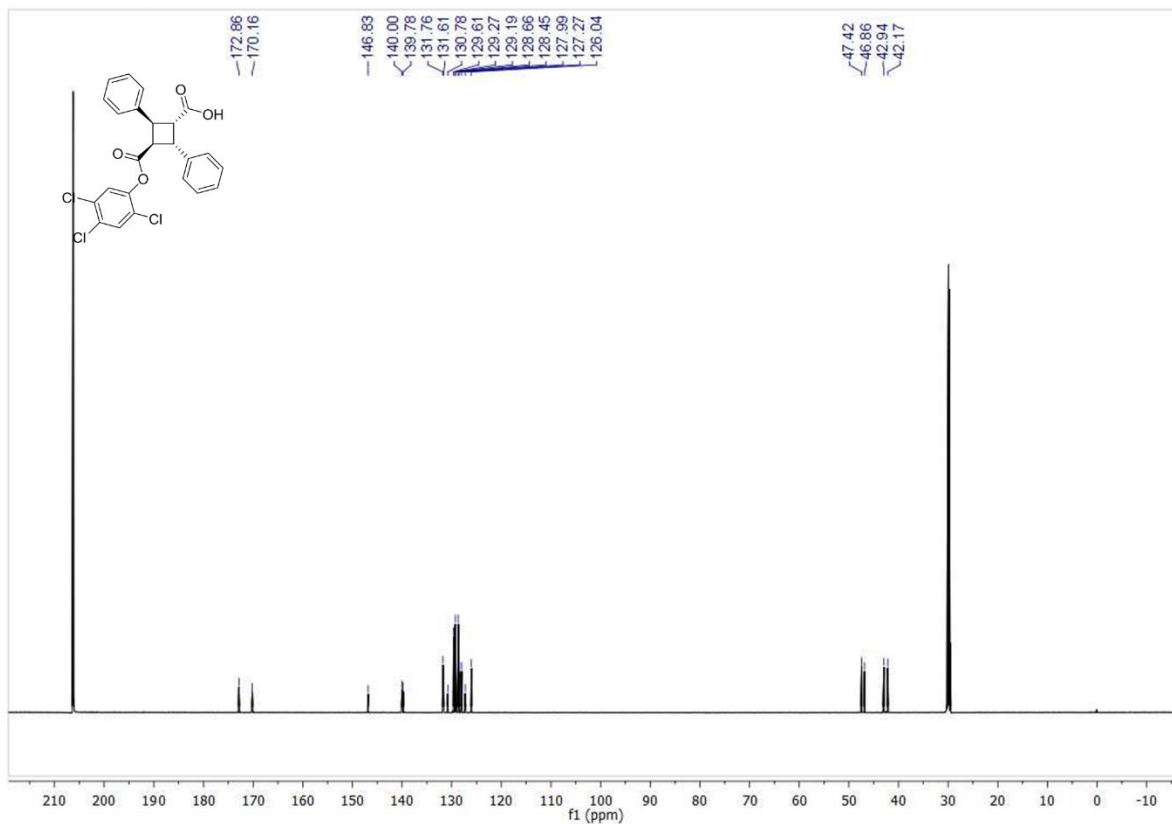

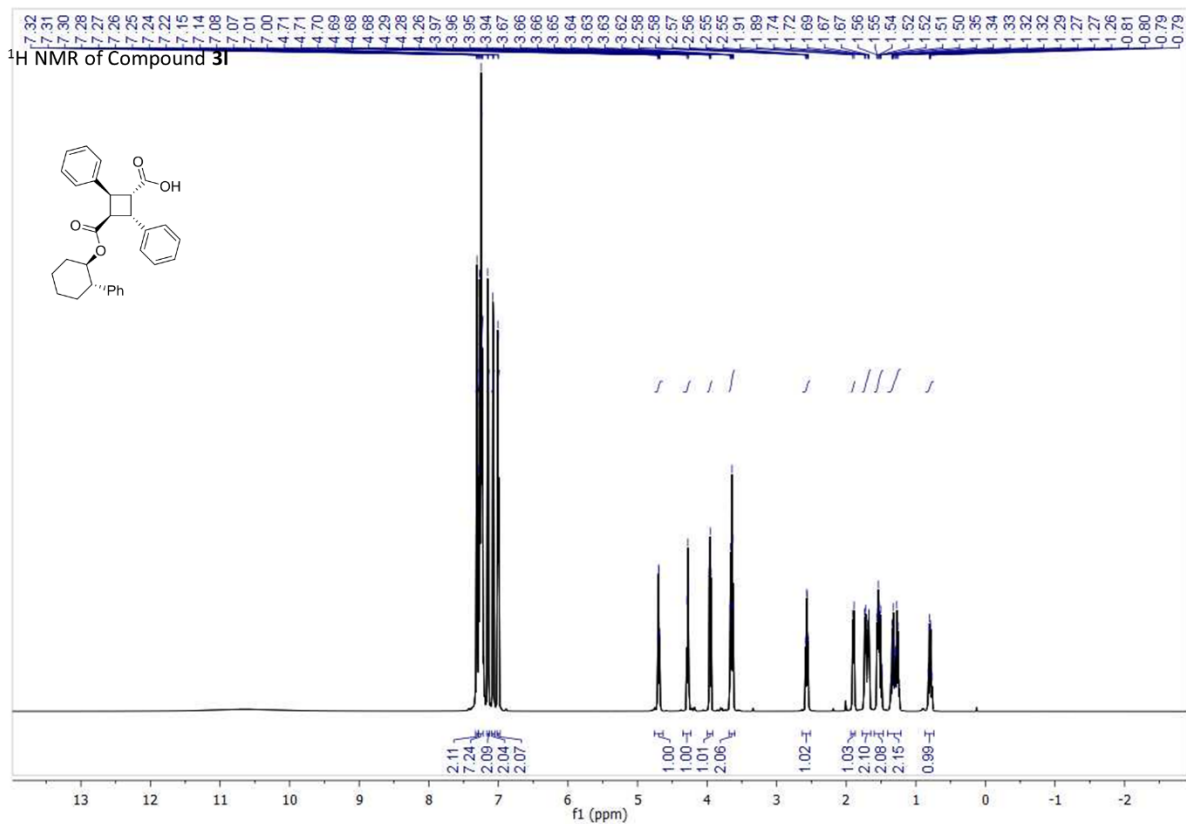

<sup>13</sup>C NMR of Compound 3I

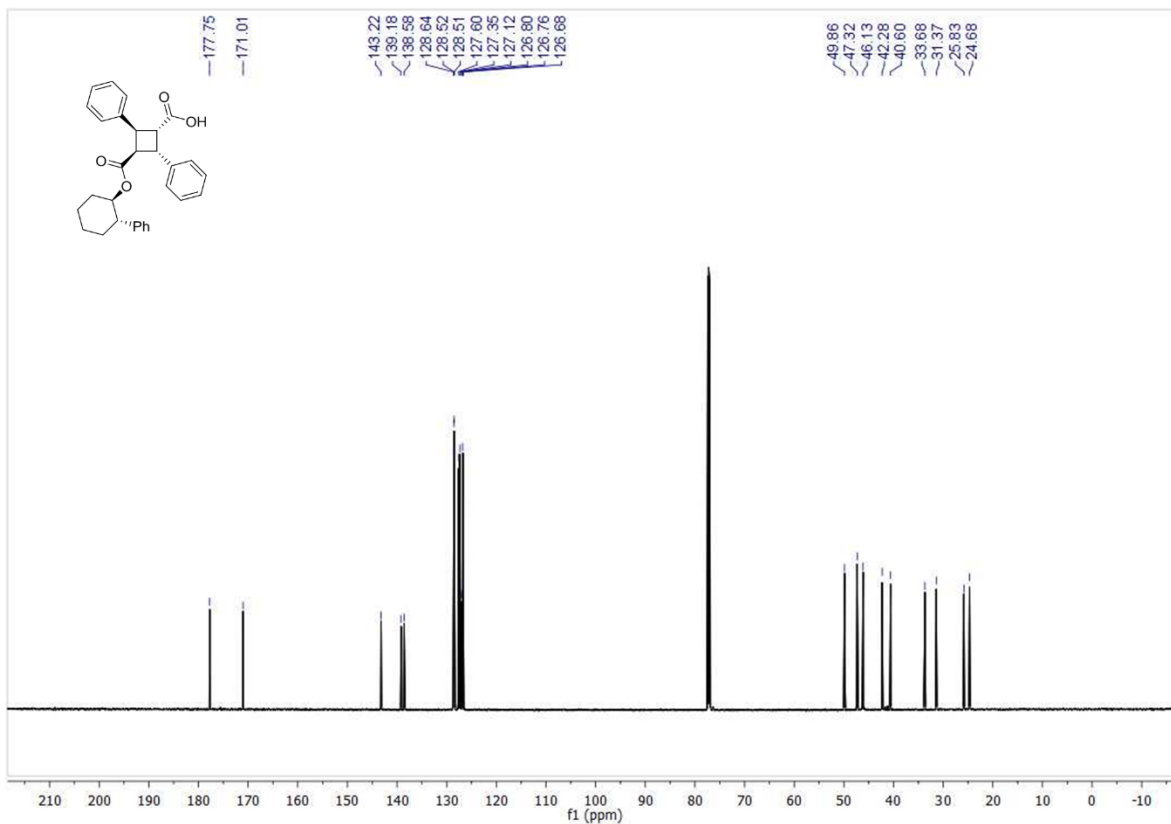



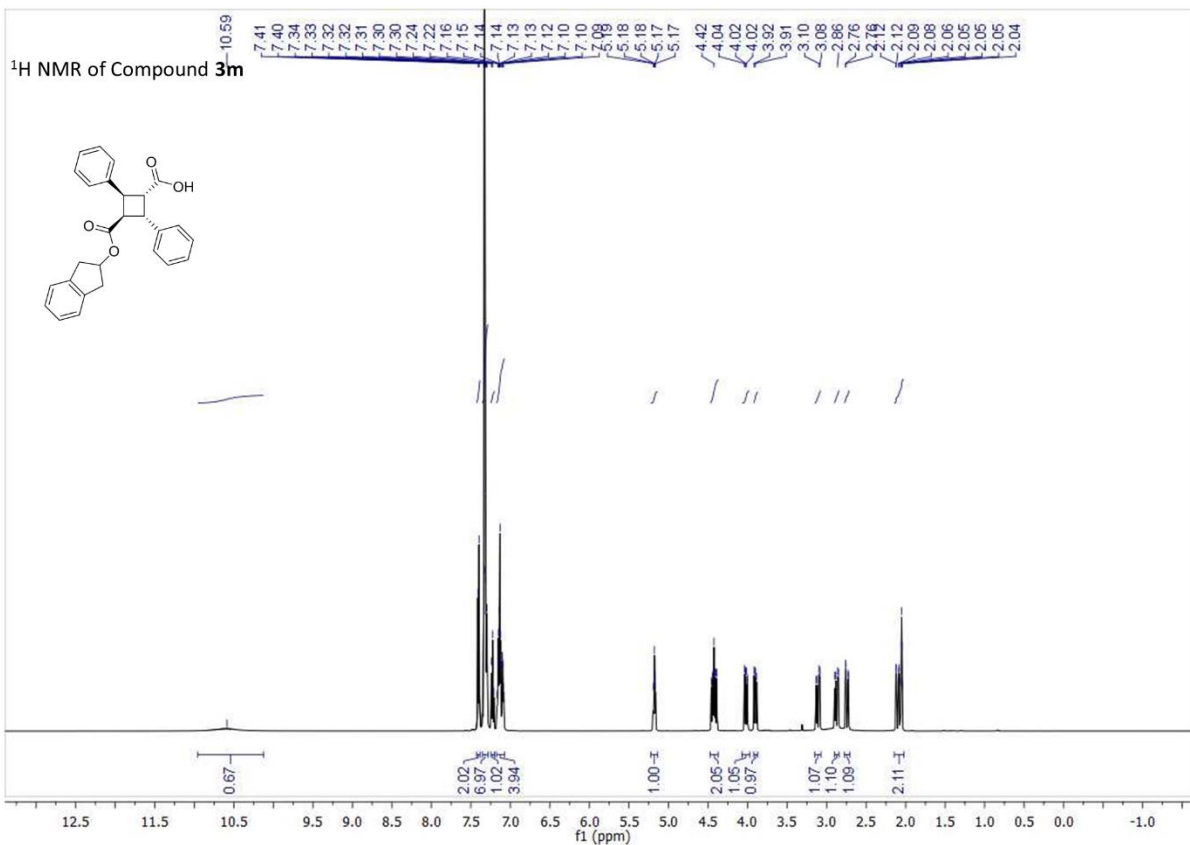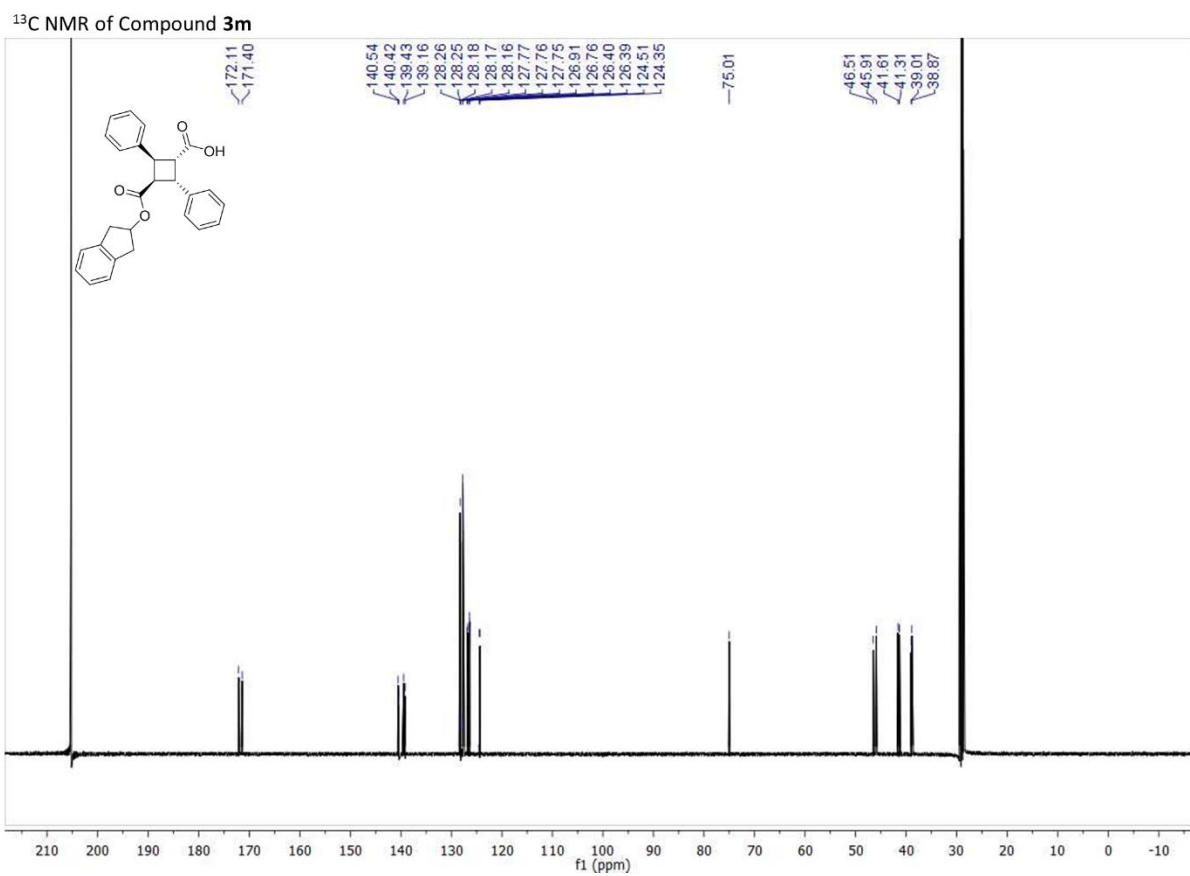

<sup>1</sup>H NMR of Compound 3n

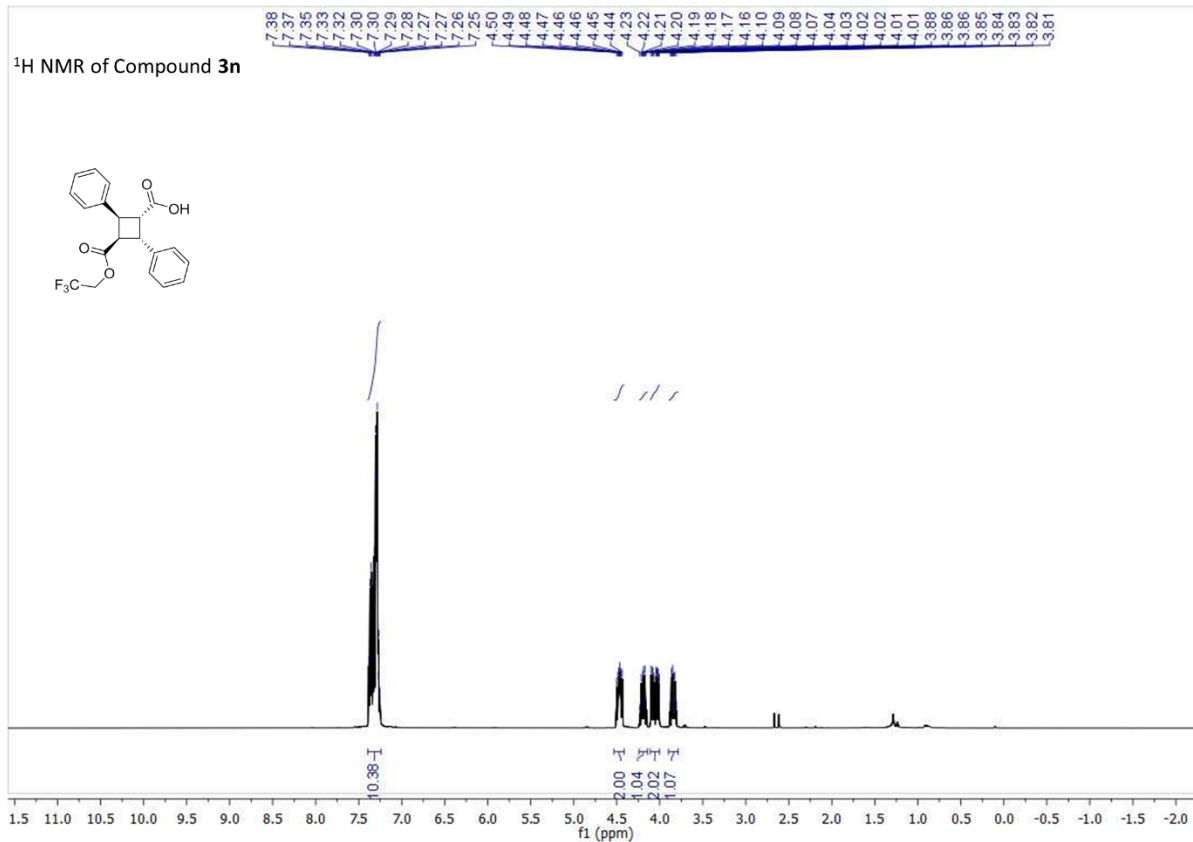

<sup>13</sup>C NMR of Compound 3n

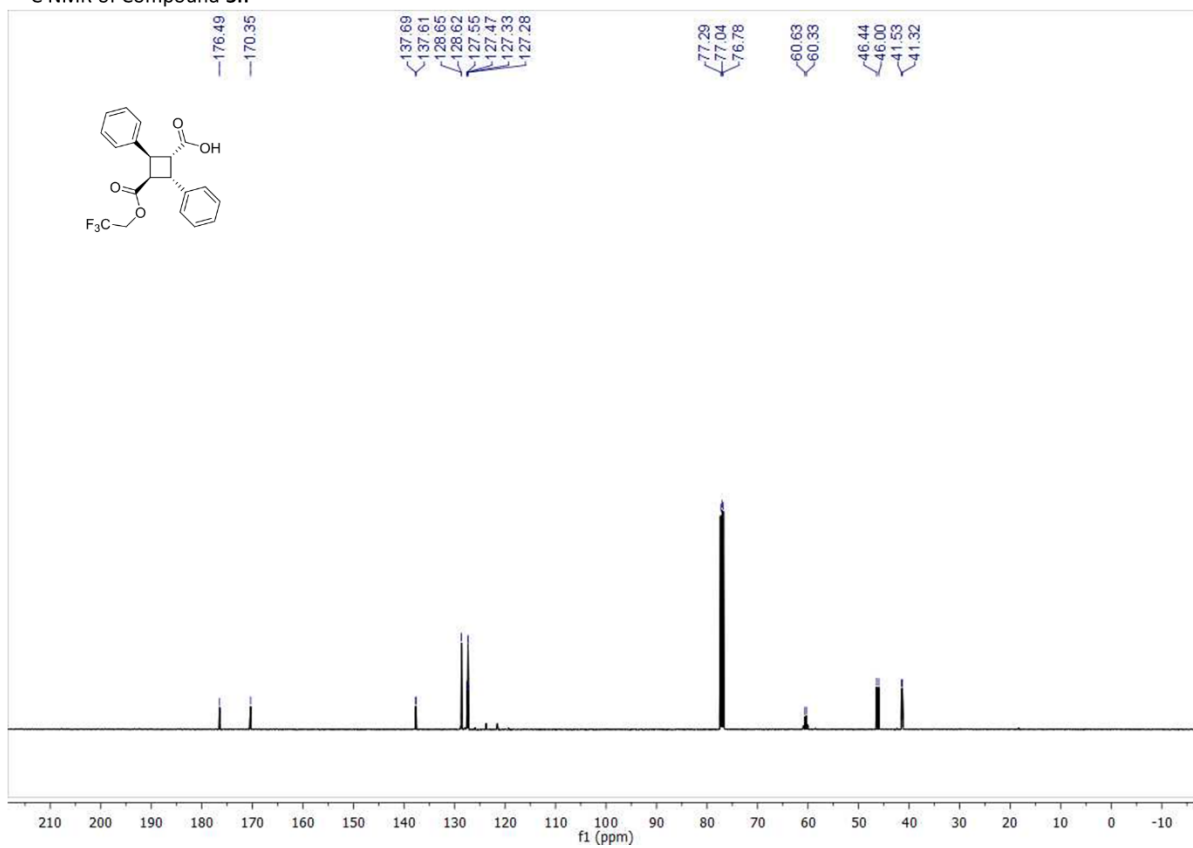

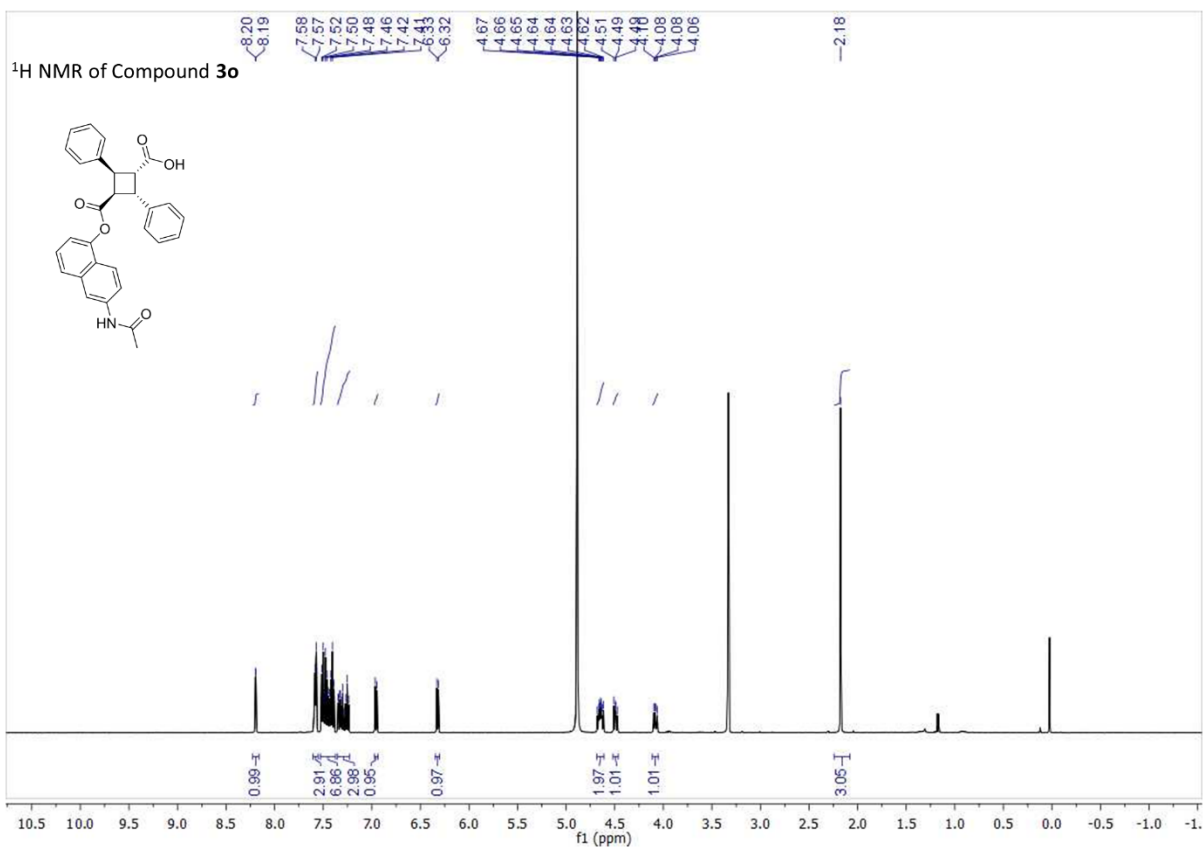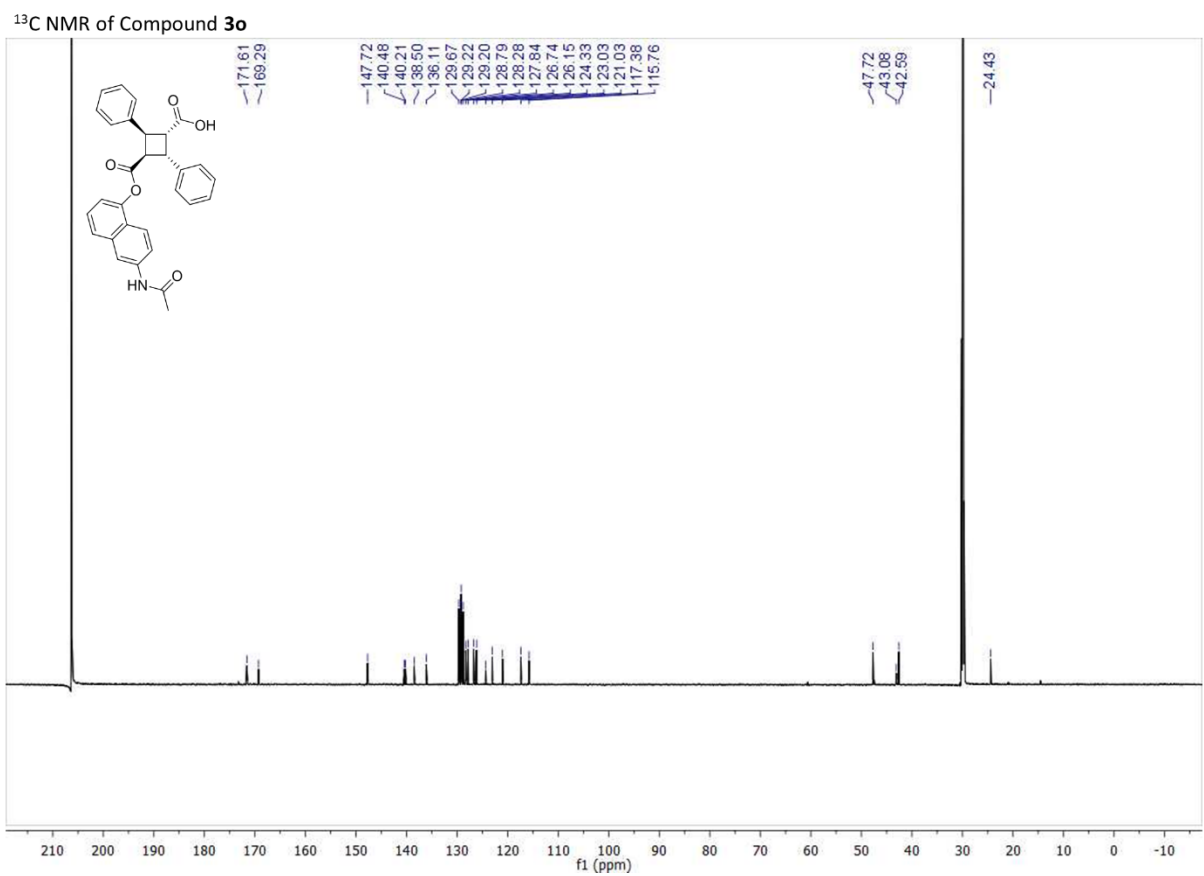

<sup>1</sup>H NMR of Compound 3p

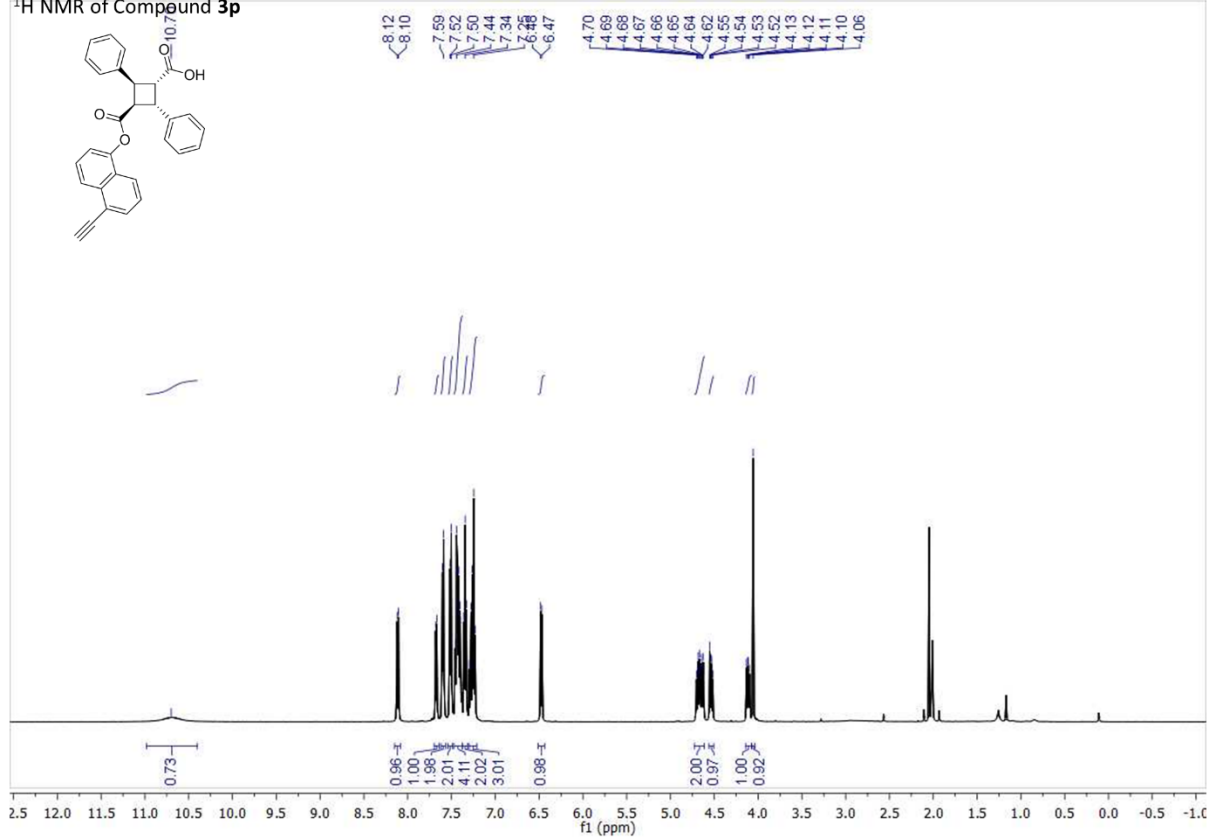

<sup>13</sup>C NMR of Compound 3p

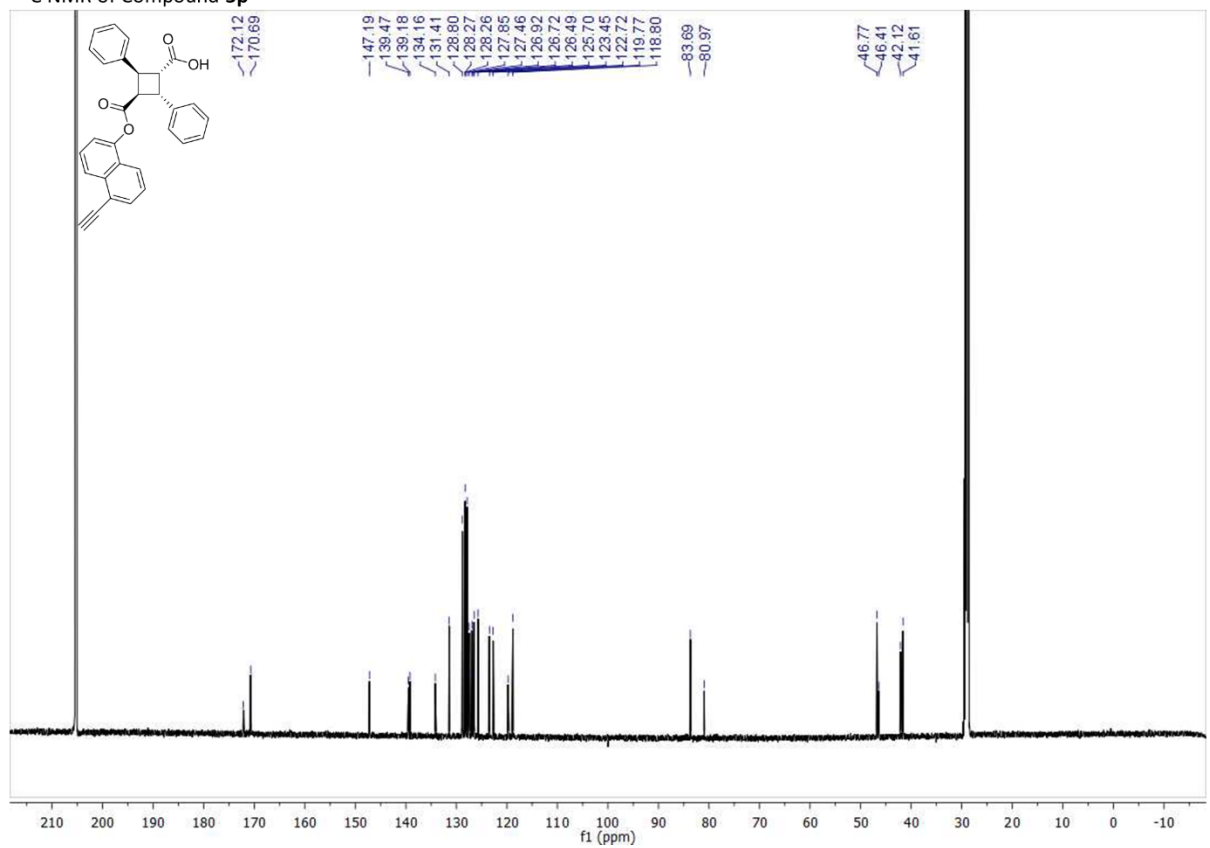

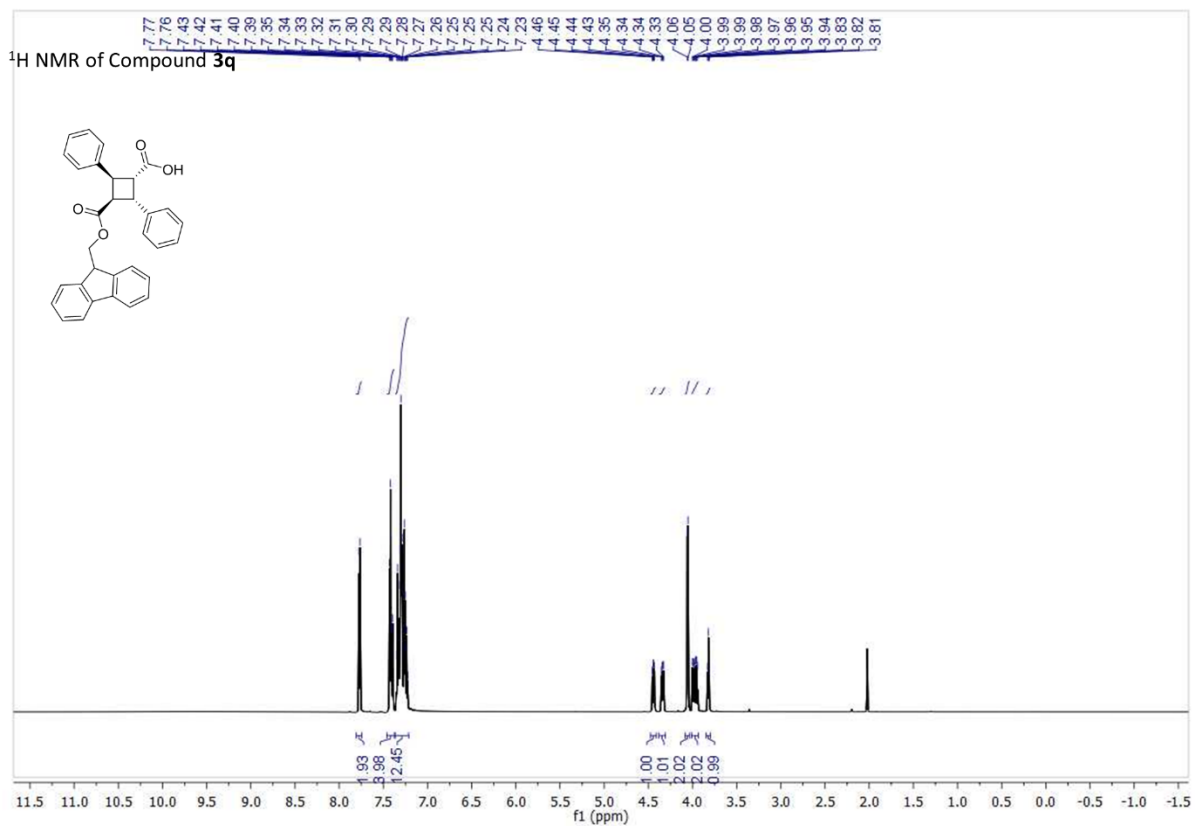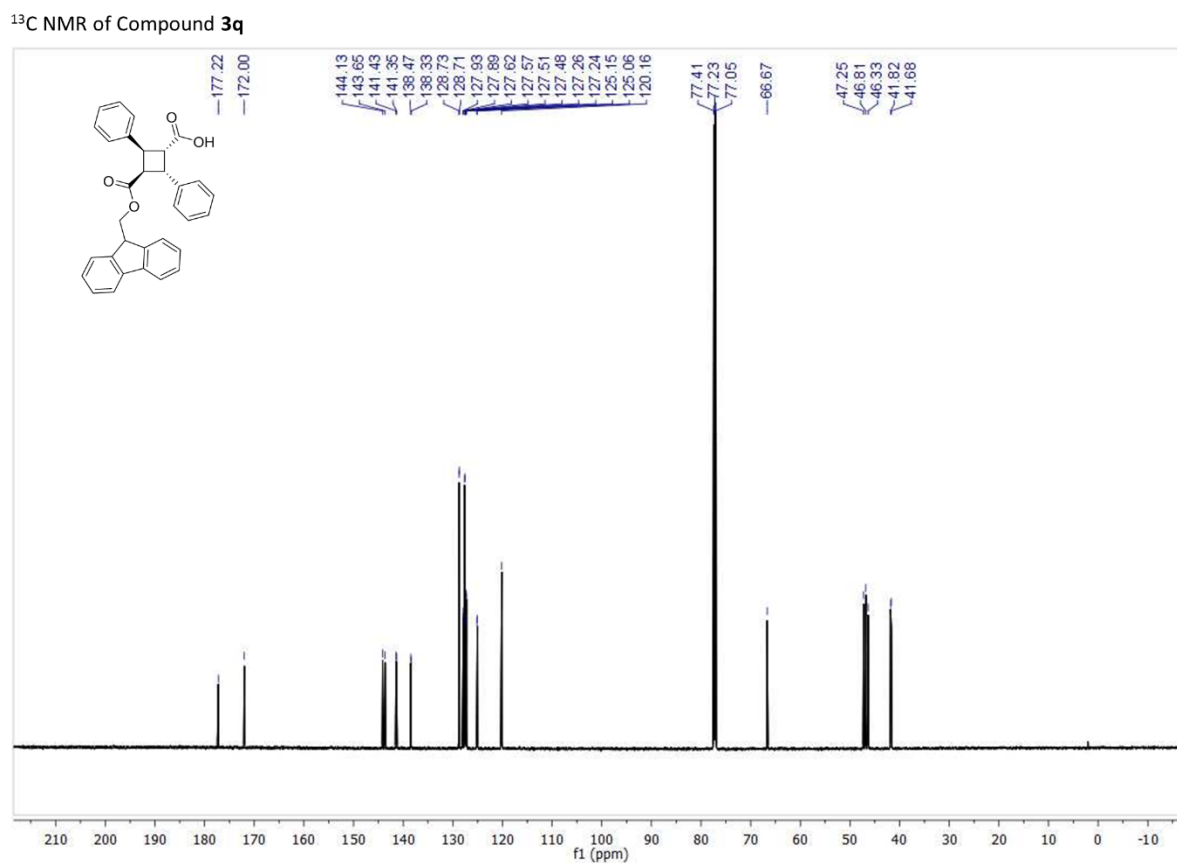

<sup>1</sup>H NMR of Compound 3r

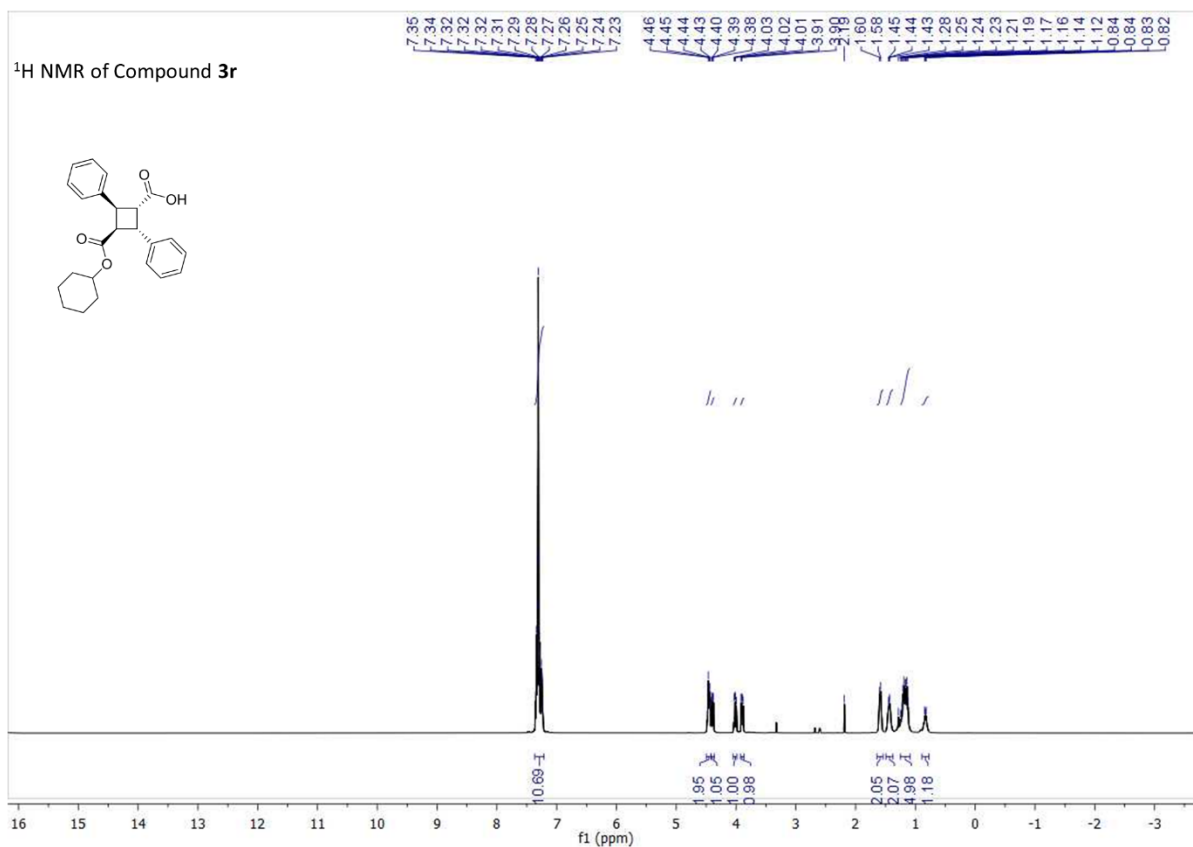

<sup>13</sup>C NMR of Compound 3r

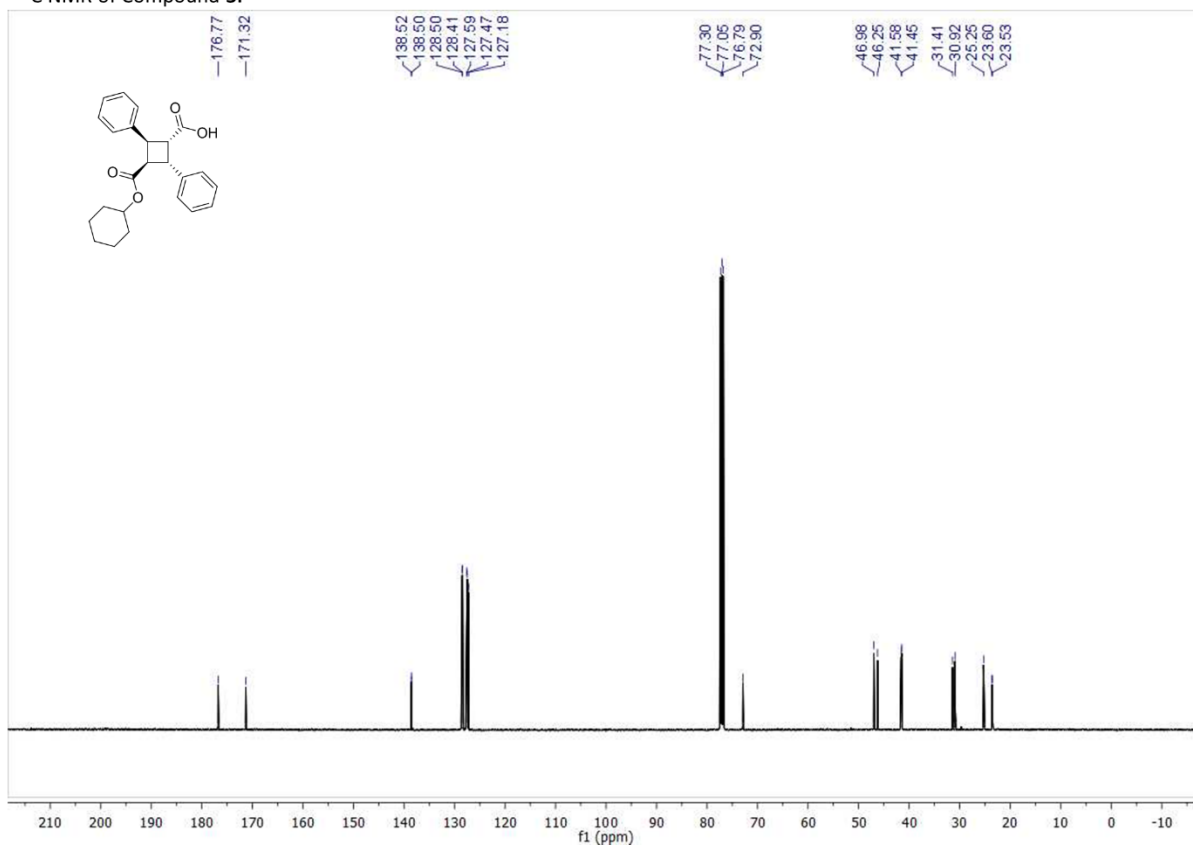

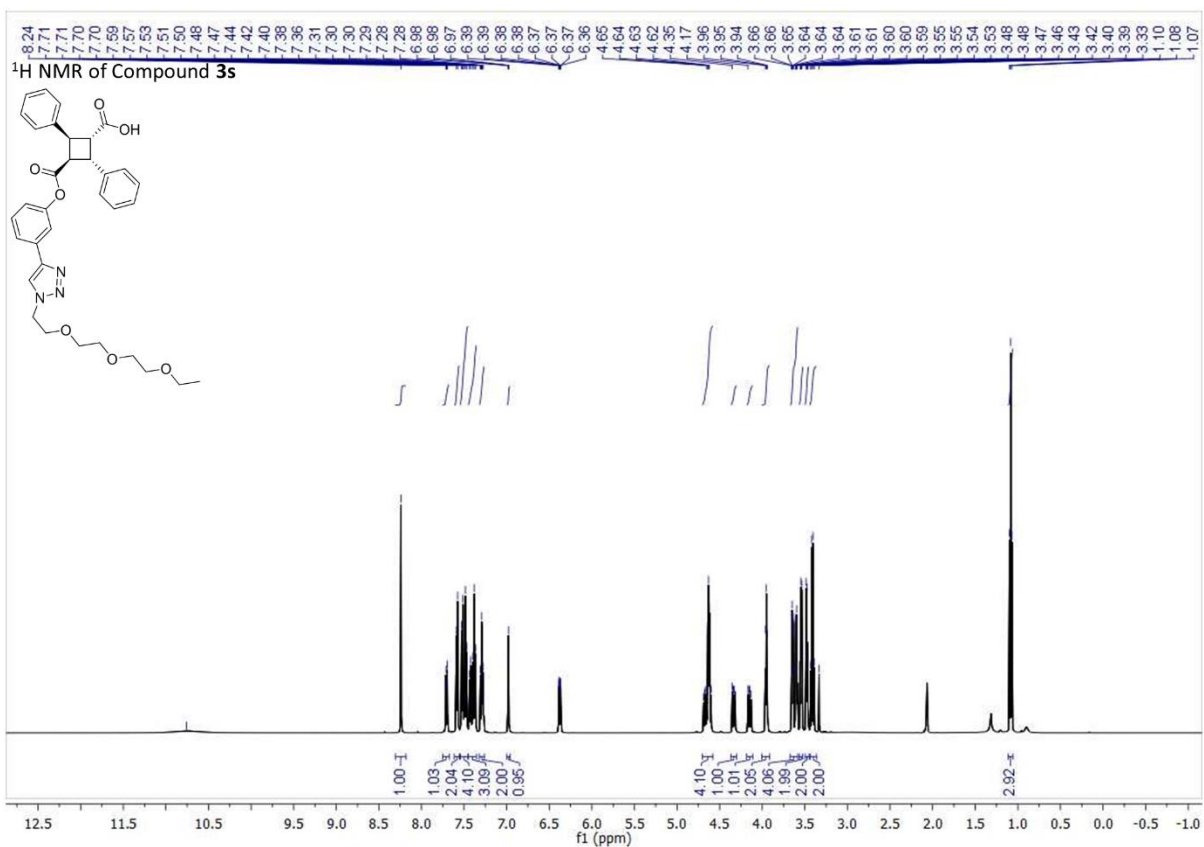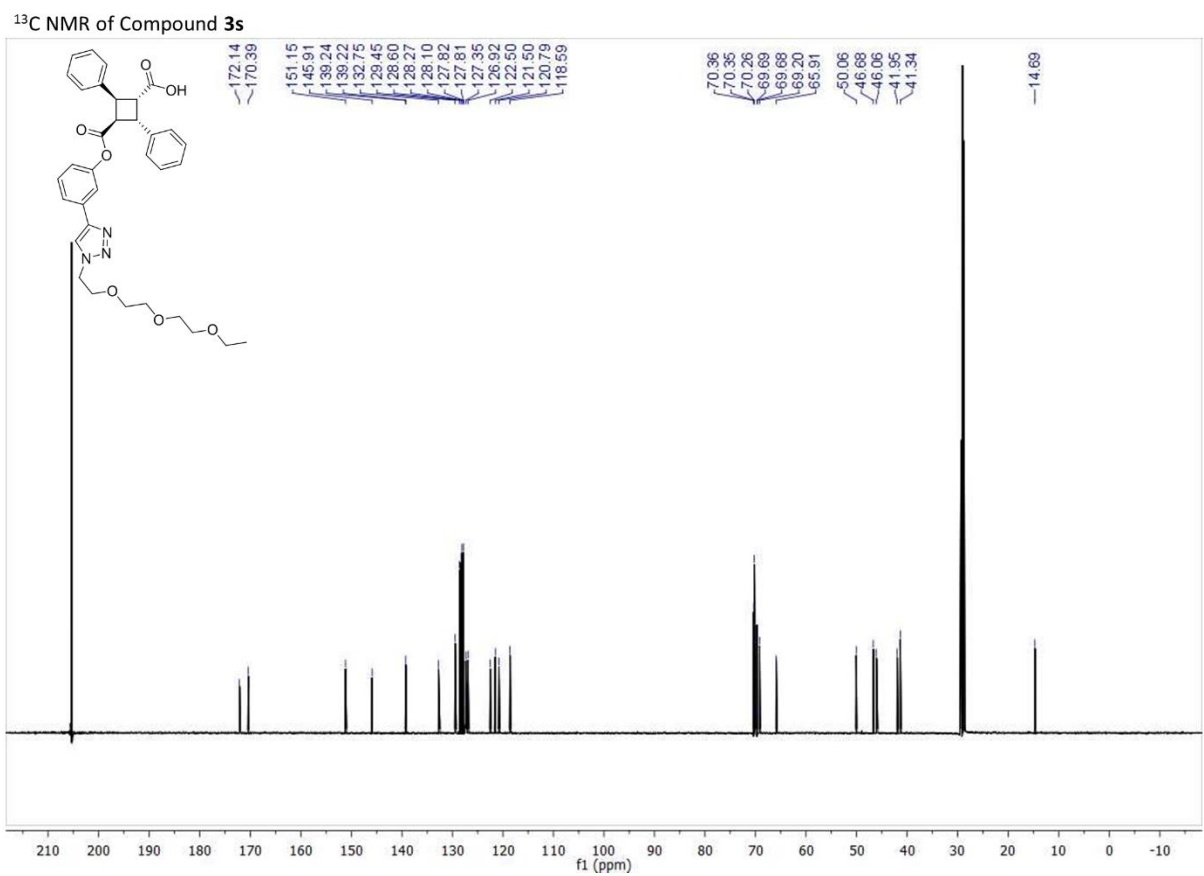

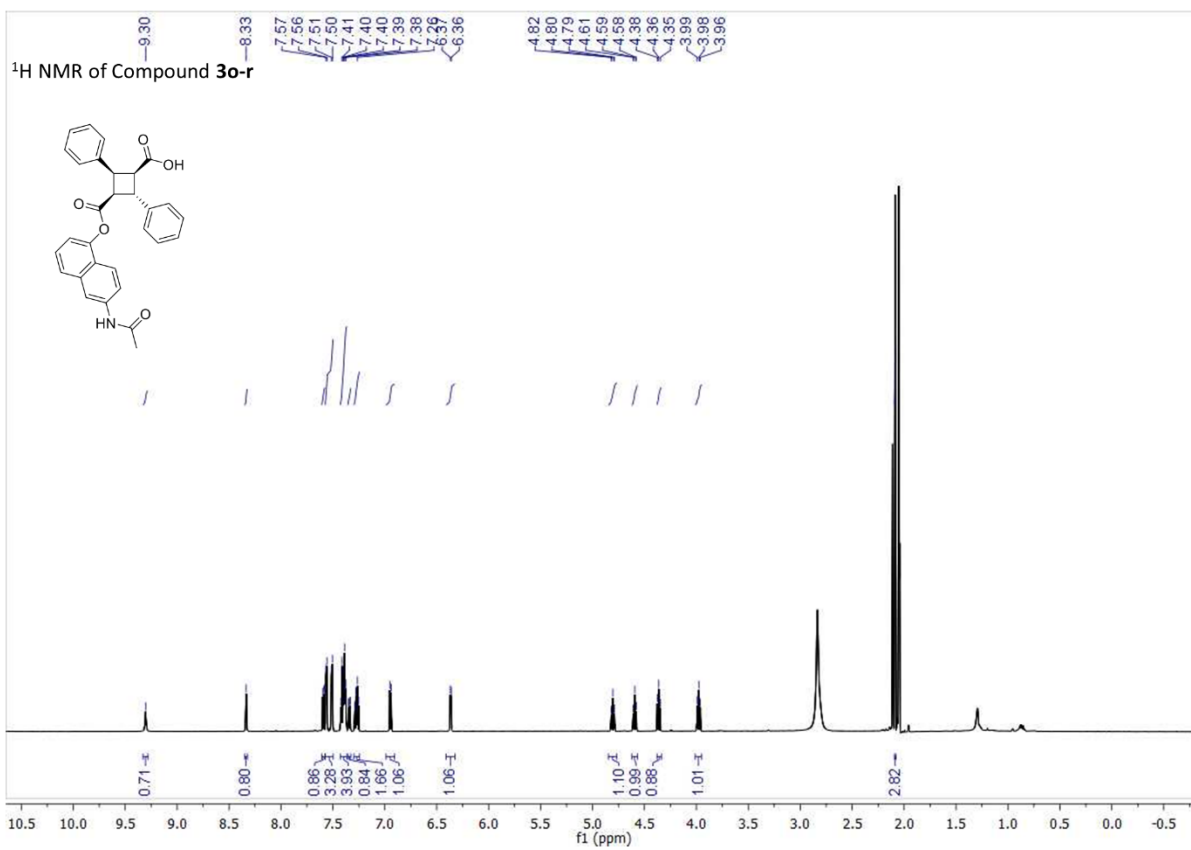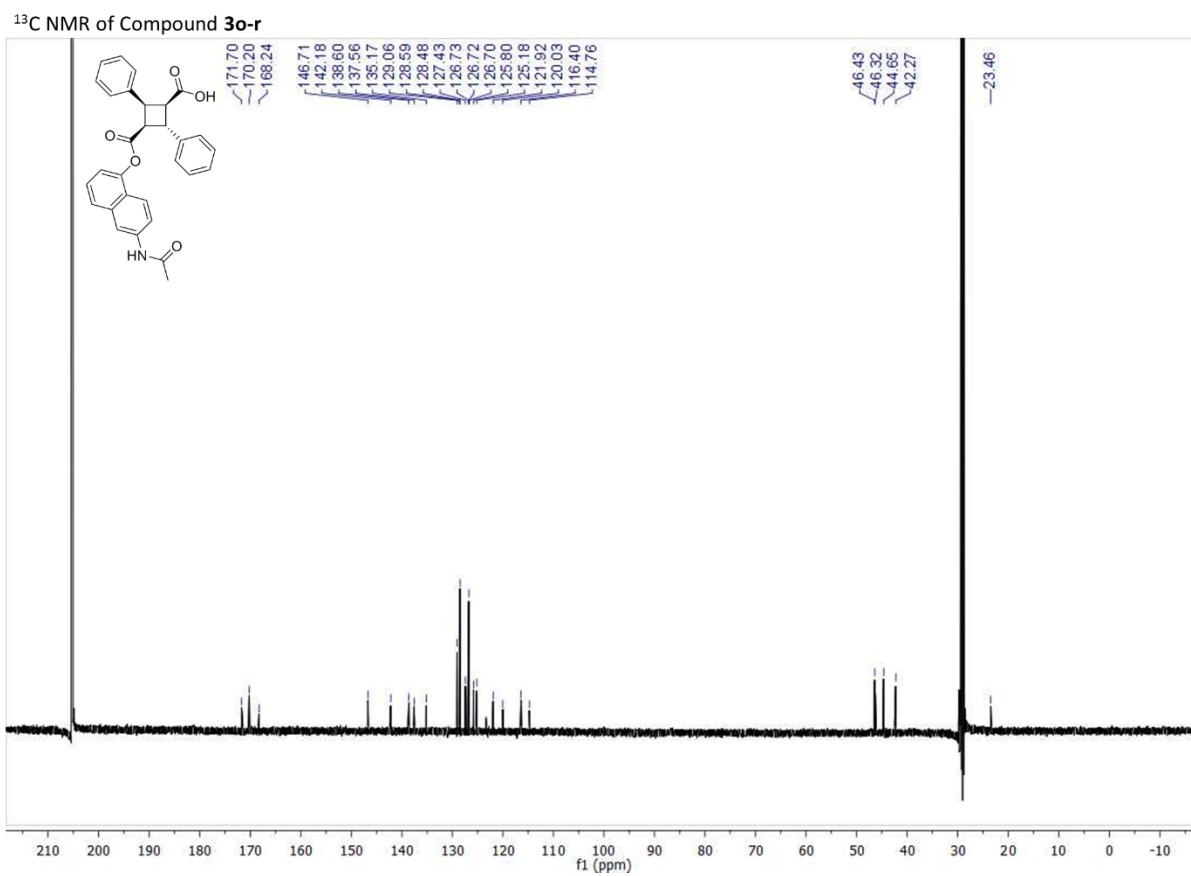



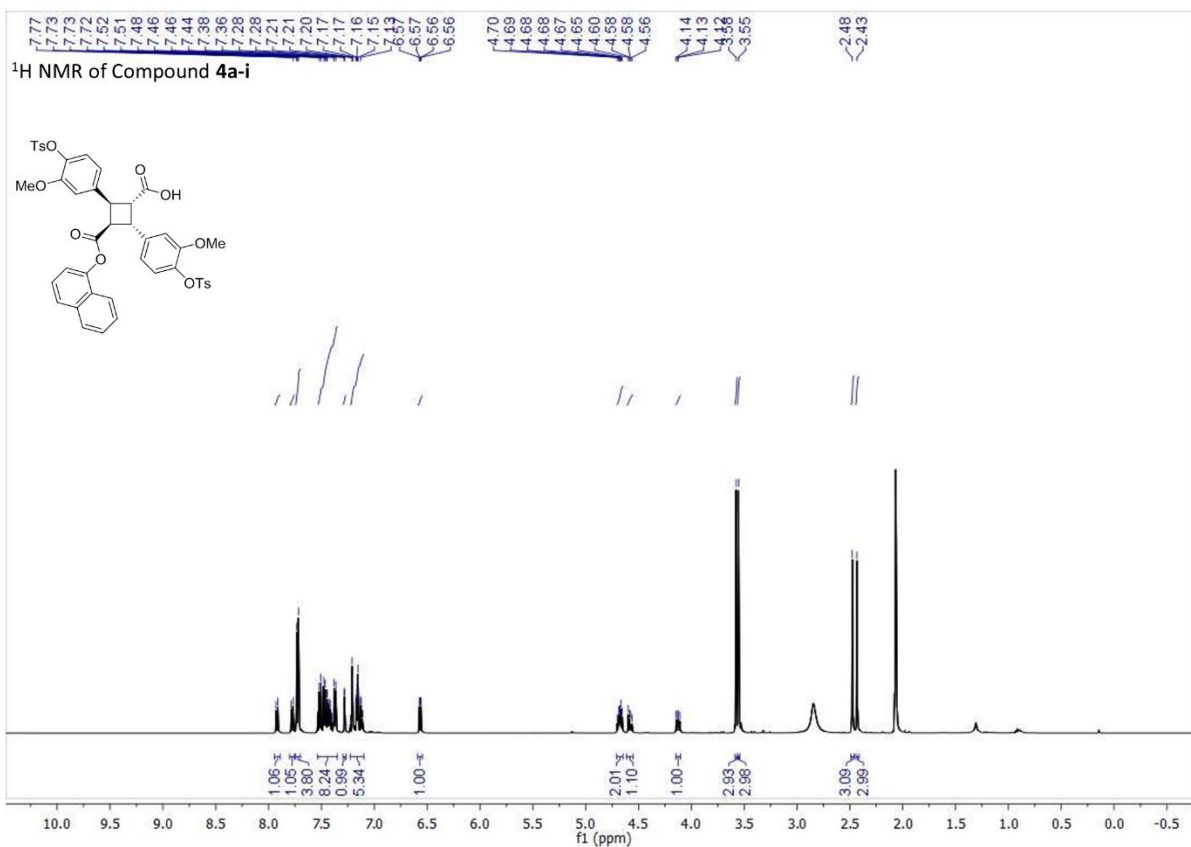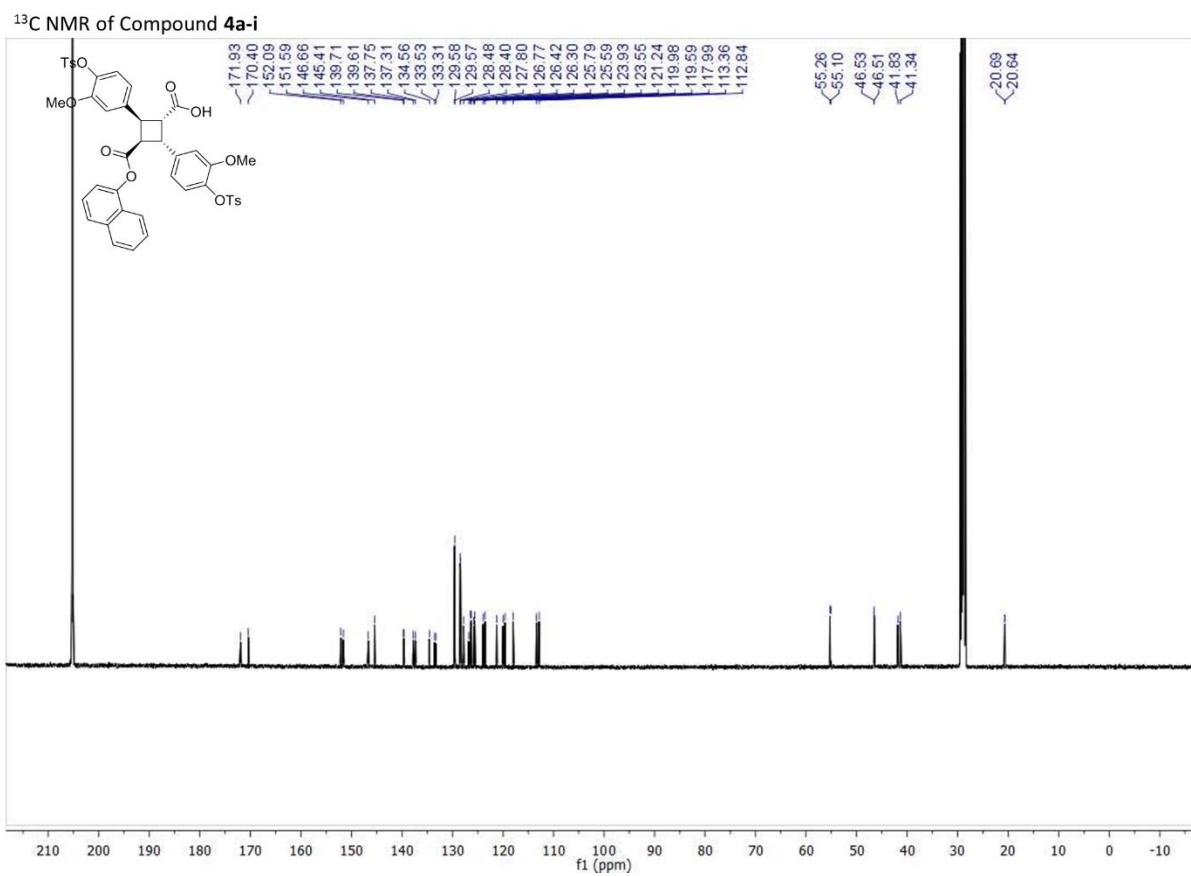

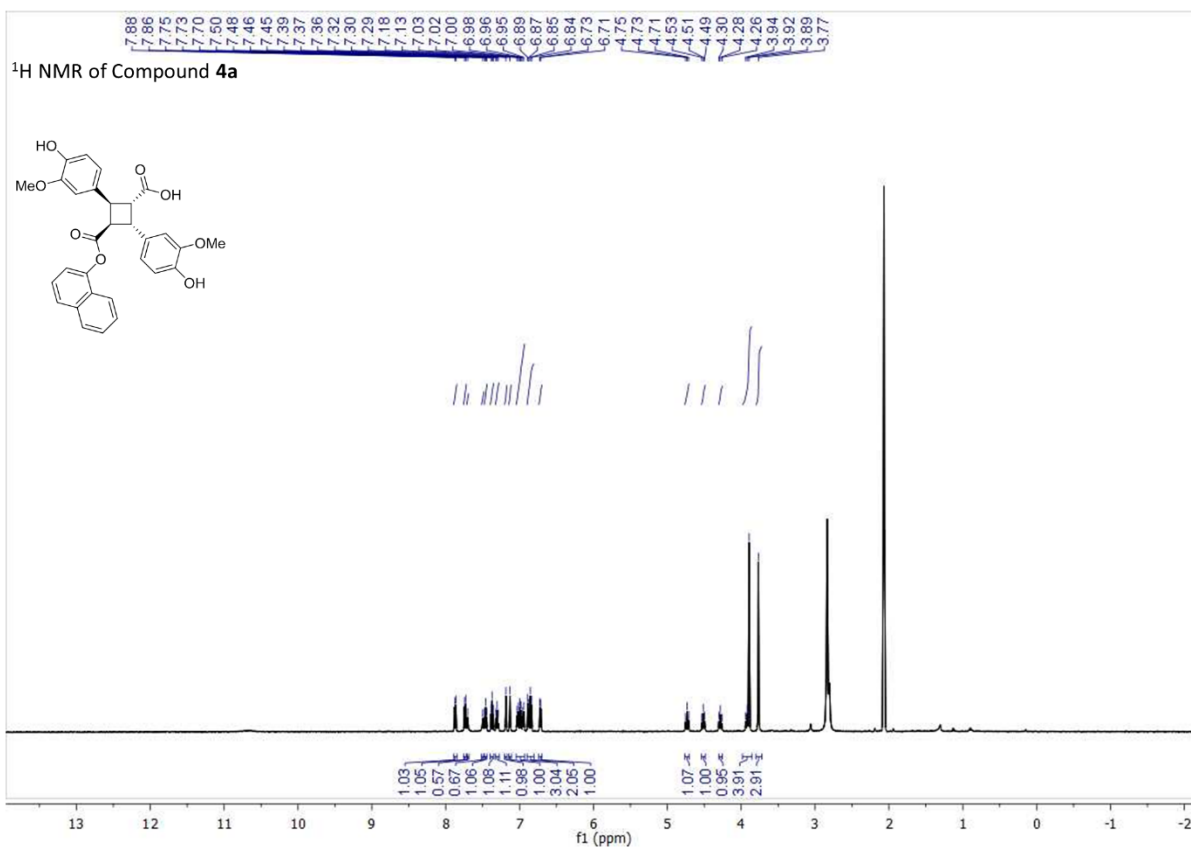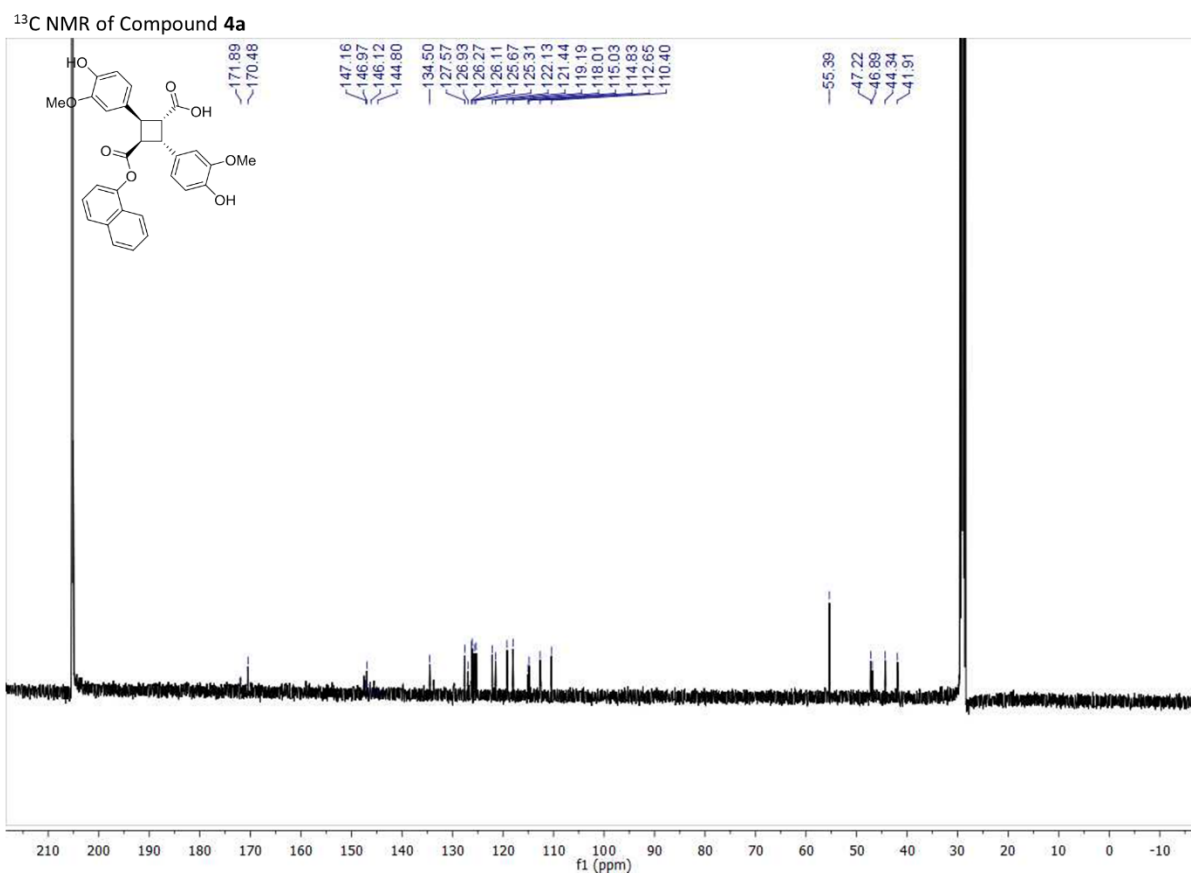

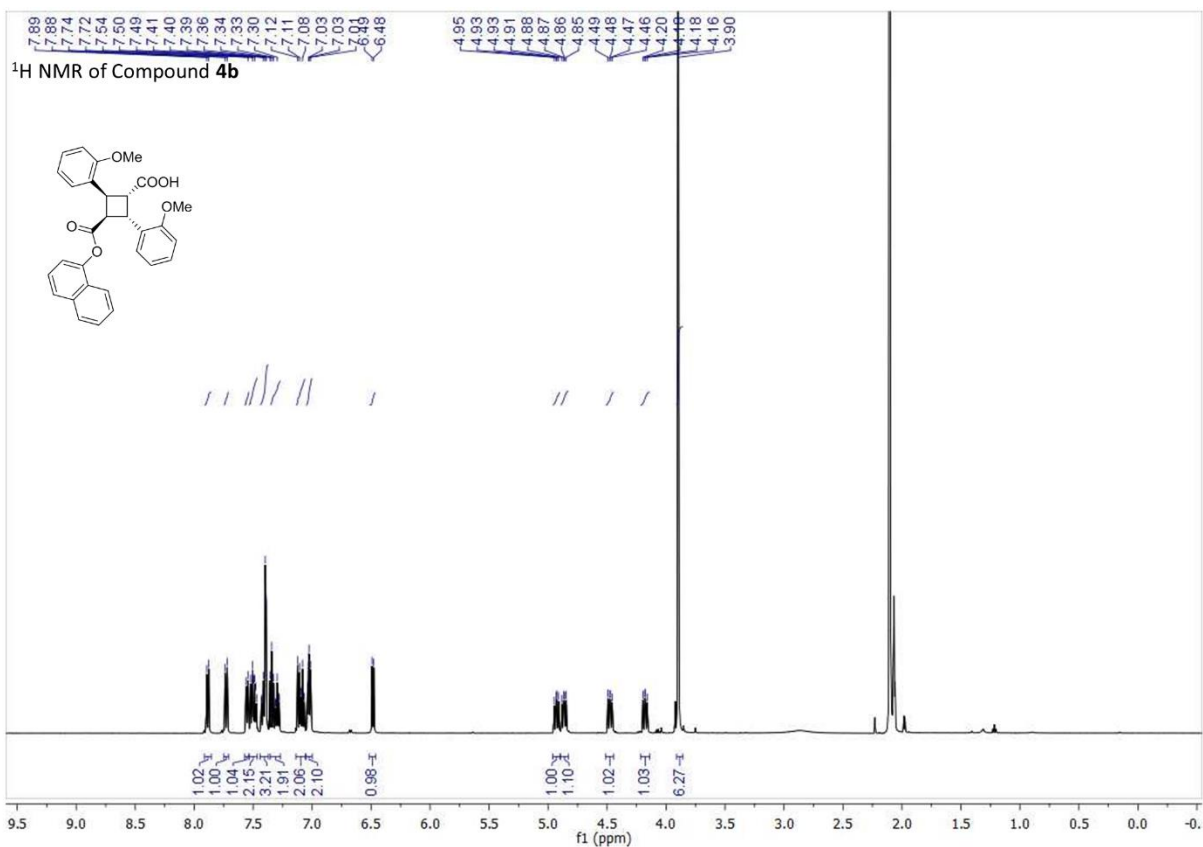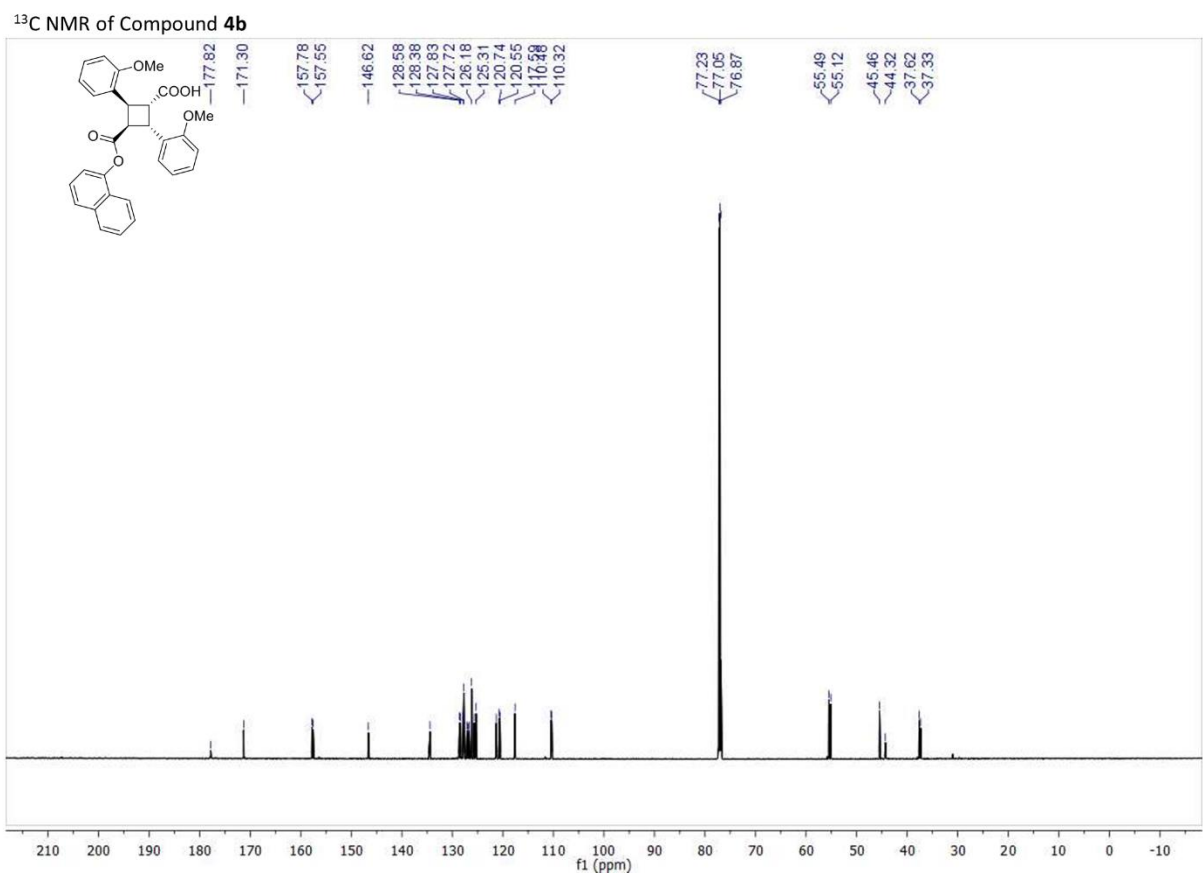

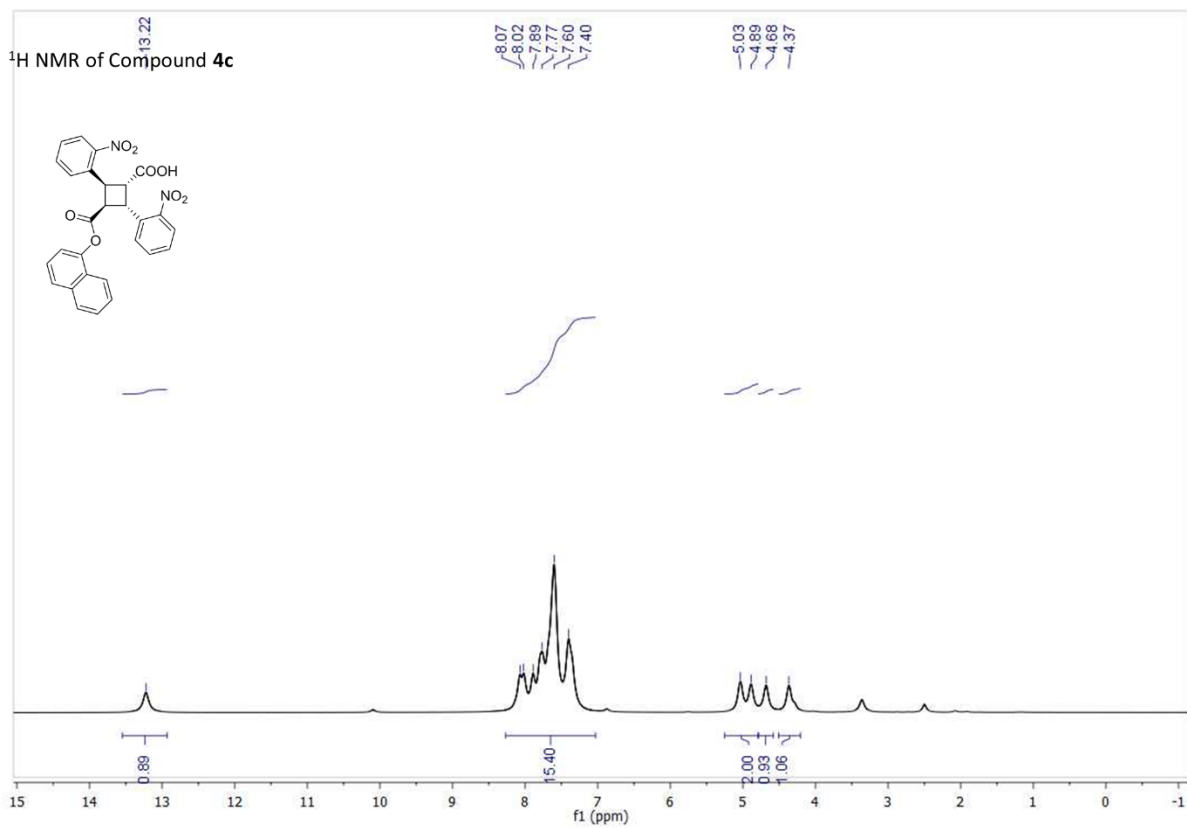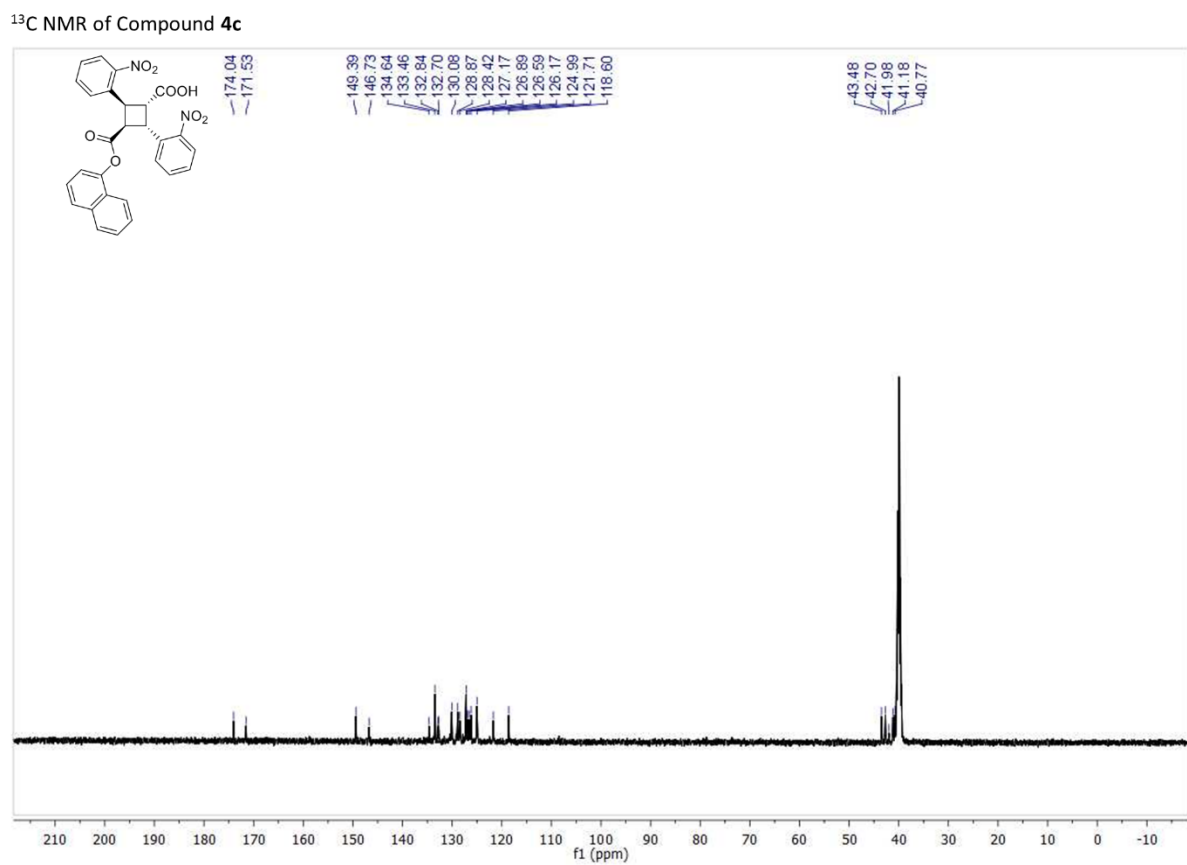

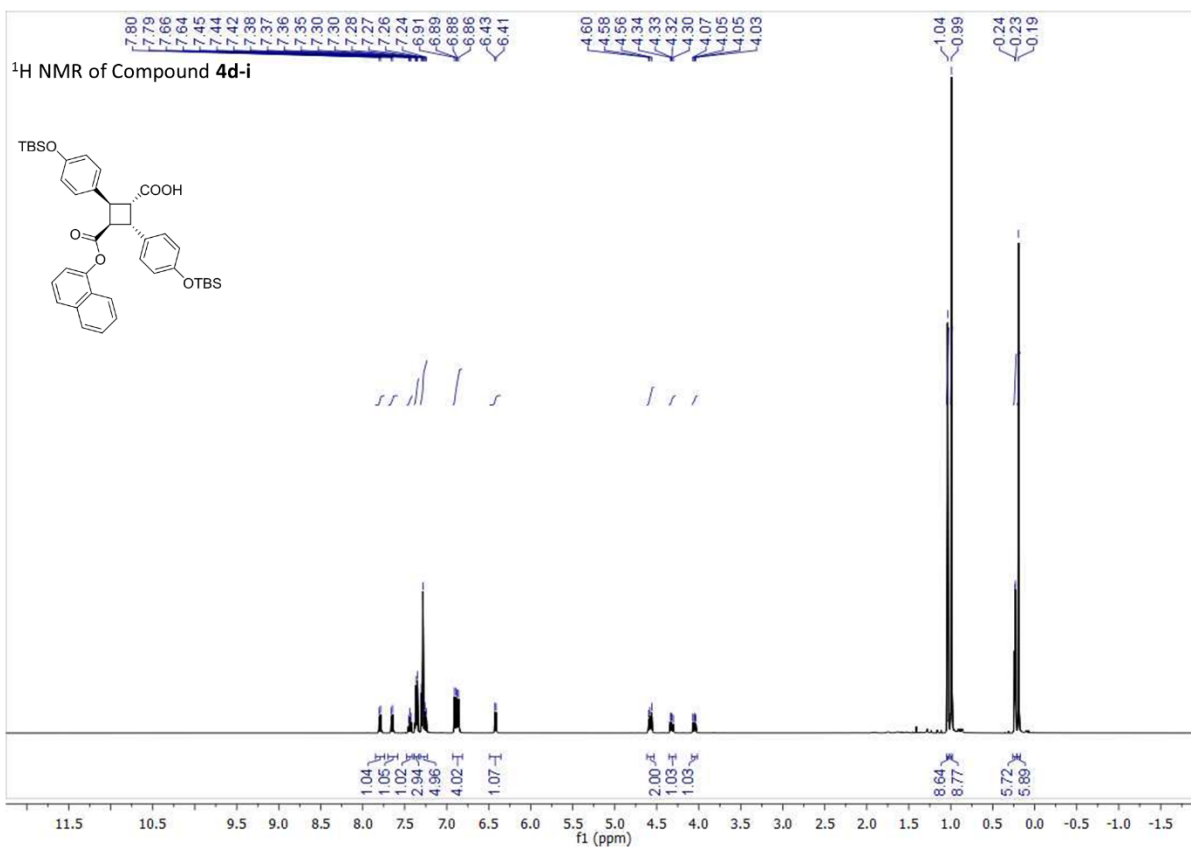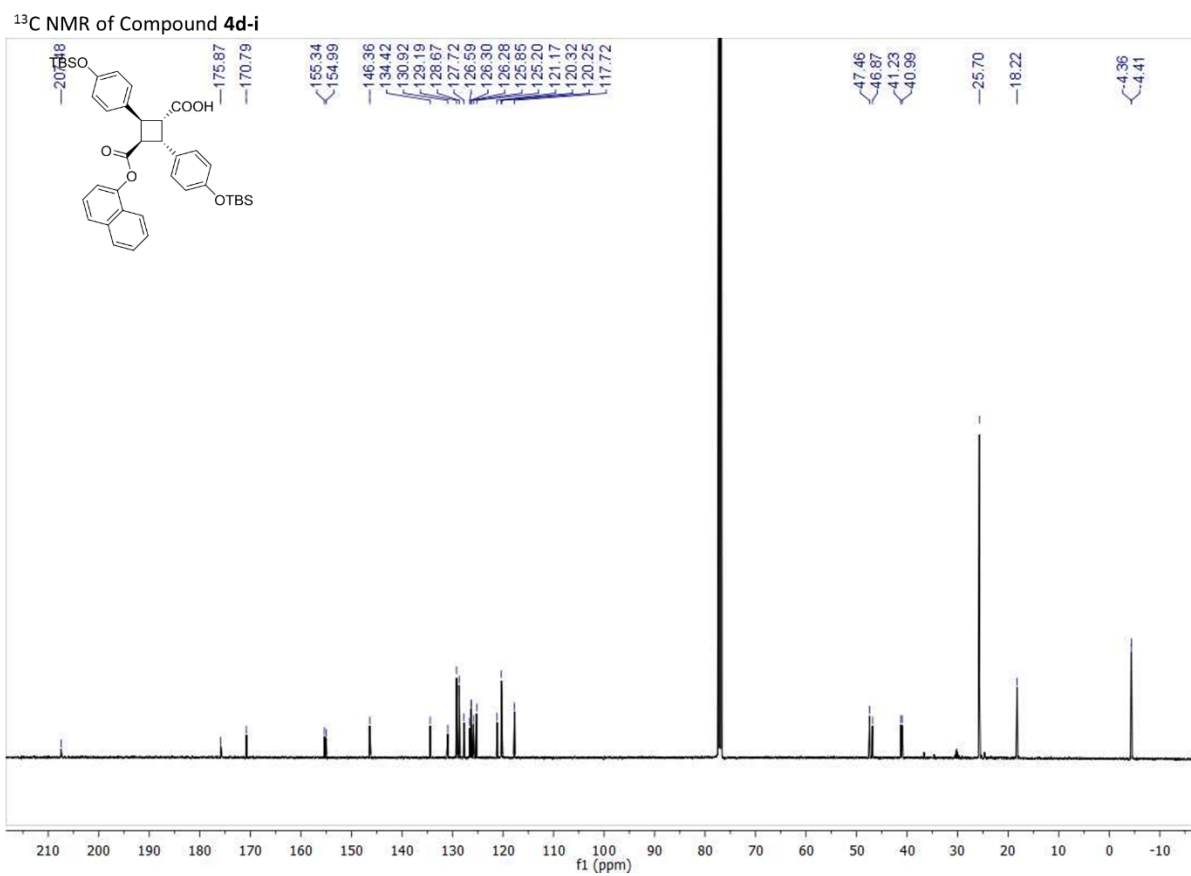

<sup>1</sup>H NMR of Compound 4d

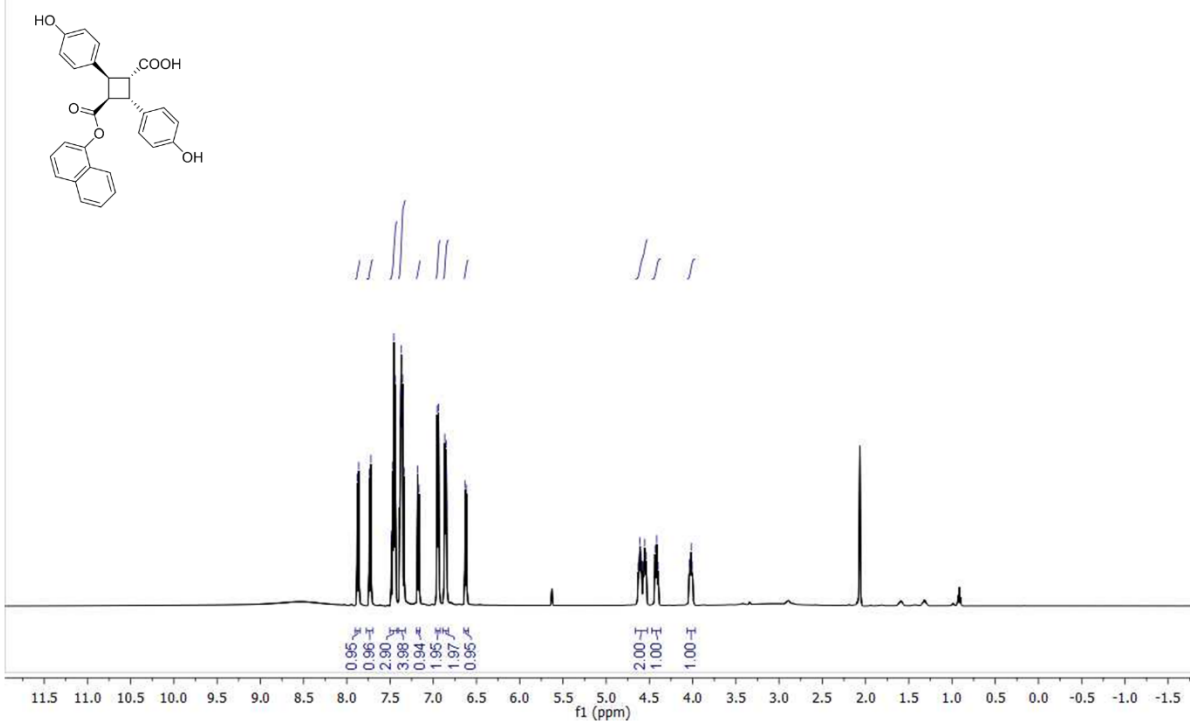

<sup>13</sup>C NMR of Compound 4d

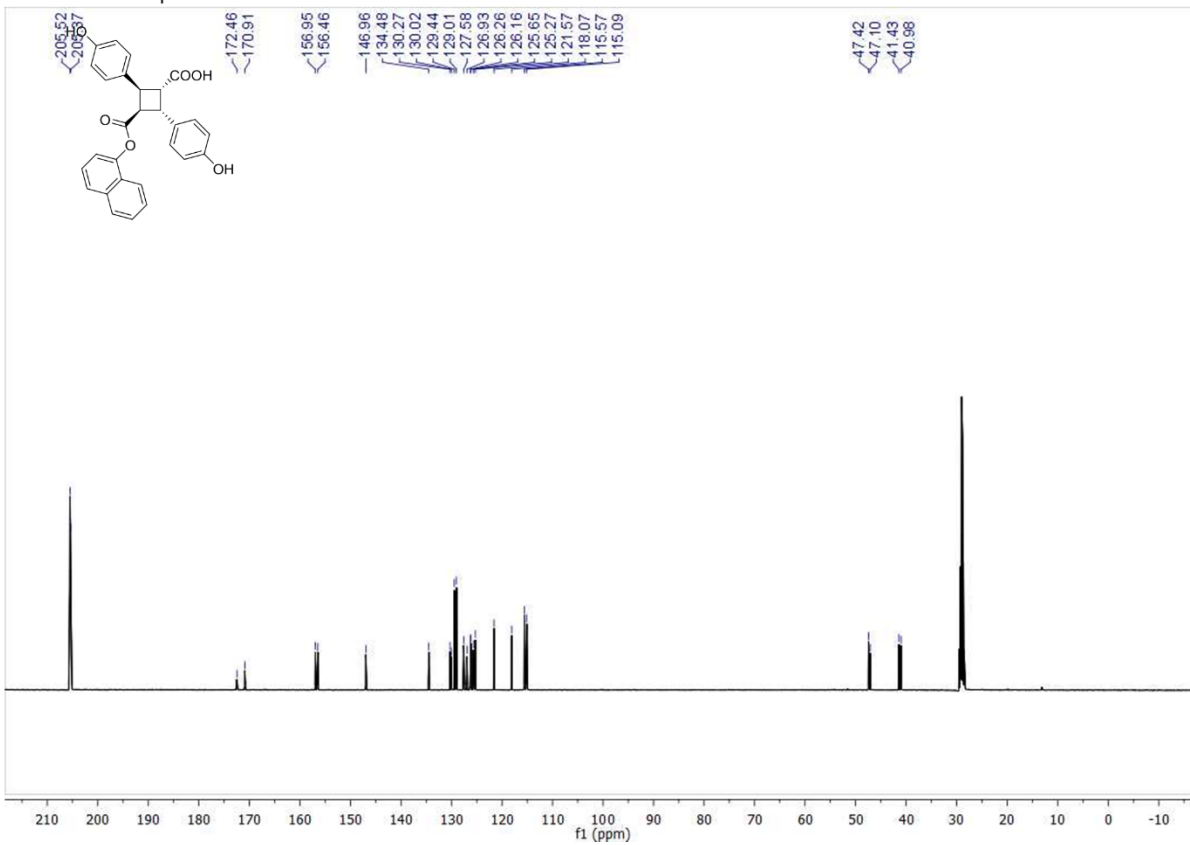

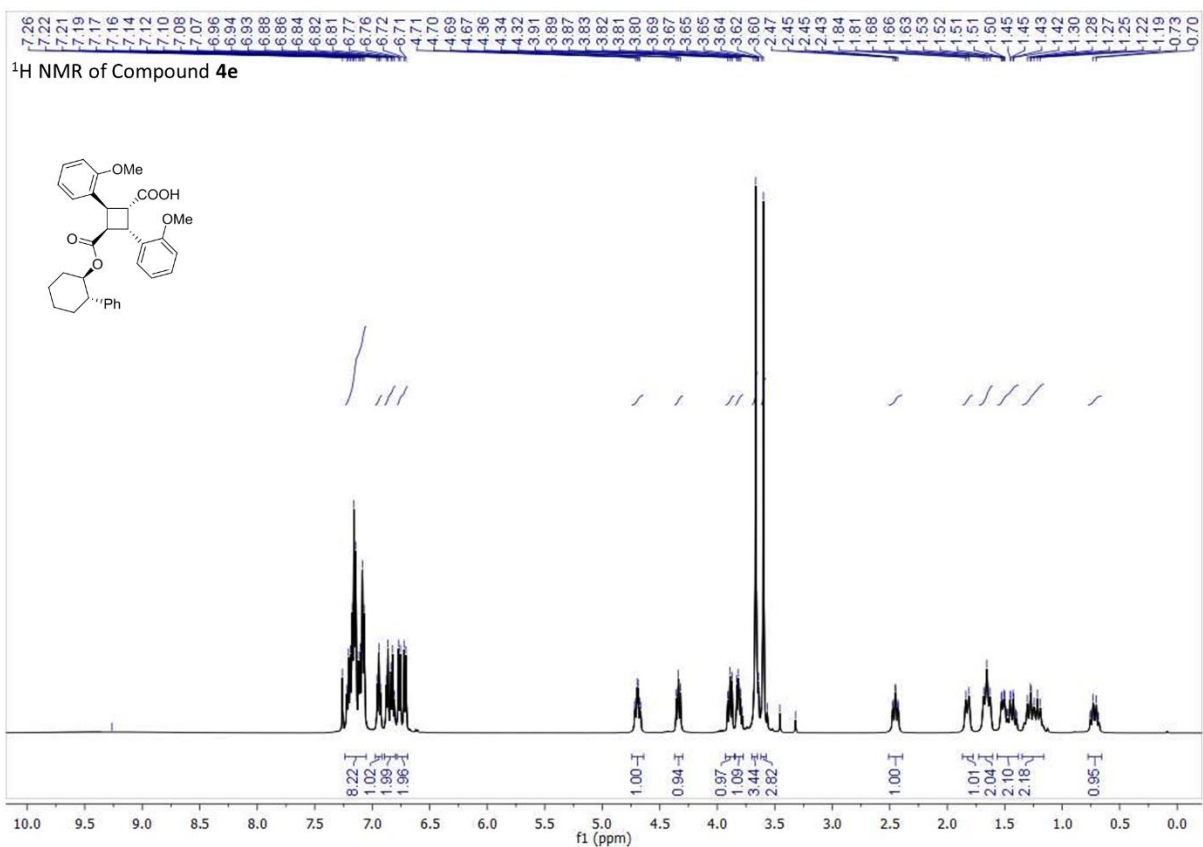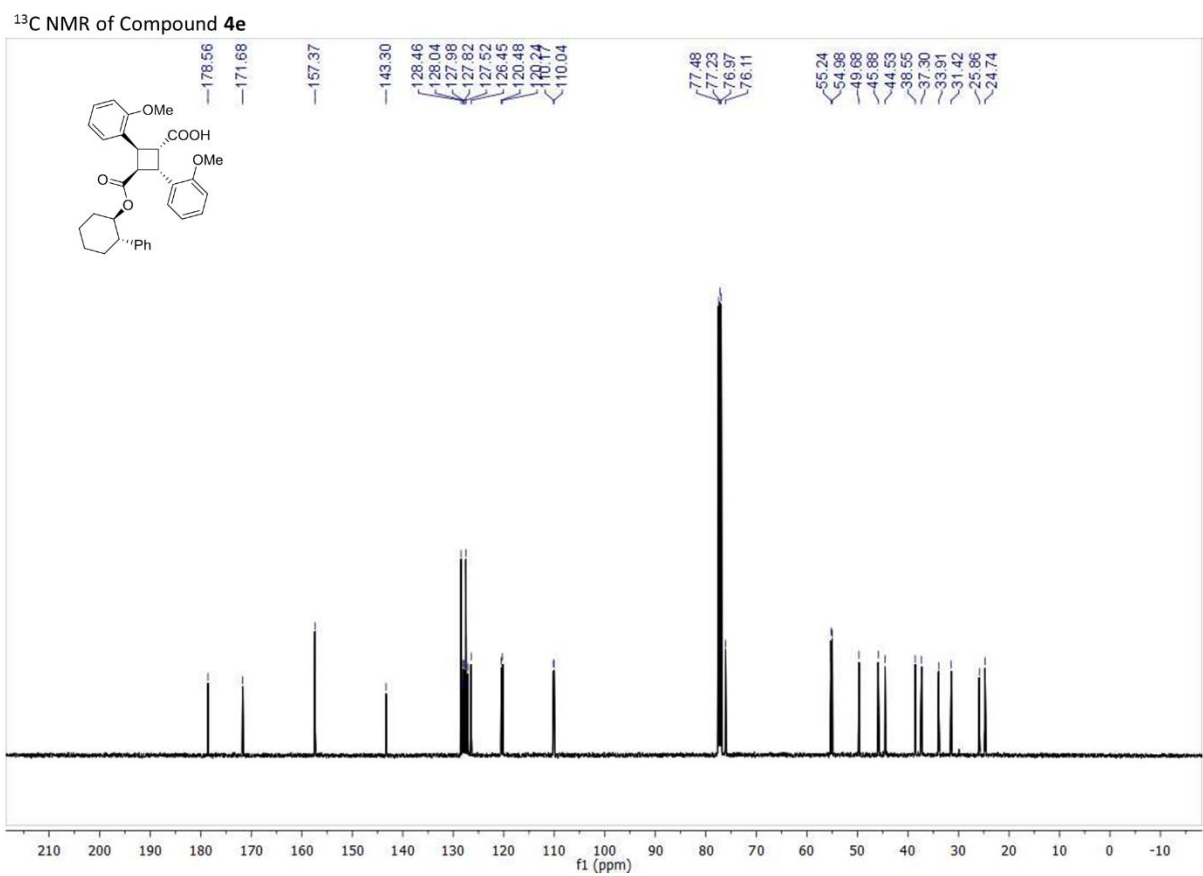

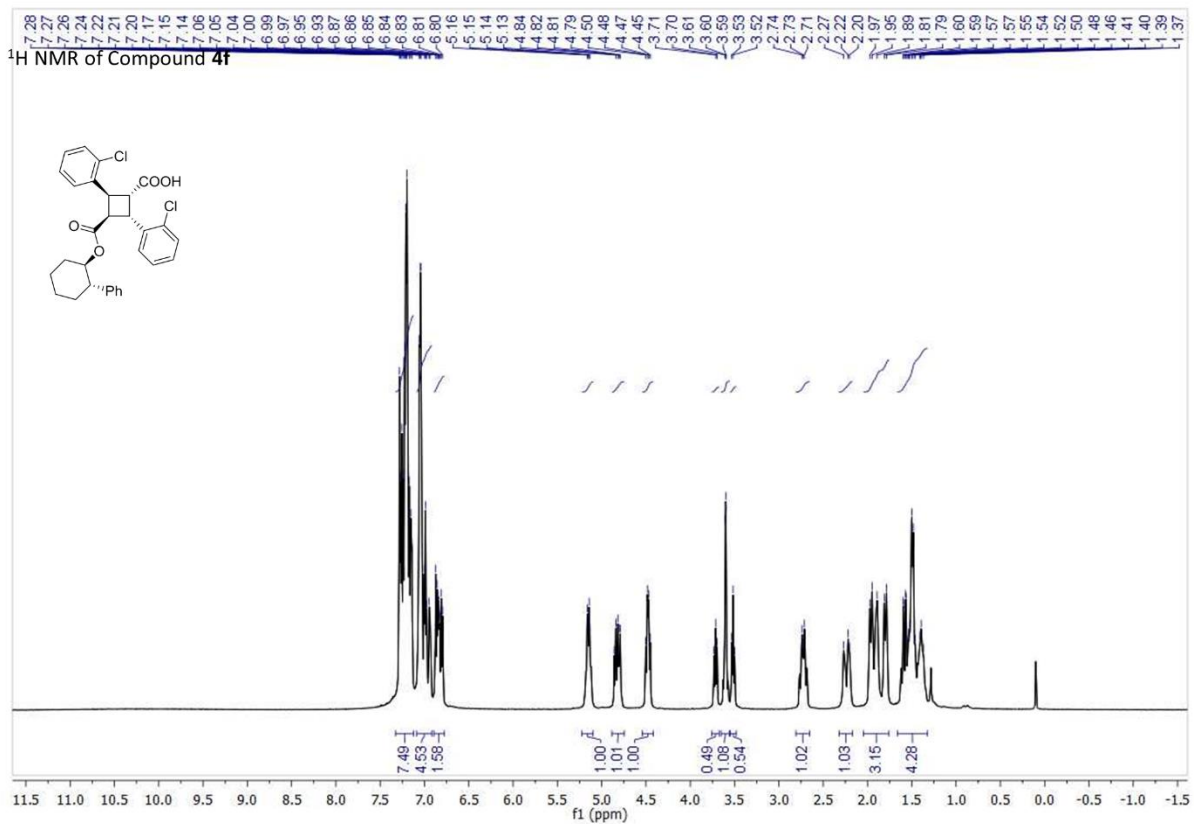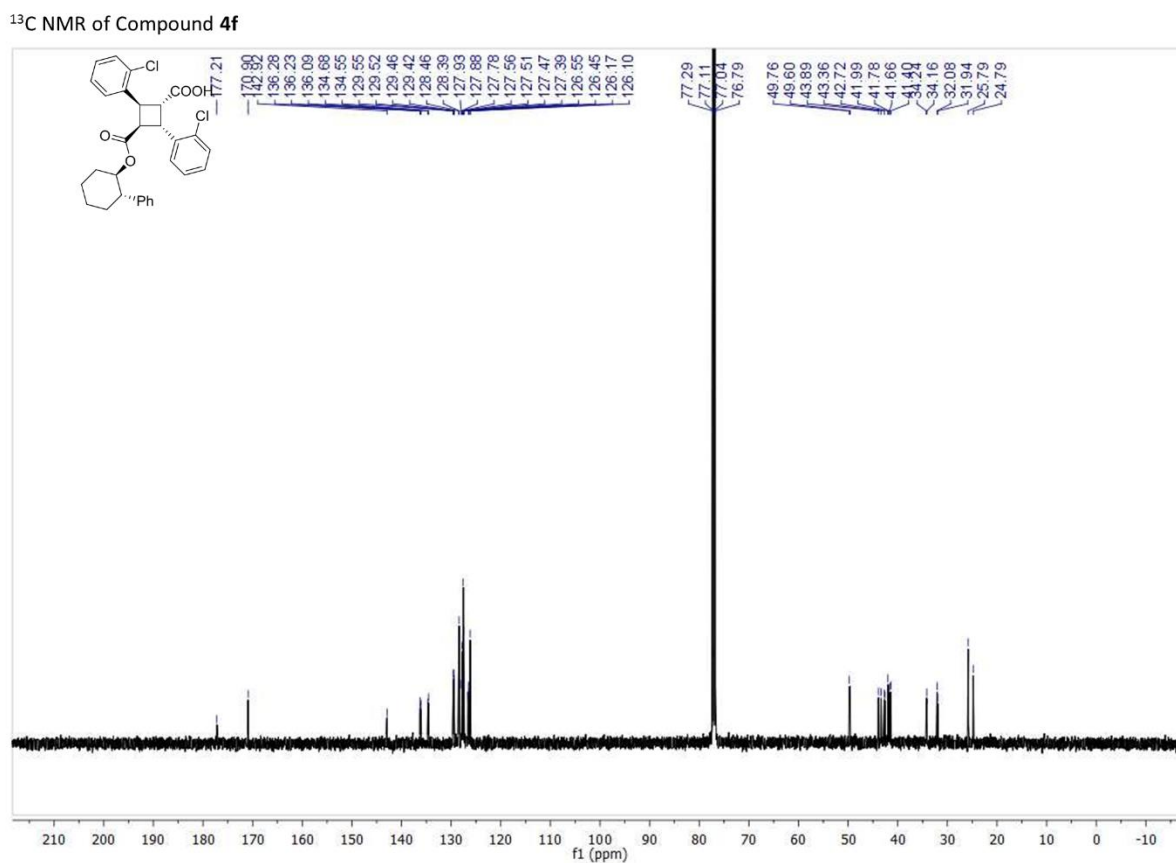



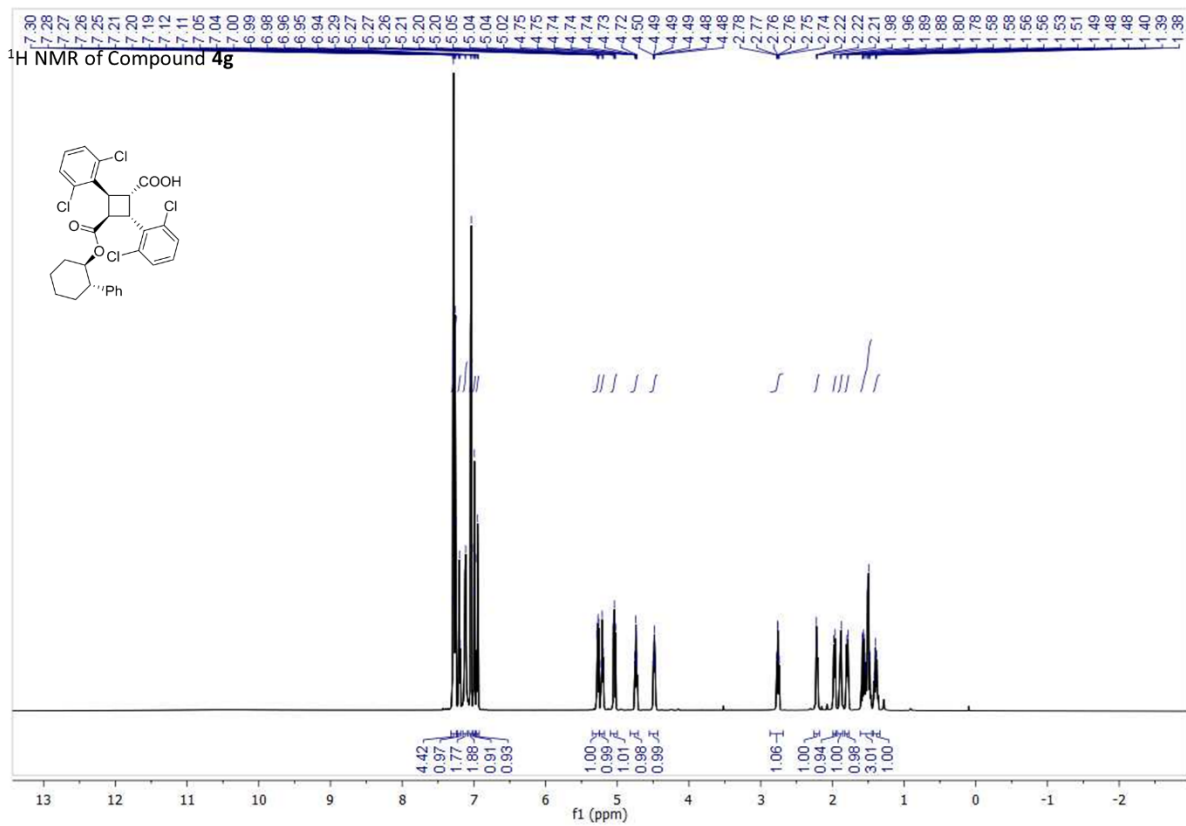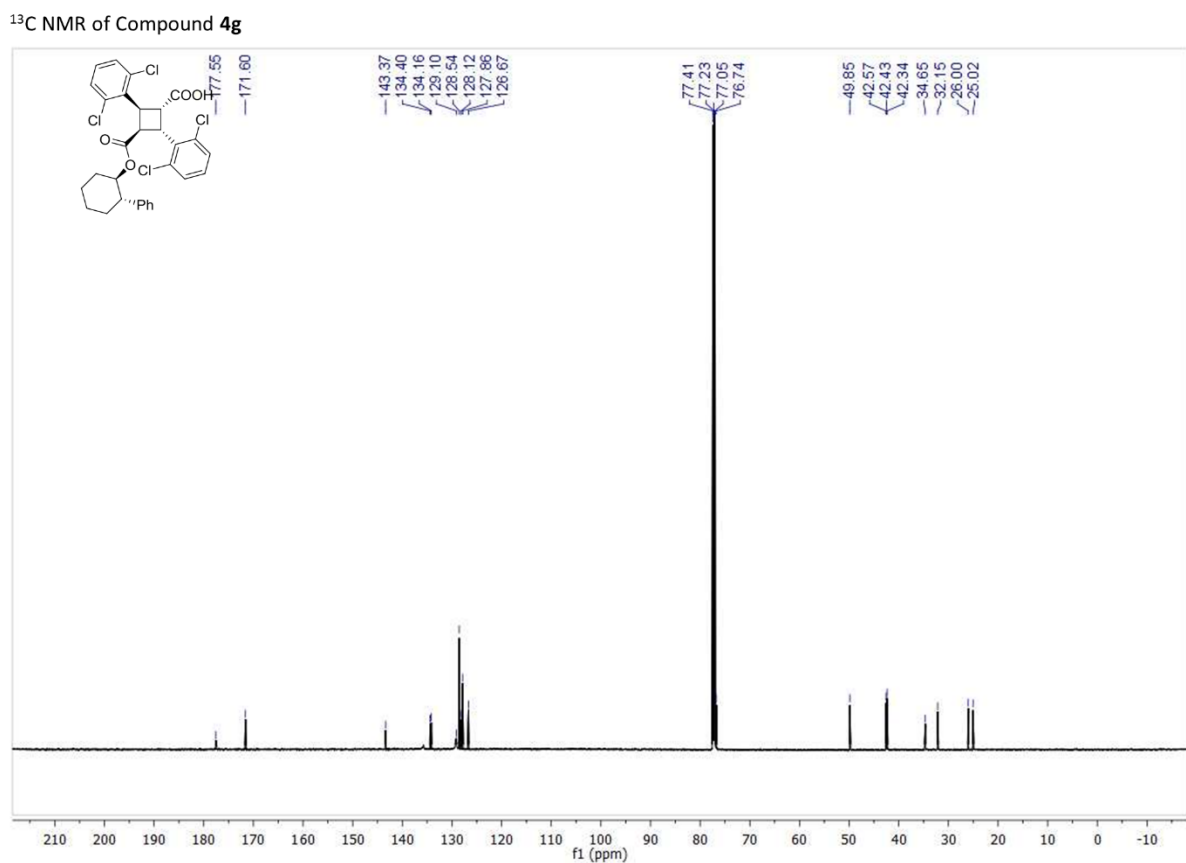

<sup>1</sup>H NMR of Compound 4h

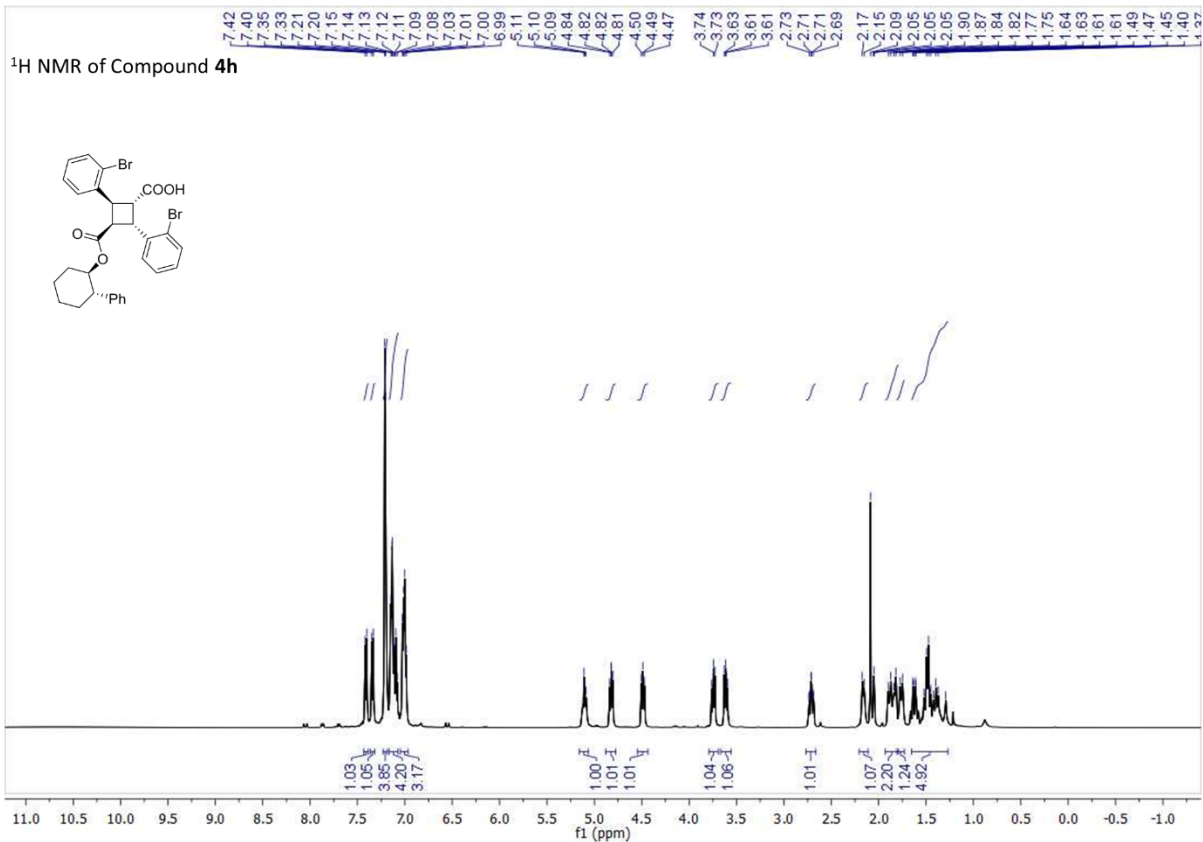

<sup>13</sup>C NMR of Compound 4h

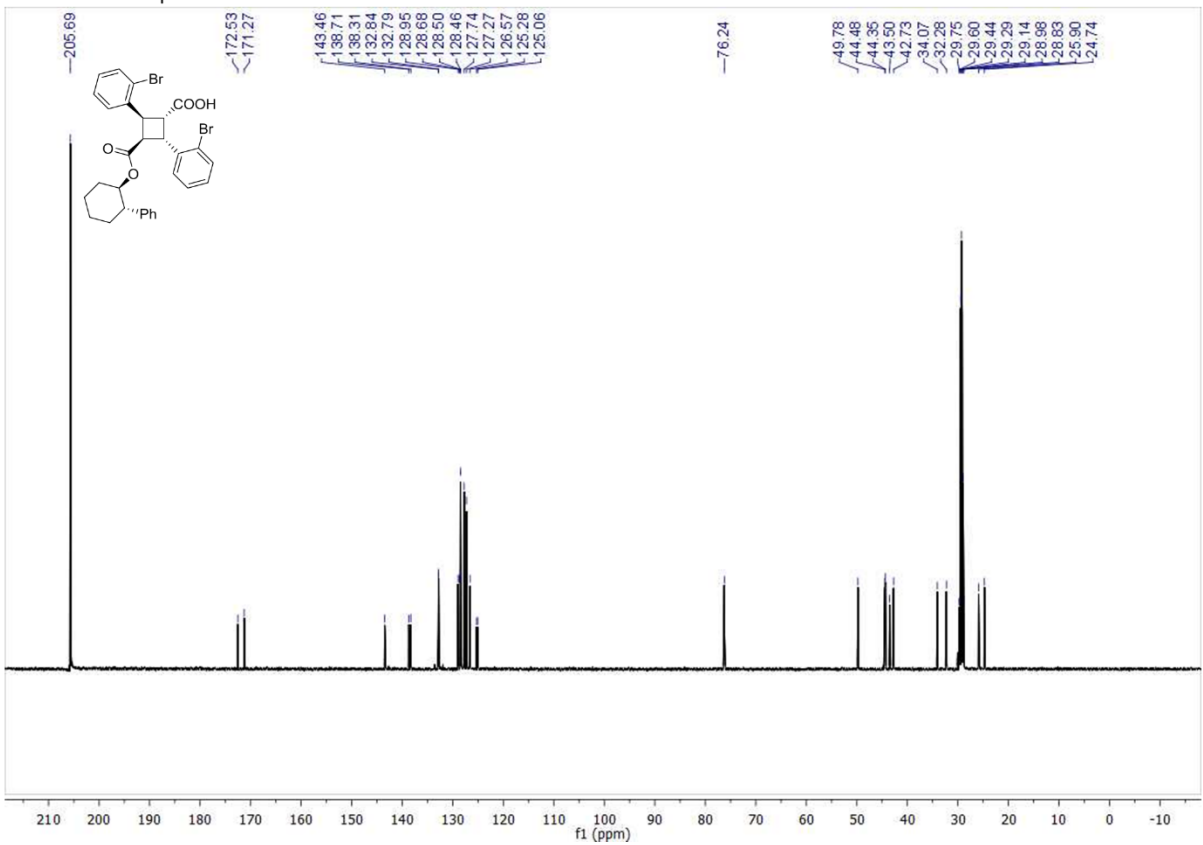

<sup>1</sup>H NMR of Compound 4i

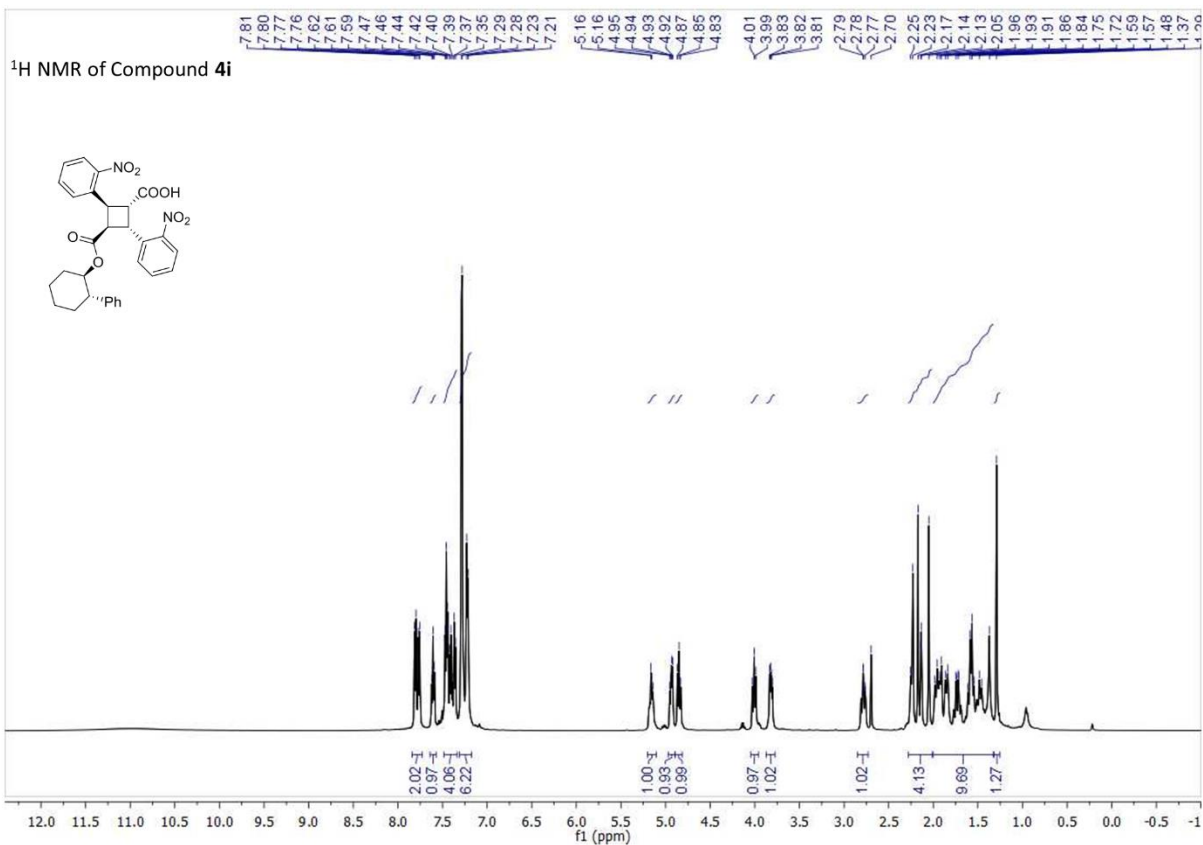

<sup>13</sup>C NMR of Compound 4i

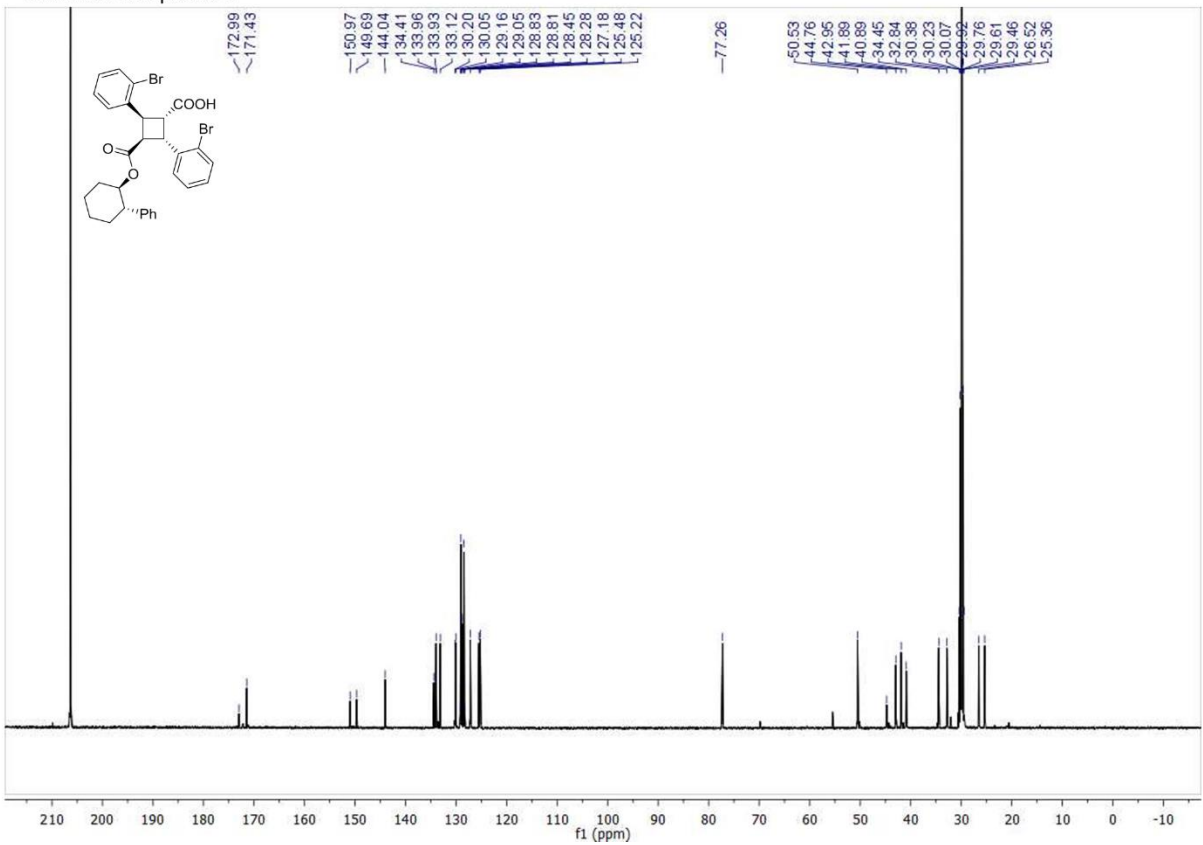

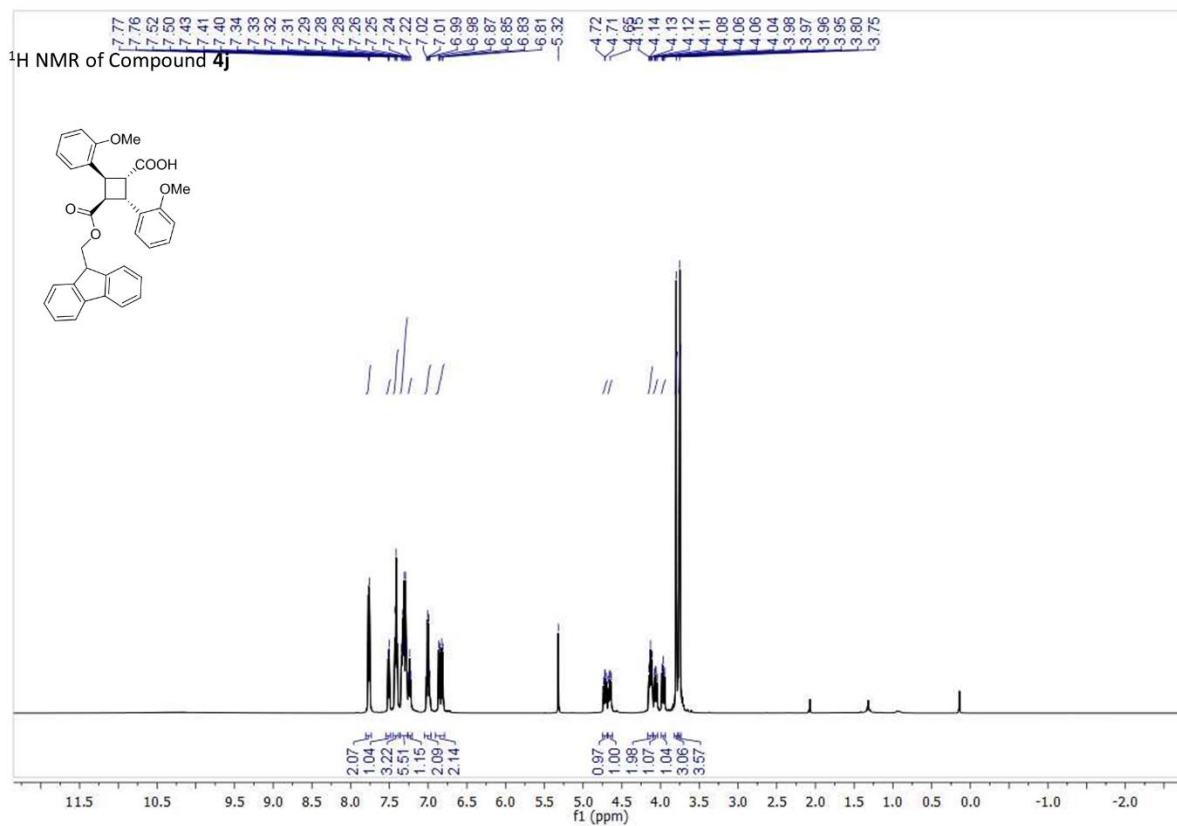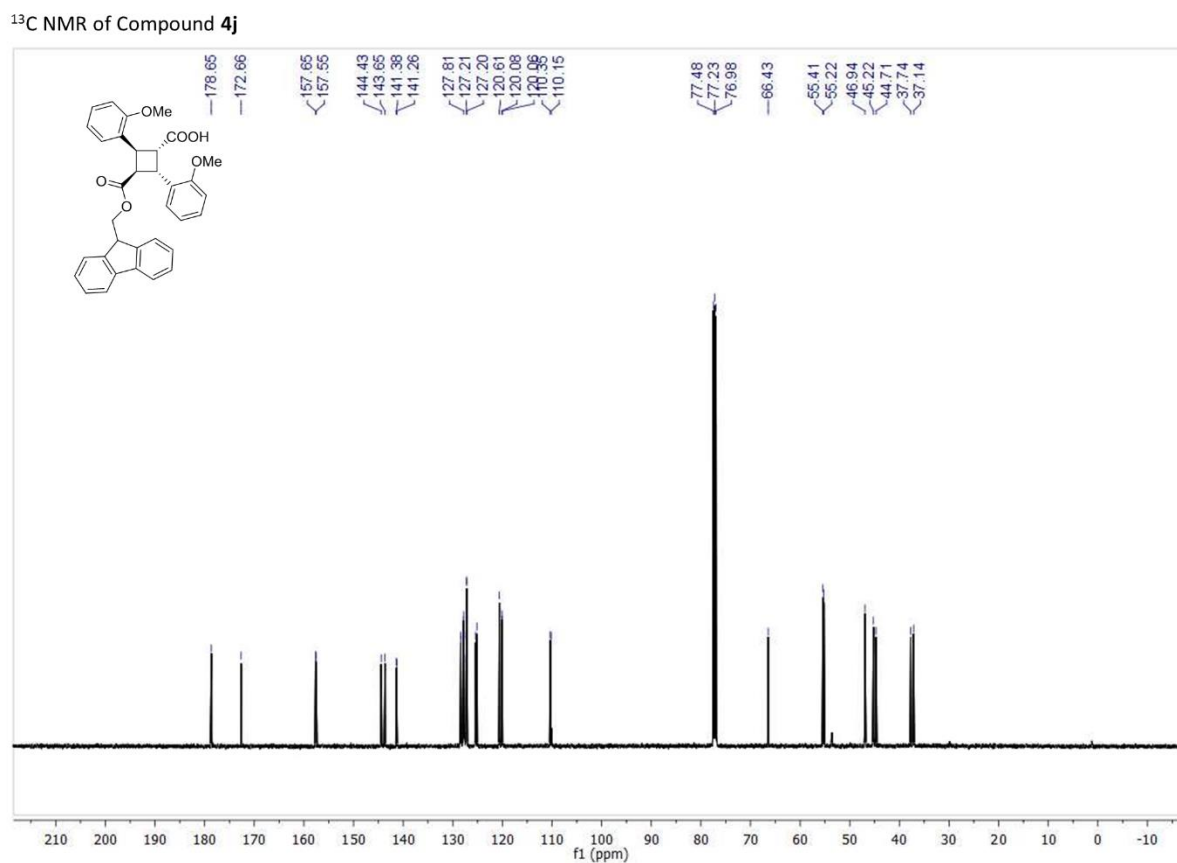

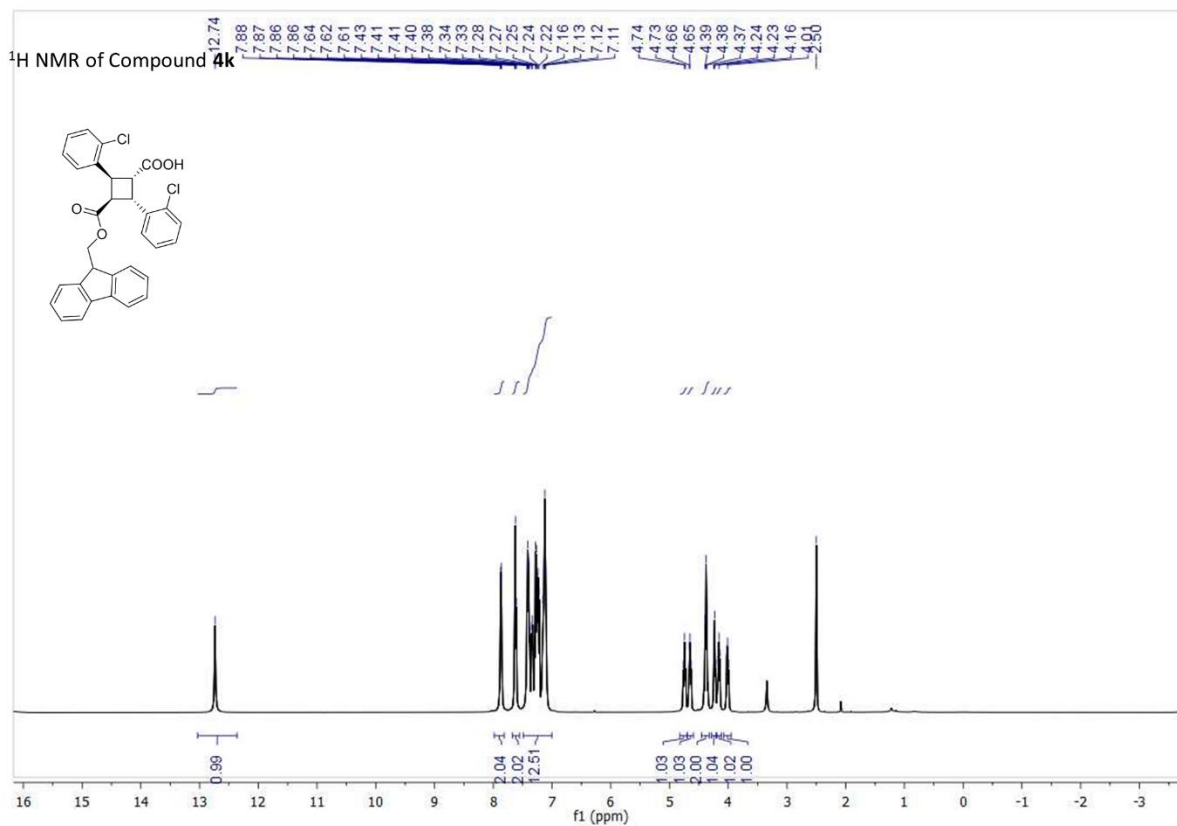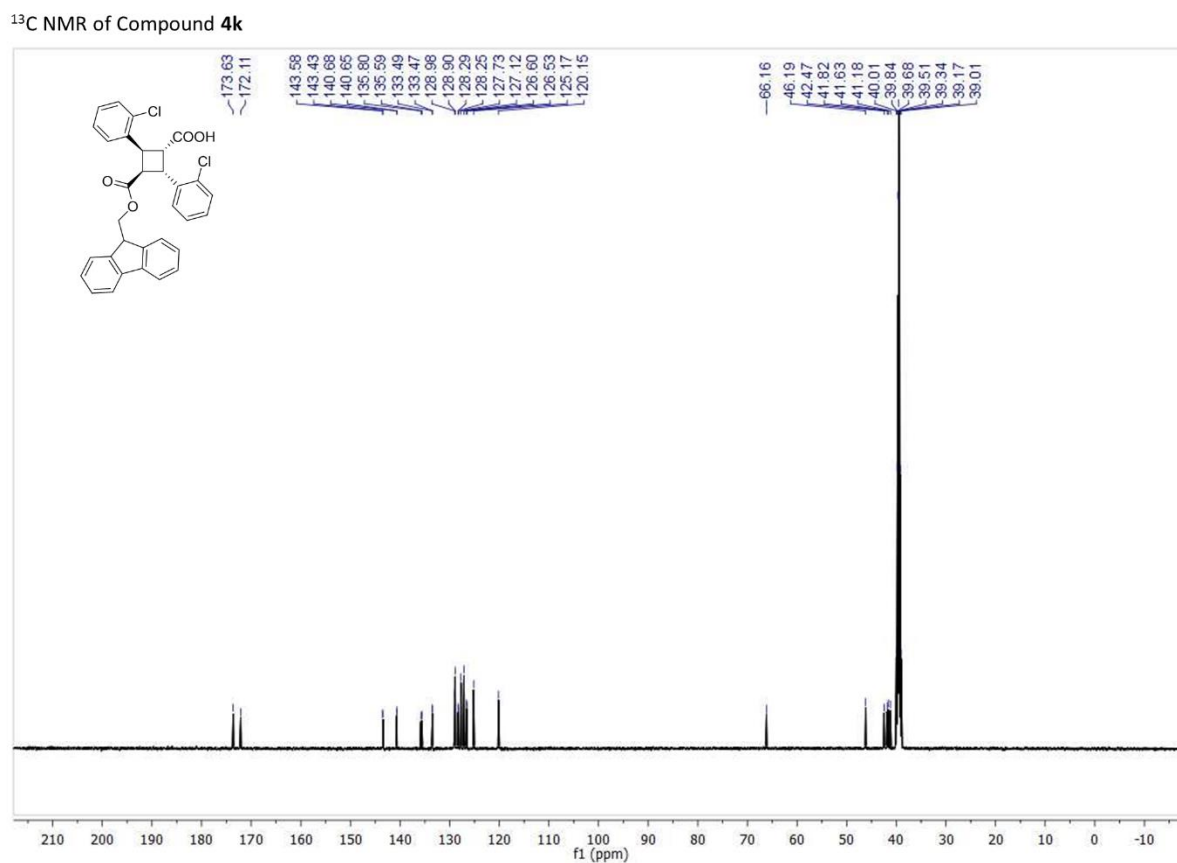

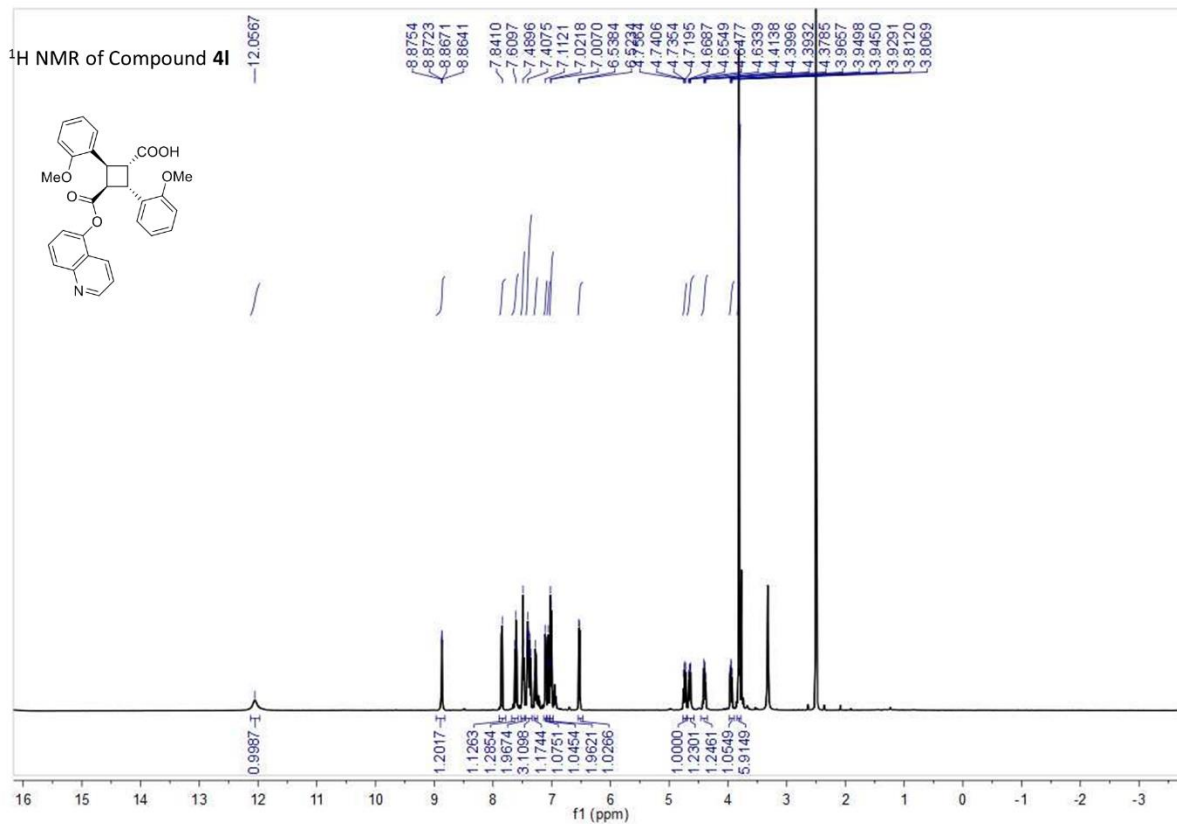

<sup>13</sup>C NMR of Compound 4i

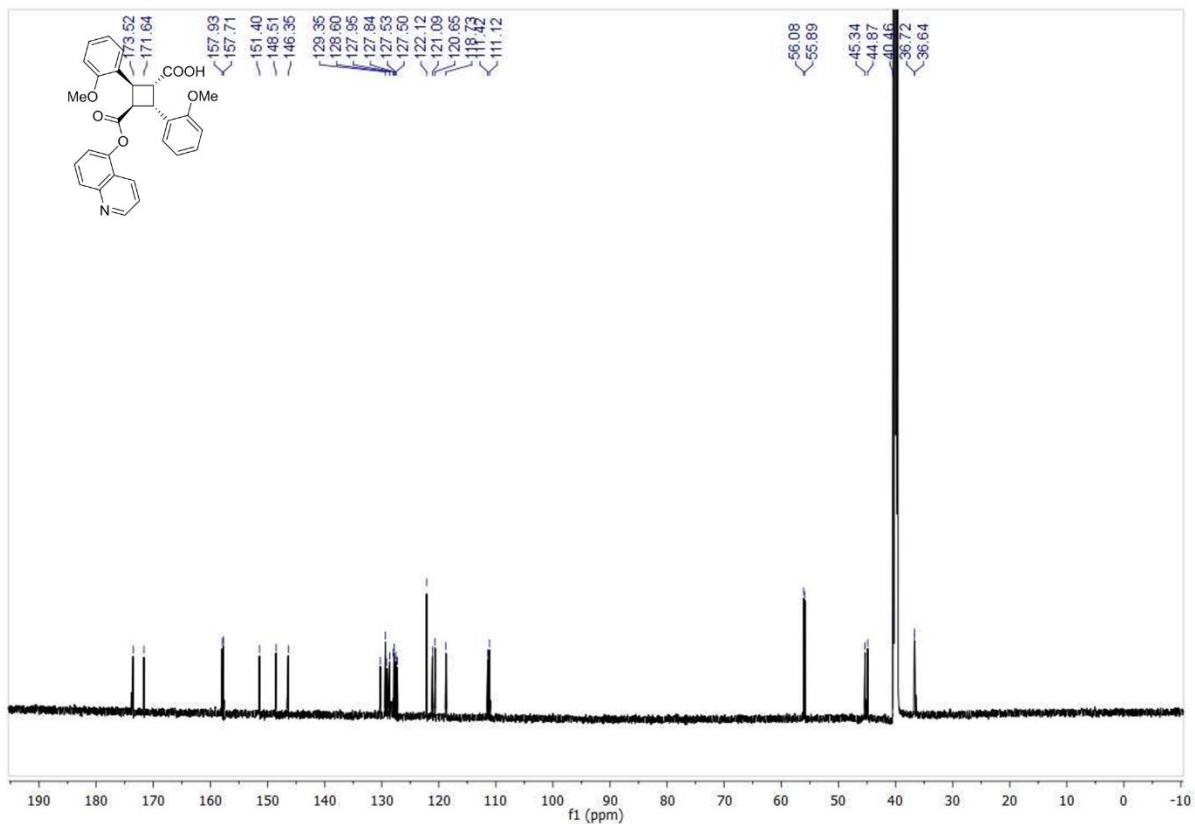

<sup>1</sup>H NMR of Compound 5a

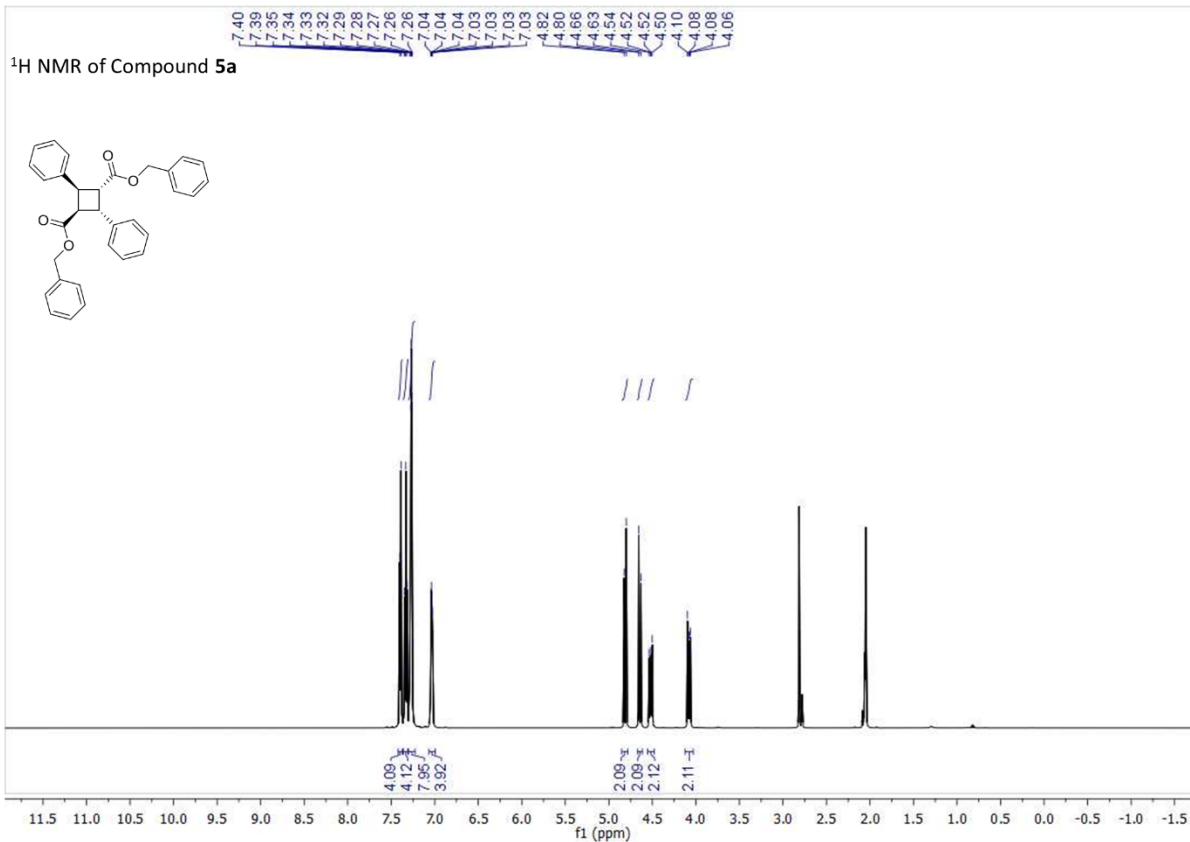

<sup>13</sup>C NMR of Compound 5a

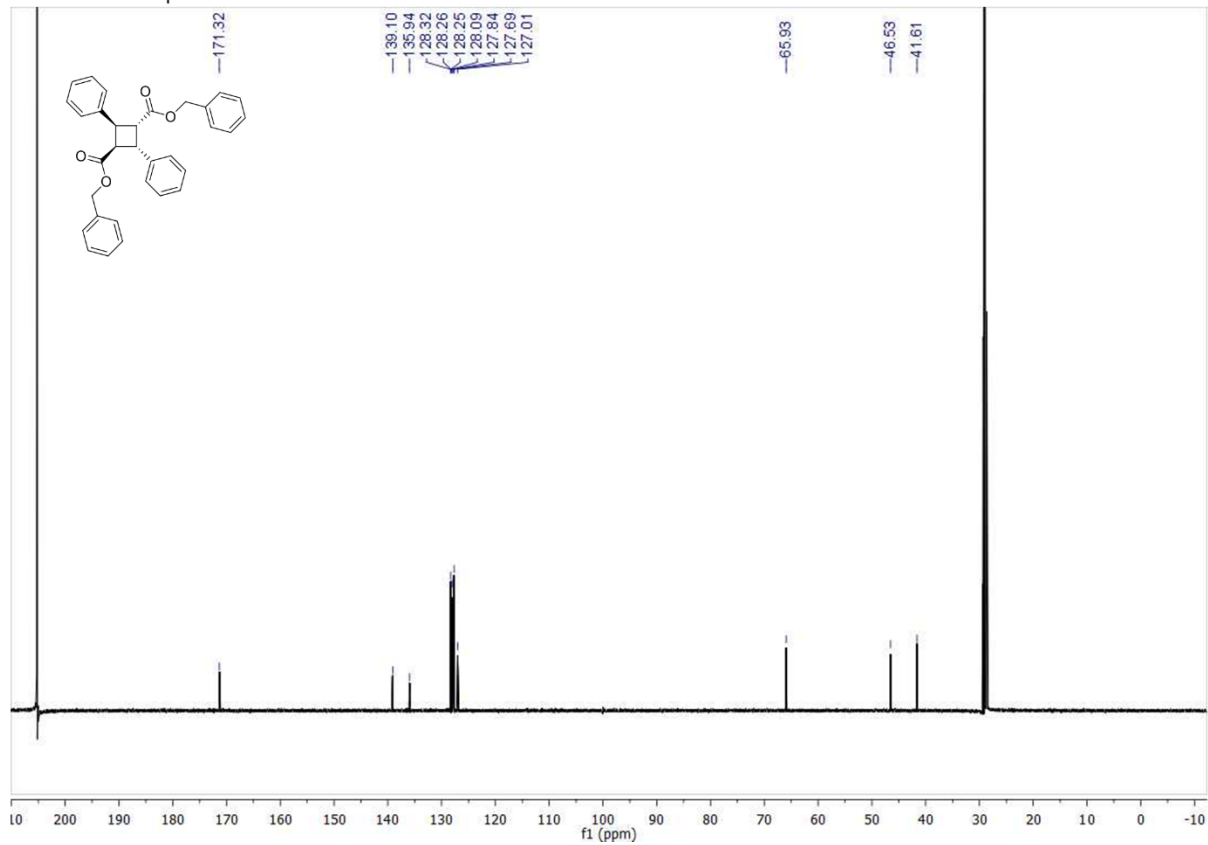

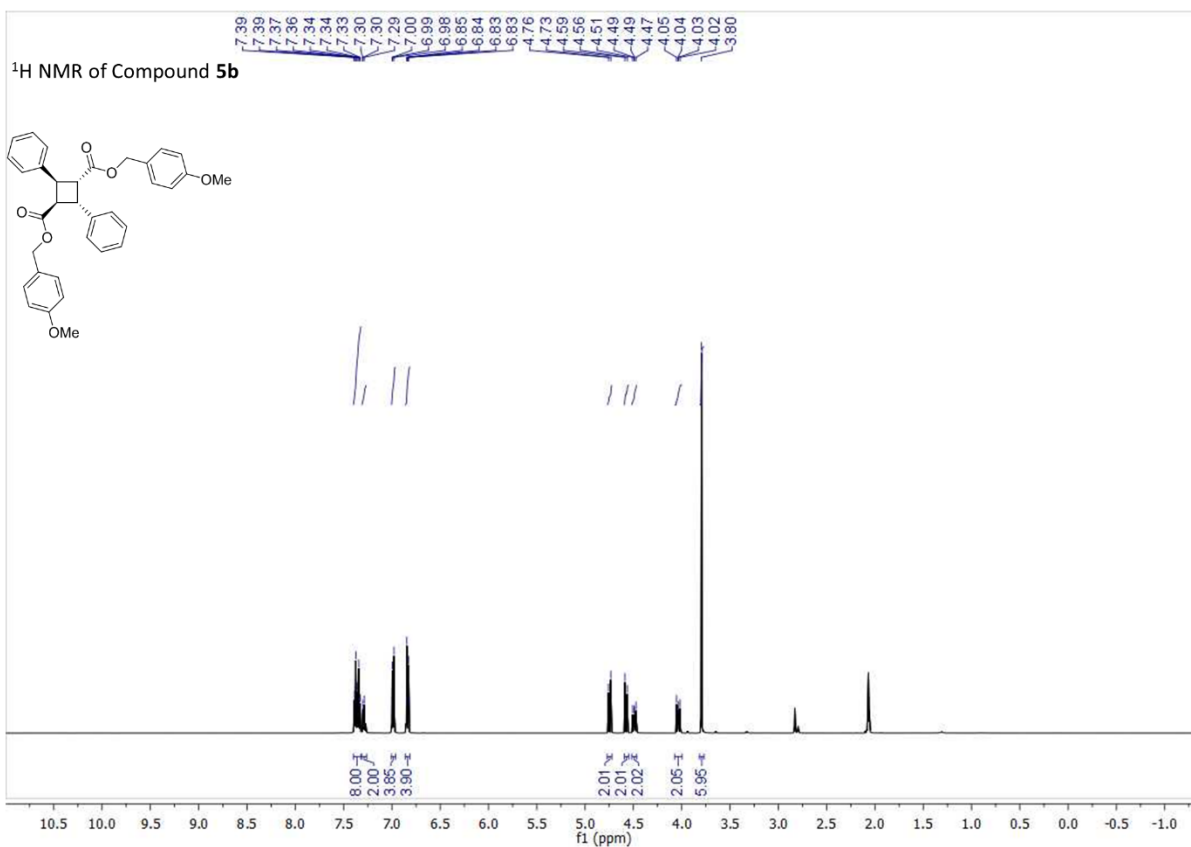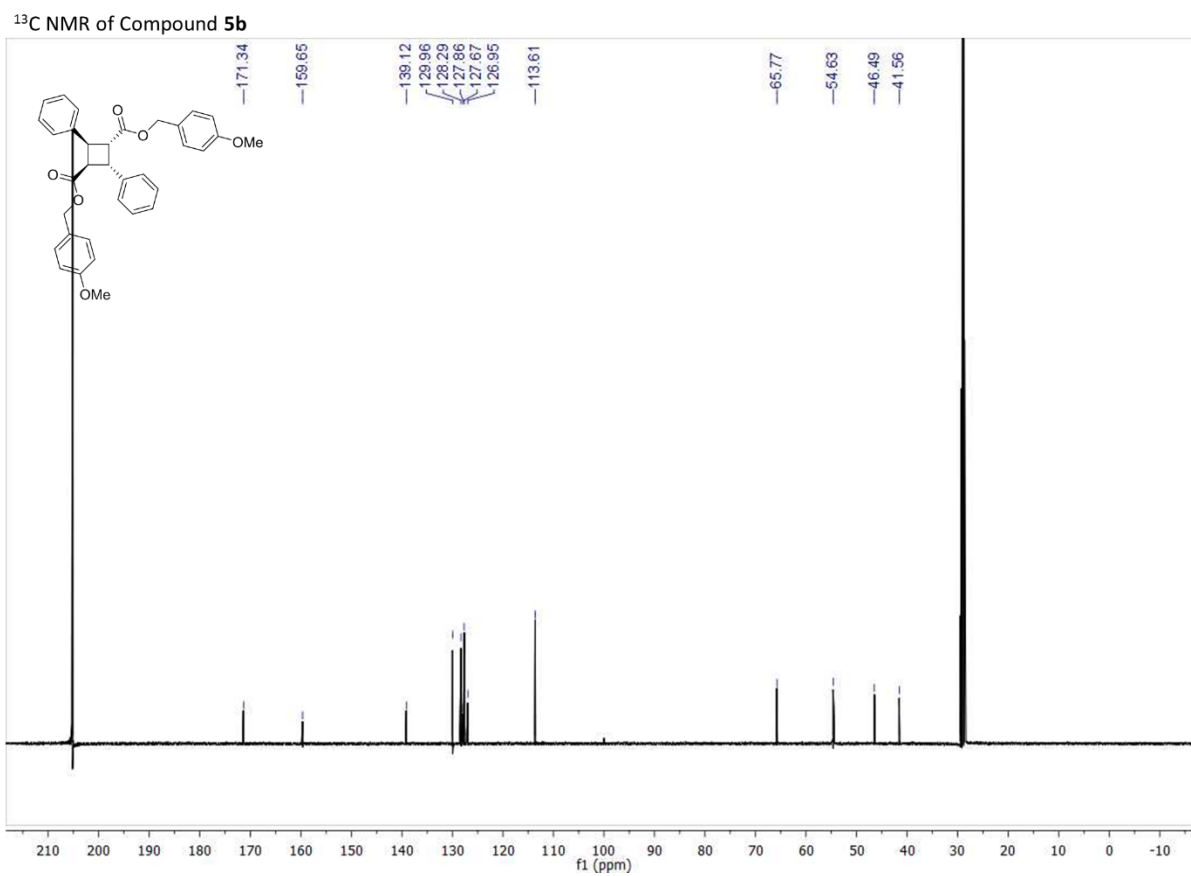



<sup>1</sup>H NMR of Compound 5c

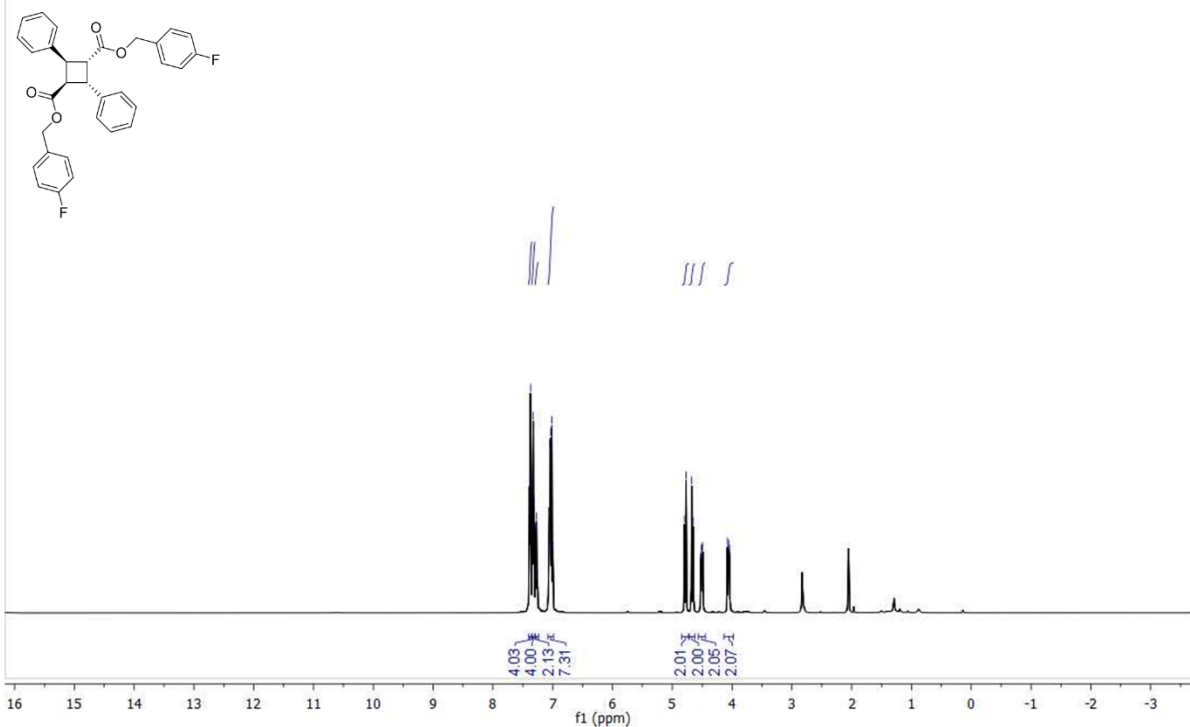

<sup>13</sup>C NMR of Compound 5c

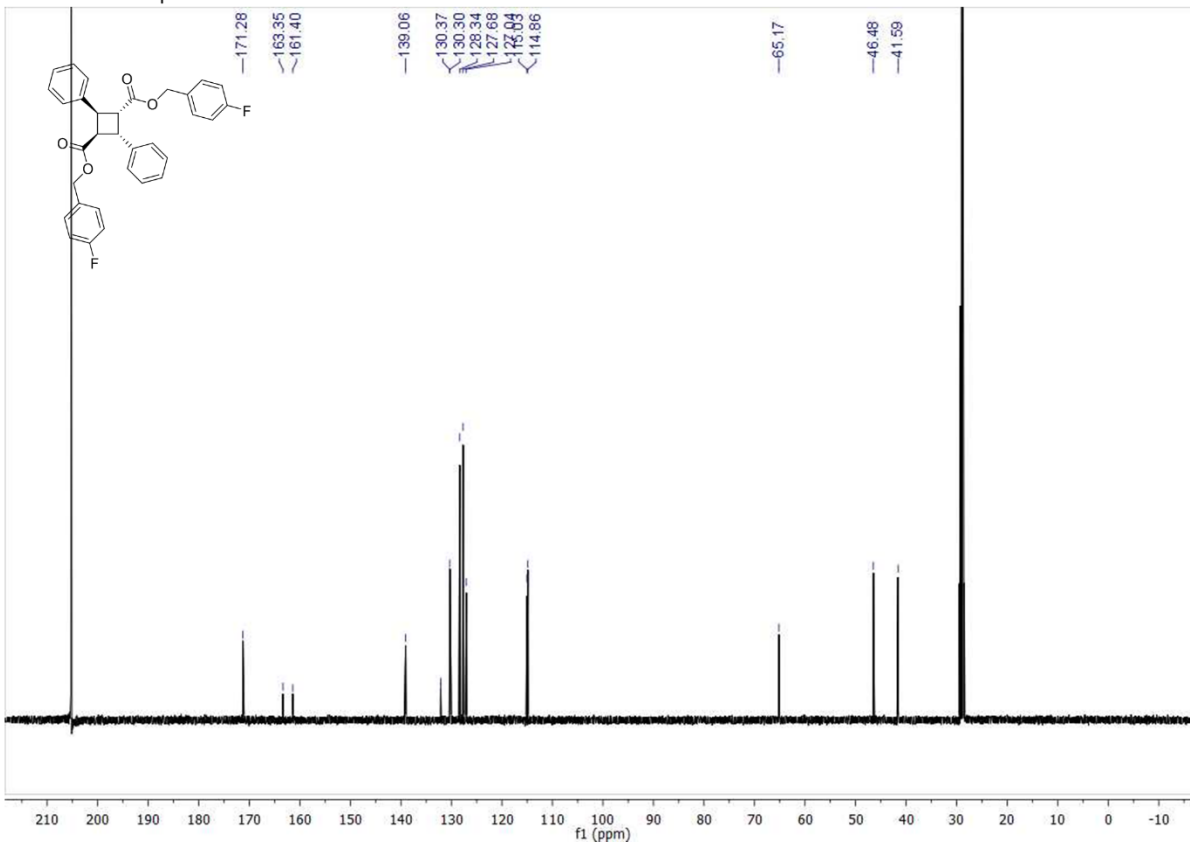

<sup>1</sup>H NMR of Compound 5d

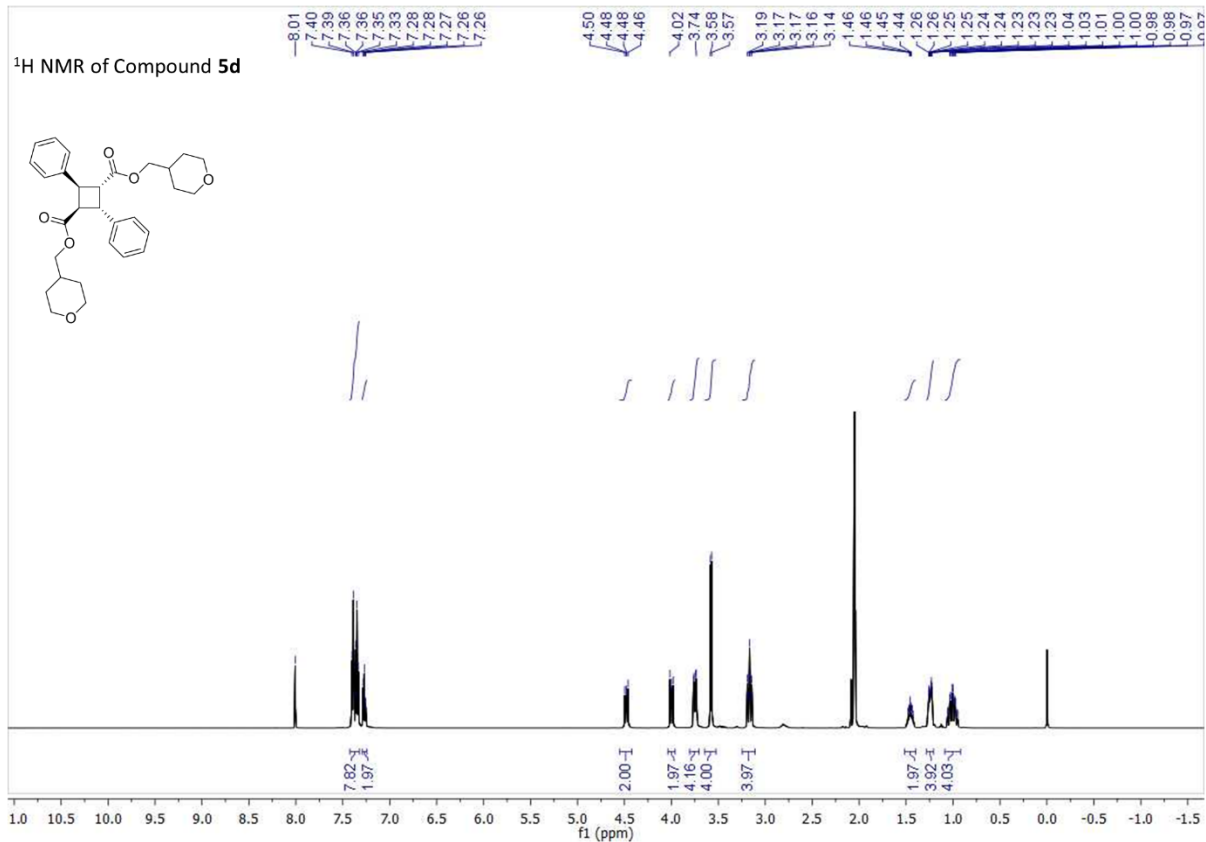

<sup>13</sup>C NMR of Compound 5d

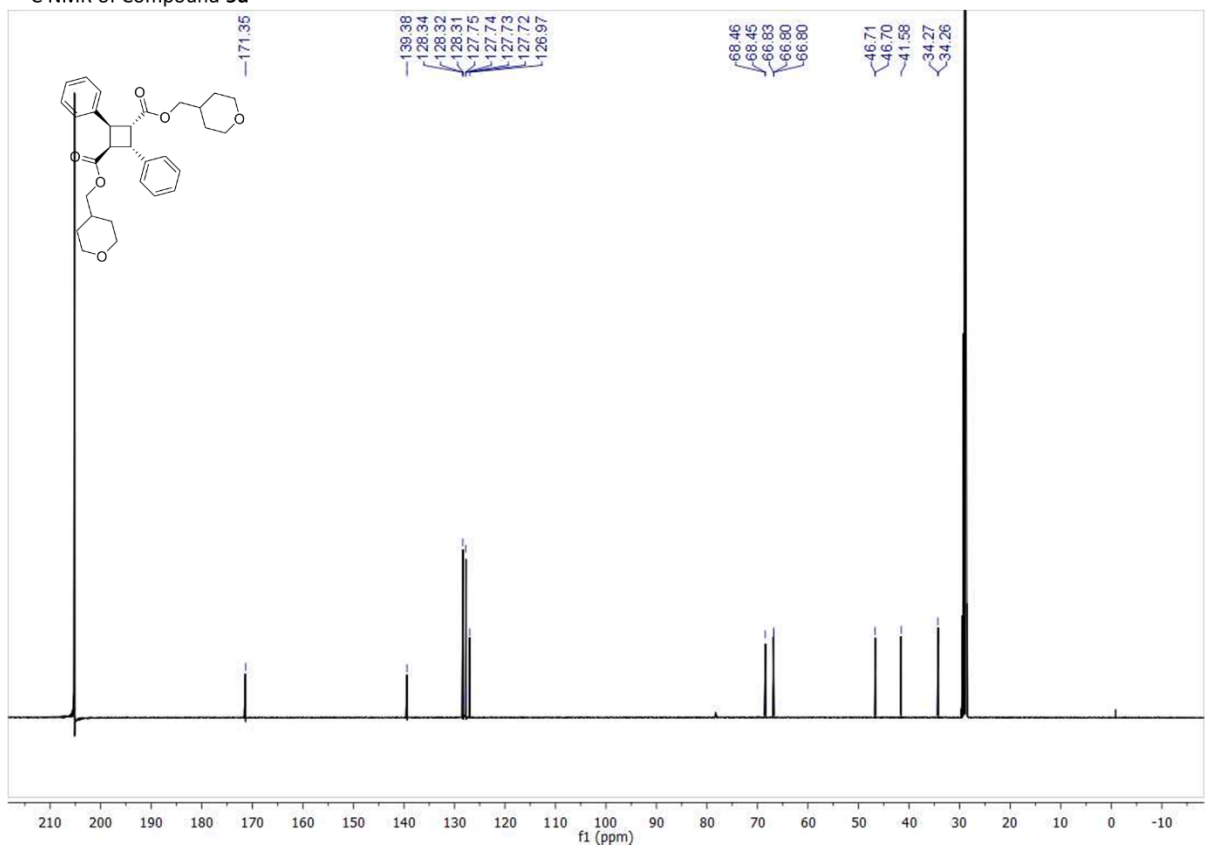

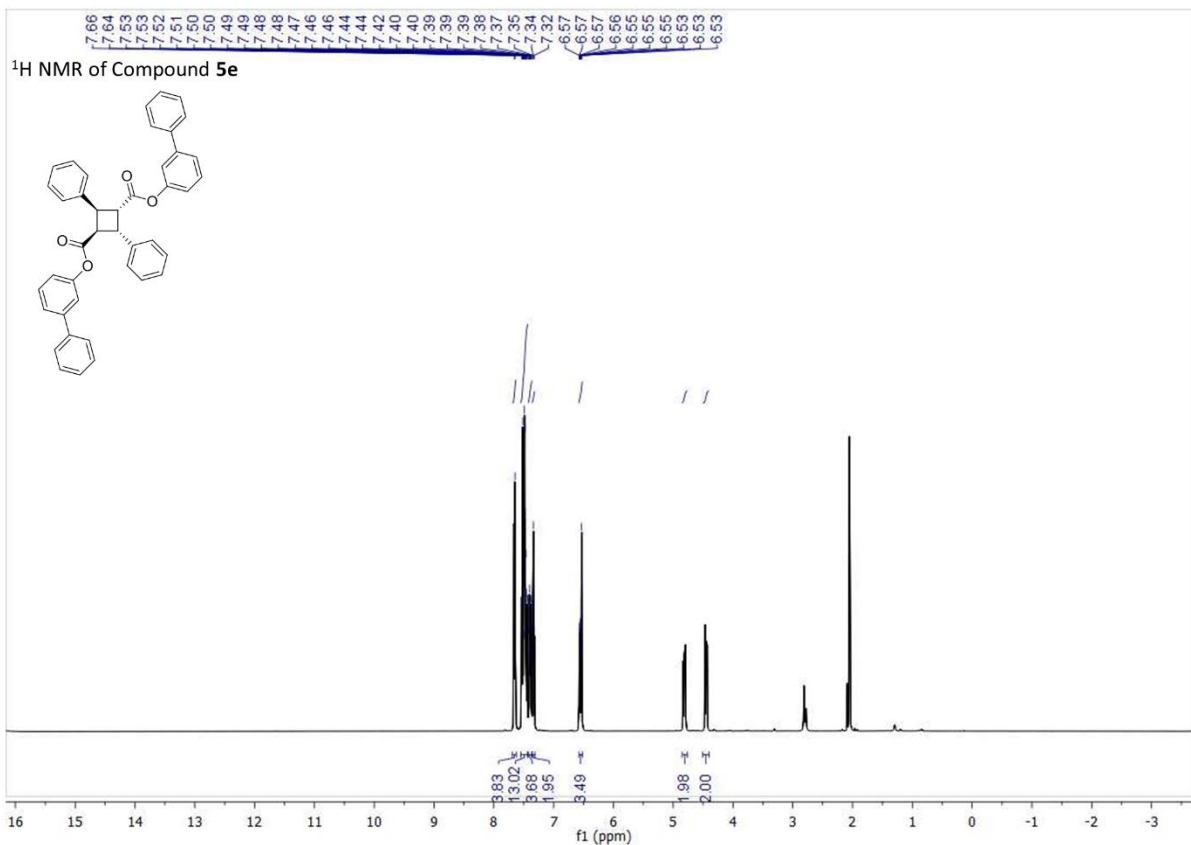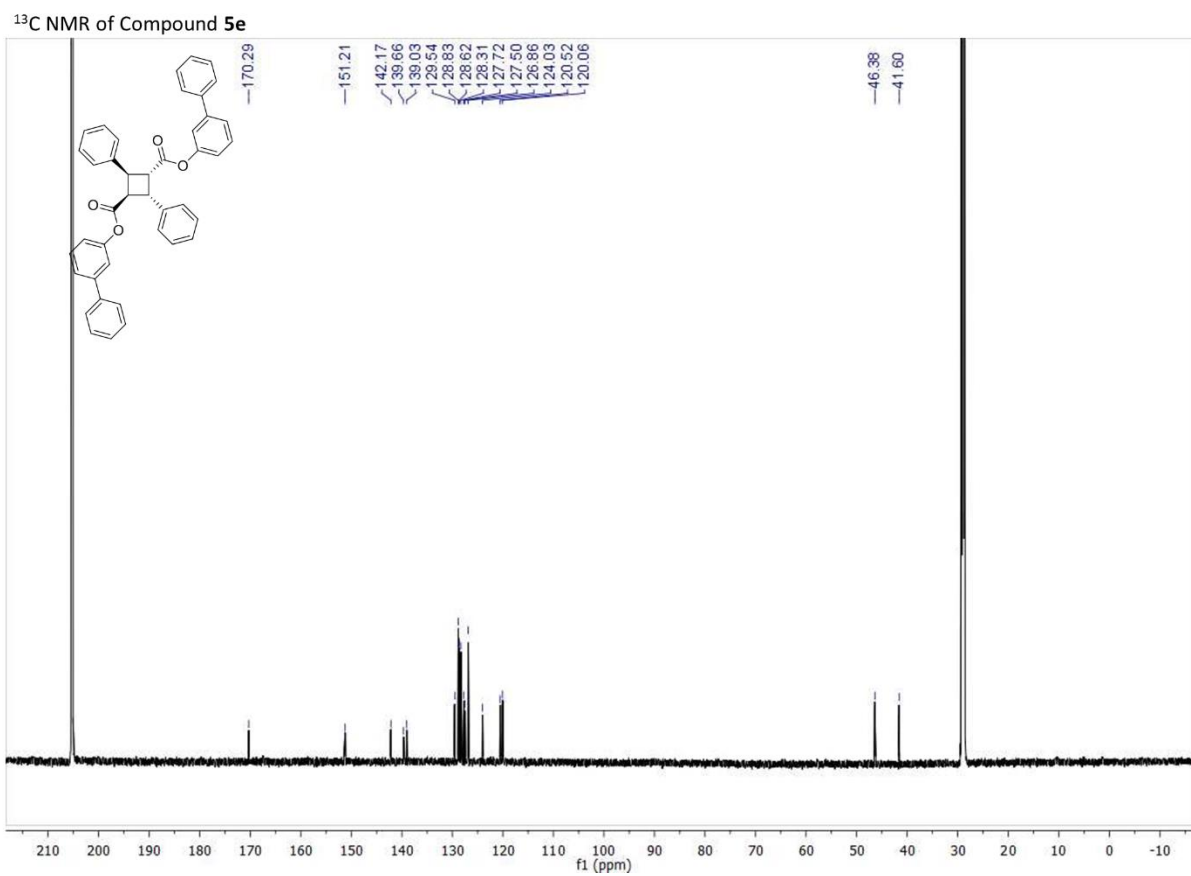

<sup>1</sup>H NMR of Compound 6a

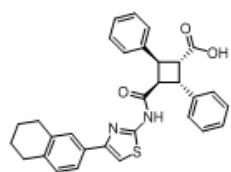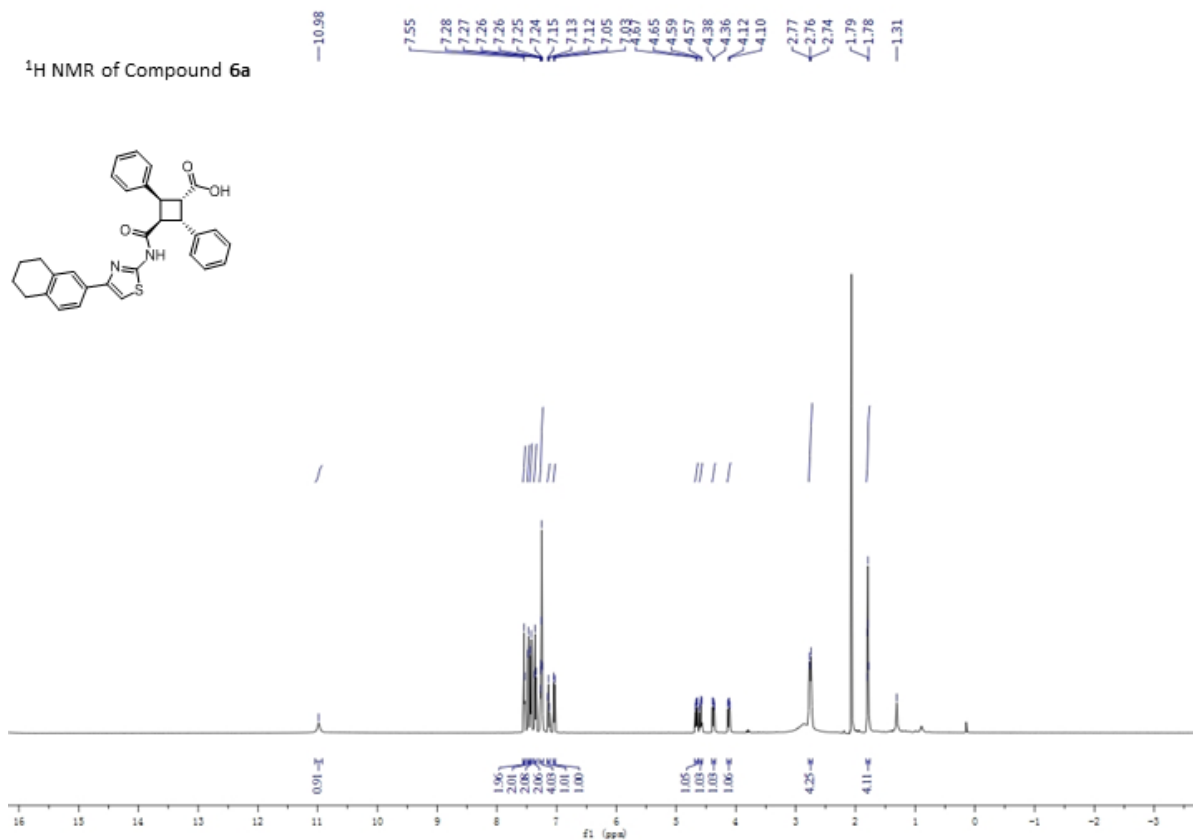

<sup>13</sup>C NMR of Compound 6a

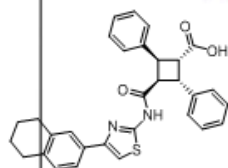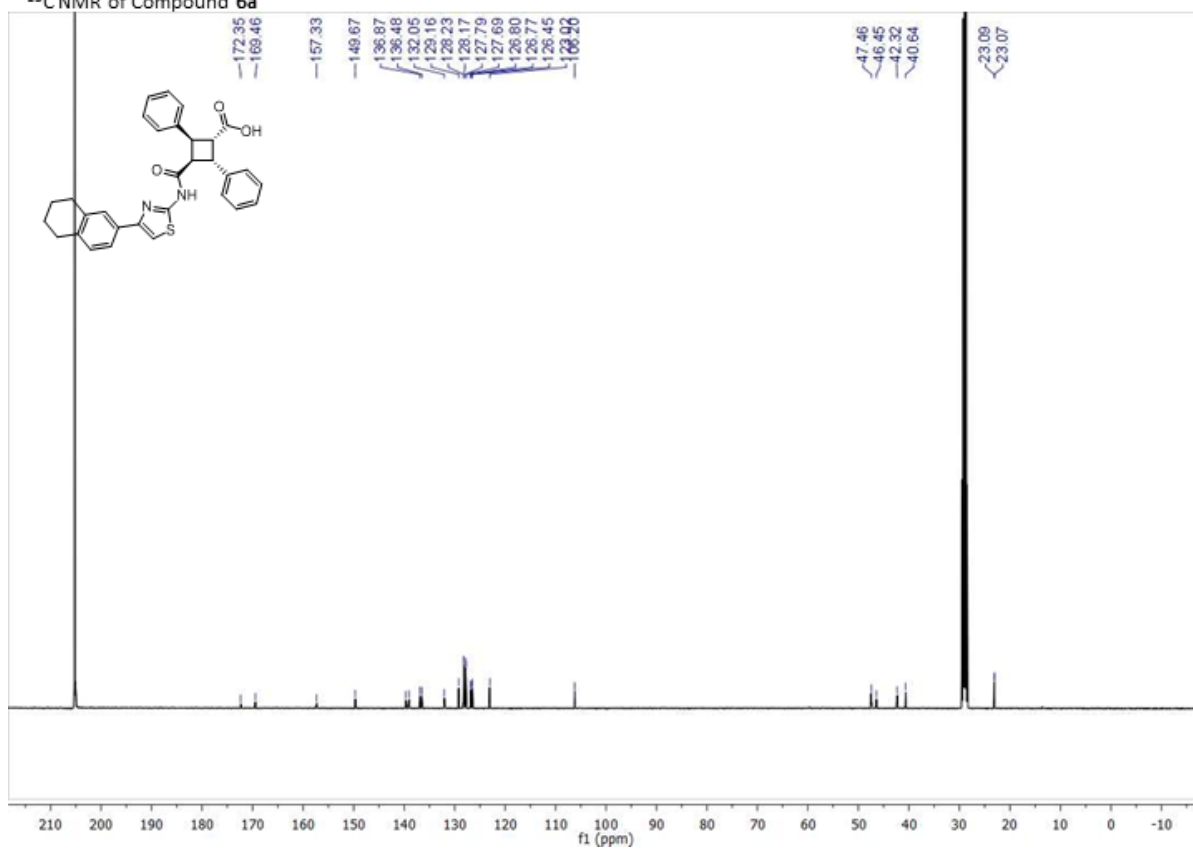

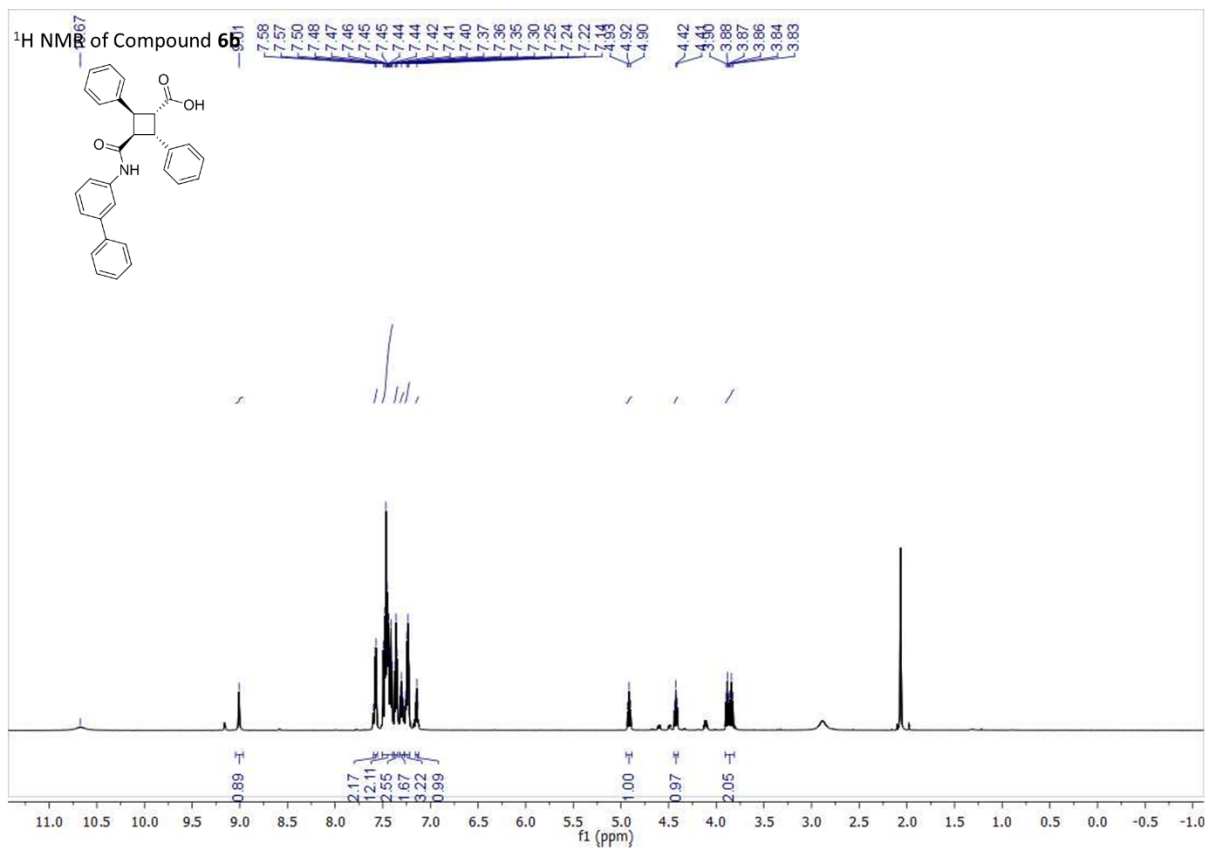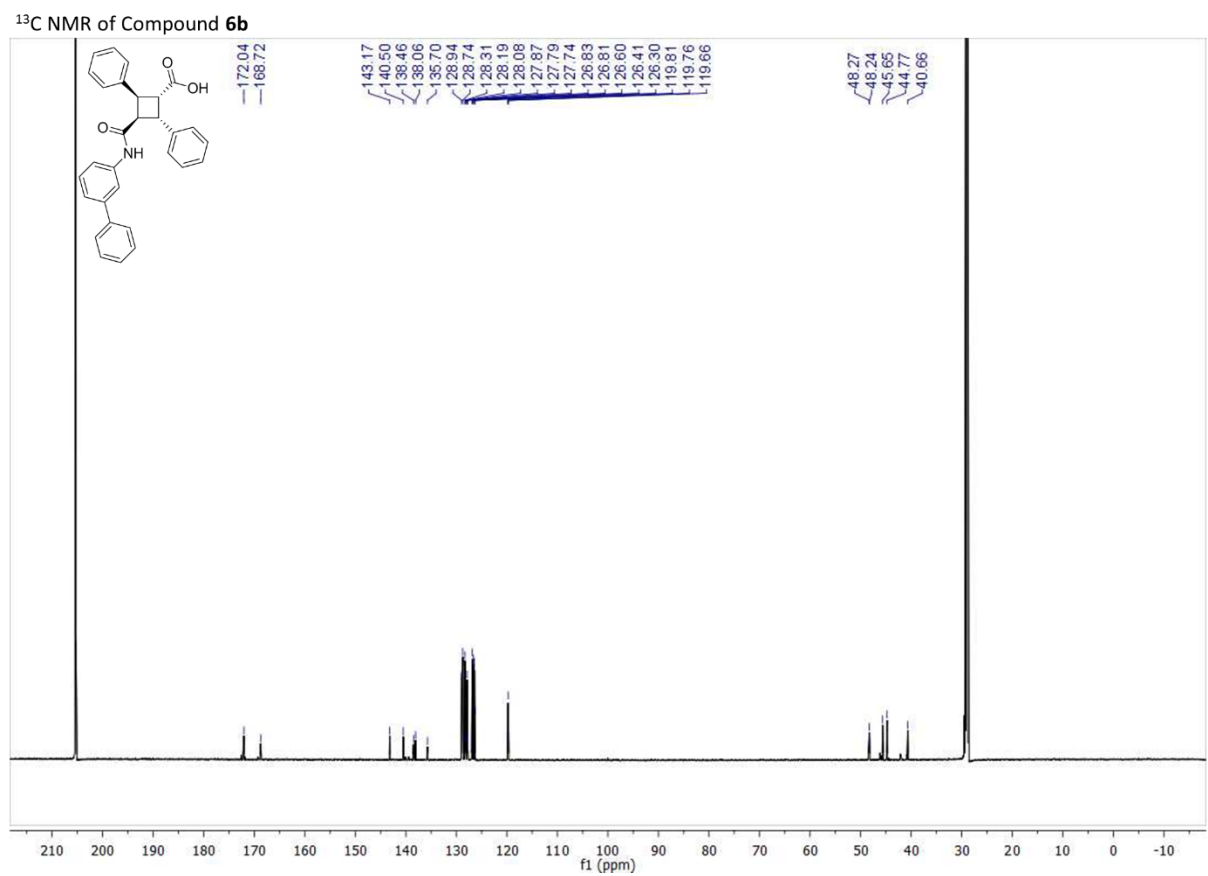

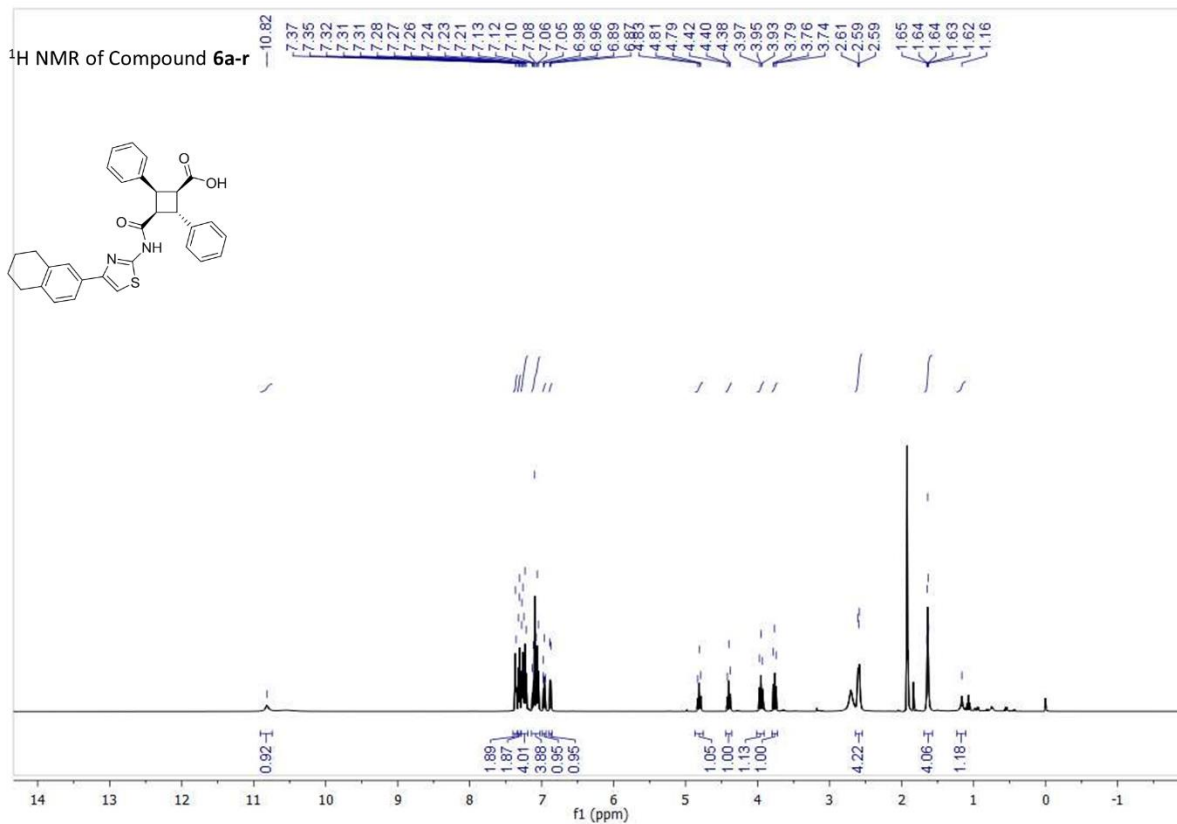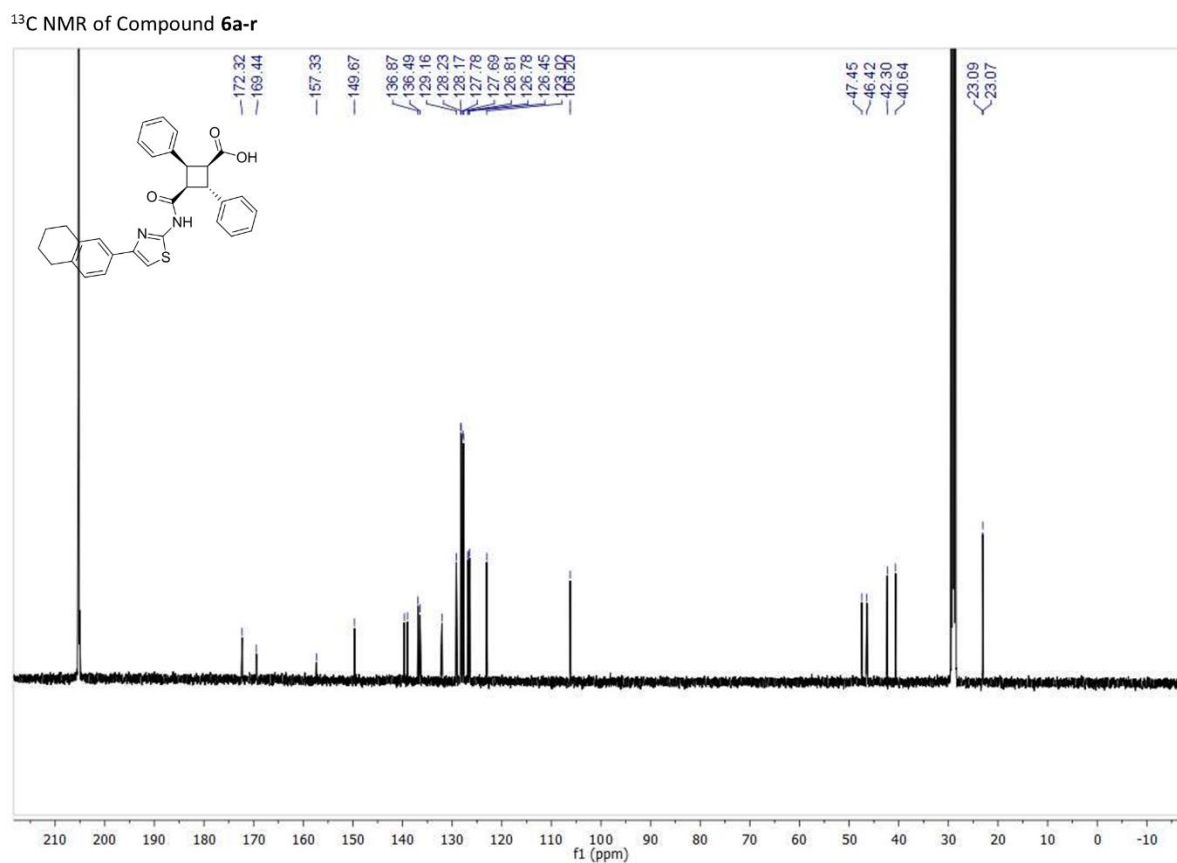

Supplement: NIHMS970592-supplement-SM.pdf [file NIHMS970592-supplement-SM.pdf]
